# Supplementary material for: Examining the risk of depression or self-harm associated with incretin-based therapies used to manage hyperglycaemia in patients with type 2 diabetes: a cohort study using the UK Clinical Practice Research Datalink
Source: PubMed Central journal article supplement — BMJ Open. 2018 Oct 8;8(10):e023830. doi: 10.1136/bmjopen-2018-023830 (PMC6194463; doi:10.1136/bmjopen-2018-023830), 2018-10-08
Supplement: bmjopen-2018-023830.draft_revisions.pdf [file bmjopen-2018-023830.draft_revisions.pdf]

# BMJ Open

BMJ Open is committed to open peer review. As part of this commitment we make the peer review history of every article we publish publicly available.

When an article is published we post the peer reviewers' comments and the authors' responses online. We also post the versions of the paper that were used during peer review. These are the versions that the peer review comments apply to.

The versions of the paper that follow are the versions that were submitted during the peer review process. They are not the versions of record or the final published versions. They should not be cited or distributed as the published version of this manuscript.

BMJ Open is an open access journal and the full, final, typeset and author-corrected version of record of the manuscript is available on our site with no access controls, subscription charges or pay-per-view fees (<http://bmjopen.bmj.com>).

If you have any questions on BMJ Open's open peer review process please email [info.bmjopen@bmj.com](mailto:info.bmjopen@bmj.com)

# BMJ Open

## A Cohort Study Examining the Risk of Depression or Self-Harm Associated with Incretin-based Therapies Used to Manage Hyperglycemia in Patients with Type 2 Diabetes

|                               |                                                                                                                                                                                                                                                                                                                                                                                                                                                                                    |
|-------------------------------|------------------------------------------------------------------------------------------------------------------------------------------------------------------------------------------------------------------------------------------------------------------------------------------------------------------------------------------------------------------------------------------------------------------------------------------------------------------------------------|
| Journal:                      | <i>BMJ Open</i>                                                                                                                                                                                                                                                                                                                                                                                                                                                                    |
| Manuscript ID                 | bmjopen-2018-023830                                                                                                                                                                                                                                                                                                                                                                                                                                                                |
| Article Type:                 | Research                                                                                                                                                                                                                                                                                                                                                                                                                                                                           |
| Date Submitted by the Author: | 22-Jun-2018                                                                                                                                                                                                                                                                                                                                                                                                                                                                        |
| Complete List of Authors:     | Gamble, John Michael; University of Waterloo, School of Pharmacy; Memorial University of Newfoundland, School of Pharmacy<br>Chibrikov, Eugene; Memorial University of Newfoundland, School of Pharmacy and Faculty of Medicine<br>Midodzi, William; Memorial University of Newfoundland, Faculty of Medicine<br>Twells, Laurie; Memorial University of Newfoundland, School of Pharmacy and Faculty of Medicine<br>Majumdar, Sumit; University of Alberta, Department of Medicine |
| Keywords:                     | General diabetes < DIABETES & ENDOCRINOLOGY, EPIDEMIOLOGY, Depression & mood disorders < PSYCHIATRY, cohort study, pharmacoepidemiology                                                                                                                                                                                                                                                                                                                                            |
|                               |                                                                                                                                                                                                                                                                                                                                                                                                                                                                                    |

SCHOLARONE™  
Manuscripts

View Only

## A Cohort Study Examining the Risk of Depression or Self-Harm Associated with Incretin-based Therapies Used to Manage Hyperglycemia in Patients with Type 2 Diabetes

John-Michael Gamble, Eugene Chibrikov, William K Midodzi, Laurie K Twells, Sumit R Majumdar<sup>†</sup>

School of Pharmacy, Faculty of Science, University of Waterloo, Waterloo, Ontario, Canada and School of Pharmacy, Memorial University of Newfoundland, St. John's, Newfoundland and Labrador, Canada, John-Michael Gamble associate clinical professor

School of Pharmacy and Faculty of Medicine, Memorial University of Newfoundland, St. John's, Newfoundland and Labrador, Canada Eugene Chibrikov research assistant

Faculty of Medicine, Memorial University of Newfoundland, St. John's, Newfoundland and Labrador, Canada William K Midodzi assistant professor

School of Pharmacy and Faculty of Medicine, Memorial University of Newfoundland, St. John's, Newfoundland and Labrador, Canada Laurie K Twells associate professor

Division of General Internal Medicine, Department of Medicine, University of Alberta, Edmonton, Alberta, Canada Sumit R Majumdar Professor

### Correspondence to:

John-Michael Gamble

School of Pharmacy

University of Waterloo

10A Victoria Street South

Kitchener, ON, Canada N2G 2C5

Phone: (519) 888-4567, ext. 21343 Fax: (519) 883-7580

Email: [jm.gamble@uwaterloo.ca](mailto:jm.gamble@uwaterloo.ca)

**Abbreviated Title:** Depression and Self-Harm Among Incretin-based Therapy Users

**Key terms:** cohort study, type 2 diabetes, dipeptidyl-peptidase 4 inhibitors, glucagon-like receptor 1 agonists, depression, suicide, self-harm

**Counts:** Abstract=294; Manuscript= 3078; Figures=3; Tables=3; References=49

<sup>†</sup> Deceased January 19, 2018

## Abstract

**Objectives:** To compare population-based incidence rates of new-onset depression or self-harm in patients initiating incretin-based therapies with that of sulfonylureas (SU) and other glucose-lowering agents.

**Design:** Population-based cohort study

**Setting:** Patients attending primary care practices registered with the UK-based Clinical Practice Research Datalink (CPRD).

**Participants:** Using the UK-based Clinical Practice Research Datalink (CPRD), we identified two incretin-based therapies cohorts: (1) DPP-4i-cohort, consisting of new-users of DPP-4 inhibitors and sulfonylureas, and (2) GLP-1RA-cohort, consisting of new-users of GLP-1 receptor agonists and sulfonylureas, between Jan-2007 and Jan-2016. Patients with a prior history of depression, self-harm, and other serious psychiatric conditions were excluded.

**Main outcome measures:** The primary study outcome comprised a composite of new-onset depression or self-harm. Unadjusted and adjusted Cox proportional hazards regression was used to quantify the association between incretin-based therapies and depression or self-harm. Deciles of high-dimensional propensity scores and concurrent number of glucose-lowering agents were used to adjust for potential confounding.

**Results:** We identified new-users of 6206 DPP-4i and 22128 sulfonylureas in the DPP-4i-cohort, and 501 GLP-1RA and 16409 sulfonylurea new-users in the GLP-1RA-cohort. The incidence of depression or self-harm was 8.2 vs. 11.7 events/1000-person-years (unadjusted hazard ratio (HR): 0.70, 95% confidence interval (CI): 0.51-0.96) in the DPP-4i-cohort and 18.2 vs. 13.6 events/1000-person-years (unadjusted hazard ratio (HR): 1.36, 95% confidence interval (CI): 0.72-2.58) in the GLP-1RA-cohort for incretin-based therapies vs sulfonylureas, respectively. Following adjustment for potential confounding, incretin-based therapies did not have an increased or decreased incidence of depression or self-harm compared to sulfonylureas (adjusted HR [DPP-4i-cohort]: 0.80, 95% CI: 0.57-1.13; adjusted HR [GLP-1RA-cohort]: 1.25, 95% CI: 0.63-2.50). Consistent results were observed for other glucose-lowering comparators including insulin and thiazolidinediones.

**Conclusions:** Our findings suggest that the two incretin-based therapies are not associated with an increased or decreased risk of depression or self-harm.

## Article Summary

- Incretin-based therapies, dipeptidyl peptidase-4 inhibitors [DPP-4i] and glucagon-like peptide-1 receptor agonists [GLP-1RA], used to manage hyperglycemia in patients with type 2 diabetes may have neuropsychiatric effects due to GLP-1 receptor expression in the central nervous system
- This study found that initiation of an incretin-based therapy, either a DPP-4 inhibitor or a GLP-1 receptor agonist, does not appear to substantially increase or decrease the risk of depression or self-harm in patients with type 2 diabetes

## Strengths and limitations of the study

- This study used a new-user active comparator design with high dimensional propensity scores to control for confounding
- This study cannot rule out small or modest difference in risk of depression or self-harm between incretin-based therapy users and other glucose-lowering due to study power limitations

## Introduction

Patients with diabetes frequently have coexisting depression with a prevalence ranging from 12% to 27%.<sup>[1]</sup> Depression is not only associated with diabetes but with an increased risk of diabetes-related complications,<sup>[2]</sup> decreased quality of life,<sup>[3]</sup> and decreased life-expectancy.<sup>[4]</sup> Diabetes is also associated with new-onset depression; however, the temporal association between diabetes and depression remains unclear.<sup>[5,6]</sup> Moreover, diabetes is associated with an increased risk of intentional self-harm,<sup>[7,8]</sup> albeit there is significant heterogeneity between studies assessing the association between diabetes and suicide.<sup>[9]</sup> It has been postulated that certain glucose-lowering pharmacotherapies may have a positive influence on the symptoms of depression, although the evidence is sparse.<sup>[10–15]</sup> The incretin-based therapies in particular may have neuropsychiatric effects given the presence of glucagon-like peptide-1 (GLP-1) receptors in the central nervous system.<sup>[20,21]</sup>

Concerns surrounding central nervous system effects stem from a case report of exenatide-induced depression and from pooled adverse event data from pre-marketing clinical trials for sitagliptin.<sup>[22–24]</sup> Pooled event rates for the latter suggested a 4-fold increased risk of suicide ideation and completed suicide in sitagliptin users compared to non-

1  
2 users.[23,25] Animal models suggest adverse neuropsychiatric effects are biologically  
3 plausible given the expression of GLP-1 receptors in the brain.[20] Furthermore, studies have  
4 shown low dipeptidyl peptidase-4 (DPP-4) activity is correlated with depression.[26–28]  
5 Although the case-report mentioned above suggested a potential increased risk of  
6 depression, a recent study reported positive effects of GLP-1 receptor agonists on patients  
7 well-being.[29] Therefore alternations in DPP-4 enzymatic activity may modulate the  
8 pathophysiology of neuropsychiatric conditions such as major depression.  
9  
10  
11  
12  
13

14 Using data from a population-based cohort of patients with type 2 diabetes, we aimed  
15 to quantify the association between incretin-based therapies and the composite of new-onset  
16 depression and self-harm.  
17  
18  
19  
20  
21  
22  
23  
24  
25  
26  
27  
28  
29  
30  
31  
32  
33  
34  
35  
36  
37  
38  
39  
40  
41  
42  
43  
44  
45  
46  
47  
48  
49  
50  
51  
52  
53  
54  
55  
56  
57  
58  
59  
60

## Methods

### *Study Design and Data Sources*

We conducted a population-based cohort study using data from the Clinical Practice Research Datalink (CPRD), which captures electronic medical information for primary care encounters by general practitioners in the United Kingdom (UK).[30] The CPRD contains de-identified individual-level longitudinal data collected from a subset of primary care practices (~700) in the UK. The CPRD data is a representative sample that is similar to the overall UK population in age, sex, and ethnicity.[31] The database includes sociodemographic and lifestyle variables (e.g., alcohol consumption), physiological measures (e.g., blood pressure), laboratory testing (e.g., glycated hemoglobin [A1c]), physician-assigned diagnoses using the Read classification system, and prescription records from general practitioner records. Data quality checks are performed in accordance with standardized guidelines that certify practices as up-to-standard. Furthermore, over 350 validation studies have been performed using the CPRD.[32,33] Information on hospitalizations and causes of death are available for a subset of CPRD patients through linkages with the external databases. Details regarding the data quality, linkages, and utility are available elsewhere.[34] The CPRD has been used extensively to study associations between drugs and depression and self-harm.[35–39] Our study protocol was approved by the Independent Scientific Advisory Committee (ISAC 15\_016RARA, August 2017) and received approval from the Health Research Ethics Board at Memorial University.

### *Study Cohorts*

Our source population consisted of all patients over 18 years of age with a minimum of 12-months of up-to-standard medical history in the CPRD database that received a new diagnosis for type 2 diabetes or a new prescription for any glucose-lowering therapy between January 1, 2001 and the February 2016 CPRD dataset build. We used a 365-day washout period to define a new diagnosis or new glucose-lowering therapy use. A sub-cohort of patients (~58%) selected from the source population was linked to Hospital Episode Statistics (HES – follow-up until 31March2014), Office of National Statistics (ONS – follow-up until 30April2014), and index of multiple deprivation (IMD [2010]) data to capture hospital records, causes of death, and socioeconomic status information, respectively. Women with polycystic ovarian syndrome, gestational diabetes, or whom were pregnant during the study period were

1  
2 excluded. In addition, we excluded patients with a study entry date prior to January 1, 2007 as  
3 the first incretin-based therapies became available in the UK in early 2007.  
4  
5

6  
7 We identified two main study cohorts. Specifically, the first cohort consisted of new-  
8 users of DPP-4 inhibitors and new-users of sulfonylureas (DPP-4 inhibitor cohort) and the  
9 second cohort consisted of new-users of GLP-1 receptor agonists and new-users of  
10 sulfonylureas (GLP-1 receptor agonist cohort). Although new-users of sulfonylureas served as  
11 the reference population for both cohorts, these individuals were selected separately for  
12 cohort as prior use of other non-incretin glucose-lowering agents was permitted. To minimize  
13 potential selection bias within the above cohorts, we excluded patients with a history of  
14 depression, self-harm, anxiety, and other serious psychiatric conditions in the year prior to a  
15 patient's cohort entry date.  
16  
17  
18  
19  
20  
21  
22  
23  
24

### 25 ***Exposure and Outcome Definitions***

26  
27 Within each incretin-based therapy cohort, we defined person-time exposure to all  
28 classes of glucose-lowering therapy including (1) DPP-4 inhibitors, (2) GLP-1 receptor  
29 agonists, (3) Sulfonylureas, (4) Metformin, (5) Thiazolidinediones, (6) Sodium glucose co-  
30 transporter-2 inhibitors, (7) Meglitinides, (8) Acarbose, (9) Insulin, and (10) no glucose-  
31 lowering drug therapy (i.e. diet/lifestyle). Patient's contributed person-time to each of the  
32 aforementioned categories on the day of their first prescription or date of diagnosis (defined  
33 as the patient's index date) until a patient discontinued the drug, left a CPRD practice, died, or  
34 on the final date of follow-up, whichever occurred first. To account for potential non-  
35 adherence, we included a portion of follow-up time following the end of the expected  
36 medication supply that was equivalent to 50% of the prescription duration as a period of  
37 exposure.  
38  
39  
40  
41  
42  
43  
44  
45

46 Our primary outcome the composite of either new-onset depression or self-harm,  
47 including suicide and suicidal ideation. If a patient experienced more than one event, the date  
48 of the first event was used. New-onset depression or episodes of self-harm were identified  
49 using diagnostic codes from either the CPRD, HES, or ONS data sources (specific codes  
50 available in supplemental material in Appendices A and B).  
51  
52  
53  
54  
55  
56  
57  
58  
59  
60



## **Statistical Analysis**

Unadjusted and adjusted Cox proportional hazards regression was used to quantify the association between incretin-based therapies and depression or self-harm. Our primary exposure contrasts of interest were DPP-4 inhibitors vs. sulfonylureas and GLP-1 receptor agonists vs. sulfonylureas within the DPP-4 inhibitor and GLP-1 receptor agonists cohorts respectively. Sulfonylureas were chosen a priori as the main reference group given their use in clinical practice as second or third agents resembles incretin-based therapies. Patients contributed follow-up time from the initiation of the incretin-based therapy of interest or comparator until they experienced the composite outcome of interest or were censored. Censoring occurred upon the earliest date of the following events: discontinuation of the incretin-based therapy of interest or comparator, switching between an incretin-based therapy to the comparator (or vice-versa), leaving a CPRD practice site, death, end of study period.

To adjust for potential confounders, we used a high-dimensional propensity score (hdPS) algorithm to select up to 40 empirical covariates.[40] Using a multivariable logistic regression model that included the both empirically derived and predefined (age, sex, alcohol abuse, body mass index, duration of treated diabetes, comorbidities, number of hospitalizations, HbA1c, prior medications use, smoking status, socioeconomic status [quintiles of the index of multiple deprivation], use of other glucose-lowering therapies, year of cohort entry. A detailed list of covariates forced into propensity score model is shown in Appendix C) covariates, we calculated the probability of initiating a DPP-4 inhibitor versus a sulfonylurea (or comparator for sensitivity analysis). Patients with overlapping propensity scores were included in the analysis. A separate hdPS procedure was run for the GLP-1 receptor agonist cohort. Adjusted hazard ratios and 95% confidence intervals were calculated using a Cox proportional hazards regression model with deciles of the hdPS and variable indicating the number of glucose-lowering agents during follow-up (1, 2, 3 or more). We used standard graphical approaches to assess model assumptions for which no violations were noted.

Secondary analyses included alternative comparator groups and components of composite outcome (i.e., depression and self-harm as separate outcomes). In addition, we conducted several additional sensitivity analyses. First, we used two alternative methods to adjust for potential confounding including a matched propensity score approach (1:1 -

1  
2 matching using greedy nearest neighbor approach with a caliper set at 0.2 times the standard  
3 deviation of the natural logarithm of the propensity score) and grouping patients with identical  
4 patterns of glucose-lowering therapies prior to and following cohort initiation. For the latter  
5 approach, an example of how we grouped patients is as follows. Patients who started with  
6 metformin monotherapy and added an incretin-based therapy would be grouped with patients  
7 who also started metformin monotherapy and then added the comparator drug of interest.  
8 Groups with less than 25 patients were excluded from this analysis. We used a categorical  
9 variable to adjust for all groups within our multivariable Cox proportional hazards model.  
10 Second, we ran several analyses using restricted cohorts including restricting our cohort to  
11 patients eligible for HES/ONS linkage (i.e., patients with hospital and death certificate  
12 records), restricting to monotherapy users, restricting to a cohort of metformin monotherapy  
13 users who added the incretin-based therapy of interest or a sulfonylurea. Third, we added  
14 BMI (as a categorical variable) to Cox proportional hazards model given that weight may be a  
15 confounding factor.[41,42] Fourth, we used time-dependent variables to classify our  
16 exposures of interest throughout follow-up time. All analyses were conducted with R version  
17 3.3.3.  
18  
19  
20  
21  
22  
23  
24  
25  
26  
27  
28  
29  
30

## 31 Results

### 32 *DPP-4 Inhibitor Cohort*

33  
34 Within the DPP-4 inhibitor new user cohort, there were 6206 initiators of a DPP-4  
35 inhibitor and 22128 initiators of a sulfonylurea (Figure 1). The mean (standard deviation)  
36 follow-up time was 324 (362) days for DPP-4 inhibitor users and 299 (385) days for  
37 sulfonylurea users. Compared to sulfonylurea users, DPP-4 inhibitor users were on average  
38 younger, had fewer hospitalizations in the year prior to cohort entry, and less likely to have  
39 impaired kidney function. Patient characteristics were well-balanced following propensity  
40 score matching (Table 1). There were a total 264 patients identified with new-onset  
41 depression or self-harm.  
42  
43  
44  
45  
46  
47  
48

49 The incidence of depression or self-harm was 8.2 per 1000 person-years in DPP-4  
50 inhibitor users compared to 11.7 per 1000 person-years in sulfonylurea users (unadjusted  
51 hazard ratio (HR): 0.70 95% confidence interval (CI) 0.51-0.96 [table 3]). Similarly, the crude  
52 incidence rates were smaller for DPP-4 inhibitor users versus other comparators (10.0 vs.  
53 10.8 per 1000 person-years for TZDs; 9.8 vs. 20.7 for insulin users). However, following  
54  
55  
56  
57  
58  
59  
60

1 adjustment for potential confounding variables, there was no significant association between  
2 DPP-4 inhibitor use and the risk of depression or self-harm for all comparator groups  
3  
4 (sulfonylurea comparator: adjusted HR 0.80, 95% CI 0.57-1.13; TZD comparator: adjusted  
5 HR 1.17, 95% CI 0.70-1.96; insulin comparator: adjusted HR 0.98, 95% CI 0.53-1.83).  
6  
7 Appendices D and E show the results for the risks of depression and self-harm separately.  
8  
9

### 10 11 12 *GLP-1 Receptor Agonist Cohort*

13  
14 Within the GLP-1 receptor agonist cohort, there were 501 initiators of a GLP-1 receptor  
15 agonist and 16409 initiators of a sulfonylurea (Figure 1). The mean (standard deviation)  
16 follow-up time was 397 (409) days for GLP-1 receptor agonist users and 292 (373) days for  
17 sulfonylurea users. Compared to sulfonylurea users, GLP-1 receptor agonist users were on  
18 average younger, more likely female, used more drugs in the year prior to cohort entry, had a  
19 lower baseline HbA1c, more likely to have used several medications prior to cohort entry  
20 including insulin, SSRIs, or other antidepressant. Following propensity score matching,  
21 baseline patient characteristics were well-balanced (Table 2). There were a total 193 patients  
22 identified with new-onset depression or self-harm.  
23  
24

25  
26 The incidence rate of depression or self-harm was non-significantly higher for GLP-1  
27 receptor users compared to sulfonylurea users (18.2 vs. 13.6 per 1000 person-years;  
28 unadjusted HR 1.36, 95% CI 0.72-2.58; adjusted HR 1.25, 95% CI 0.63-2.50), TZDs (16.4 vs.  
29 12.5 per 1000 person-years; unadjusted HR 1.32, 95% CI 0.72-2.42; adjusted HR 1.18, 95%  
30 CI 0.53-2.65), and insulin users (13.6 vs. 20.7 per 1000 person-years; unadjusted HR 0.74,  
31 95% CI 0.35-1.56; adjusted HR 1.07, 95% CI 0.39-2.94). All measured associations remained  
32 non-significant following adjustment for potential confounders (Table 3). Appendix D shows  
33 the results for depression analyzed as a separate outcome. We were unable to analyze  
34 results for self-harm separately, due to small numbers of events (Appendix E).  
35  
36  
37  
38  
39  
40  
41  
42  
43  
44  
45

### 46 47 *Sensitivity Analyses*

48  
49 Figures 2 and 3 provide the number of events per treatment exposure group and  
50 measures of association for selected sensitivity analyses across the main DPP-4 inhibitor and  
51 GLP-1 receptor agonist cohorts. There were too few events to run a stable statistical model  
52 for all pre-specified sensitivity analyses (e.g. new monotherapy users); however, findings from  
53  
54  
55  
56  
57  
58  
59  
60

1  
2 models that were run were consistent with our main results suggesting that DPP-4 inhibitor  
3 use did not have an increased or decreased risk of new-onset depression (Appendix G to L).  
4  
5

### 6 7 *Patient and Public Involvement*

8 No patients were involved in any aspect of the study.  
9  
10

## 11 12 13 **Discussion**

14  
15 New users of DPP-4 inhibitors and new users of GLP-1 receptor agonists did not have  
16 an increased or decreased risk of a new diagnosis of depression or episode of self-harm.  
17 These findings extend our current knowledge regarding the relative safety of the incretin-  
18 based therapies used to manage hyperglycemia in patients with type 2 diabetes.  
19  
20

21  
22 The impetus for our study was the safety signal generated by randomized controlled  
23 trials and a case-report suggesting that incretin-based therapies may affect the risk of  
24 depression or self-harm. Specifically, early trial data found a 4-times greater risk of suicidal  
25 ideation or completed suicide in sitagliptin users vs glipizide users.[23,25] A higher incidence  
26 of depression was also observed in the long-term safety population among phase-3 clinical  
27 trial in sitagliptin 100mg users (13/429) compared to placebo (0/154); however, the incidence  
28 of psychiatric events was no different among pooled phase 3 studies (3.0% in sitagliptin  
29 100mg users; 2.4% in sitagliptin 200mg users, and 3.2% in placebo users).[24] Moreover, a  
30 case-report has also been published regarding exenatide-induced depression.[22]  
31  
32

33  
34 Despite our findings suggesting a lack of association between incretin-based agents  
35 and depression or self-harm, there is a substantial evidence-base from animal models that  
36 suggest incretin-based therapies may affect mood disorders. Anderberg and colleagues found  
37 differential effects of acute versus chronic exposure to a GLP-1 receptor agonist.[43] Acute  
38 activation of GLP-1 receptors was associated with anxiogenic effects, whereas chronic GLP-1  
39 receptor activation did not elicit anxiogenic effects in Sprague-Dawley rats. In fact, chronic  
40 exposure to a GLP-1 receptor agonist was associated with a decrease in depressive-like  
41 behavior. Furthermore, acute stimulation of GLP-1 receptors affected serotonin turnover and  
42 serotonin receptor expression in the amygdala; however, chronic stimulation did not affect  
43 serotonin turnover or receptor expression. In addition to effects on serotonin, activation of  
44 GLP-1 may have mood effects through impacting central dopamine levels.[44] A mice model  
45  
46  
47  
48  
49  
50  
51  
52  
53  
54  
55  
56  
57  
58  
59  
60

1 suggests that liraglutide, a GLP-1 receptor agonist, has antipsychotic properties possibly  
2 through its affecting dopamine activity in the brain.[45] Interestingly, the DPP-4 inhibitor  
3 sitagliptin, did not exhibit the same antipsychotic properties.  
4  
5

6  
7 Another possible mechanism by which glucose lowering therapies may affect mood  
8 disorders is through the reduction in inflammatory cytokines/mediators. Moulton et al reported  
9 improvement in depressive symptoms over 1-year in a cohort of 1735 newly diagnosed  
10 patients with type 2 diabetes.[10] The improvement in depressive symptoms measure by the  
11 PHQ-9 was independent of change in glycemic control and was correlated with a change in  
12 the inflammatory marker hs-CRP. Furthermore, a meta-analysis found that pioglitazone was  
13 associated with a reduction in symptoms of depression compared to placebo (pooled odds  
14 ratio = 3.3, 95% confidence interval 1.4 to 7.8).[11] A 12-week open-label study also found  
15 that pioglitazone was associated with a reduction in depression symptoms as well as a  
16 decrease in c-reactive protein and decreased insulin resistance.[12] Indeed, a population-  
17 based cross-sectional study found that numerous inflammatory markers (e.g., c-reactive  
18 protein, interleukin-1 receptor agonist, monocyte chemoattractant protein-1, white blood cell count,  
19 triglyceride) were associated with depression in patients with type 2 diabetes.[46] To further  
20 test this hypothesis among DPP-4 inhibitor users, there is an ongoing small clinical trial  
21 evaluating the effect of sitagliptin on symptoms of depression in the elderly (EudraCT  
22 Number: 2015-004527-32).[47]  
23  
24  
25  
26  
27  
28  
29  
30  
31  
32  
33

34  
35 Our study is subject to the standard limitations of observational cohort studies including  
36 the potential for residual and unmeasured confounding. Although we adjusted for over 70  
37 potential confounders using an HdPS approach, we were not able to capture all relevant  
38 potential confounders such as severity of depressive symptoms and patient level  
39 socioeconomic status. Our follow-up time was also limited (DPP-4 cohort mean follow-up time  
40 = 305 days; GLP-1 receptor agonist cohort mean follow-up = 296 days), therefore, it is  
41 possible that a longer time frame was required to detect an association. However, it would be  
42 expected that an effect on depression symptoms mediated by serotonin or dopaminergic  
43 central pathways would be apparent after 4 to 6 weeks or sooner. There were a limited  
44 number of self-harm events and our study was not powered to detect clinically relevant  
45 differences across exposure groups for this component of our composite outcome. Similarly,  
46 given the lower and upper limits of the 95% confidence intervals, our study cannot rule out  
47 small or moderate differences in the risk of depression across exposure groups.  
48  
49  
50  
51  
52  
53  
54  
55  
56  
57  
58  
59  
60

1  
2 Misclassification of the exposure or outcome variables of interest may have also impacted our  
3 findings. Our exposure variables of interest (incretin-based therapies) were measured based  
4 on primary care prescription records and therefore may overestimate true exposure due to  
5 primary and secondary non-adherence. In addition, prescriptions written by specialists are not  
6 captured in the CPRD. It is possible that when the incretin-based therapies were introduced  
7 they were more frequently prescribed by specialists and our study would miss the initial  
8 prescription, however, subsequent prescriptions written by general practitioners would be  
9 captured. Previous studies have shown that depression is likely underestimated using  
10 diagnostic codes, although positive predictive values have generally been greater than 90%  
11 using ICD-10 codes.[48] Under-ascertainment of depression would likely be non-differential  
12 between our exposure groups of interest and therefore bias our findings toward the null.  
13 Suicide and self-harm have also been shown to be underestimated using CPRD data and the  
14 use of linked mortality data via the Office of National Statistics improves the sensitivity for  
15 capturing suicide and self-harm; however, underreporting of events is still expected.[49] In  
16 addition, the role of incretin-based agents may have shifted over time whereby when they  
17 were first introduced to the market were not used commonly as 2<sup>nd</sup> line agents and  
18 sulfonylureas may have been used as first or second-line agents. We attempted to control for  
19 both temporal trends and timing of therapy by using calendar time, duration of and prior  
20 exposure of glucose-lowering therapies as covariates in the propensity score.

21 Our findings provide some reassurance regarding the safety of the incretin-based  
22 therapies in the treatment of type 2 diabetes. Specifically, our study results suggest that there  
23 is not a clinically relevant association between either DPP-4 inhibitors or GLP-1 receptor  
24 agonists and depression or self-harm.  
25  
26  
27  
28  
29  
30  
31  
32  
33  
34  
35  
36  
37  
38  
39  
40  
41  
42  
43  
44  
45  
46  
47  
48  
49  
50  
51  
52  
53  
54  
55  
56  
57  
58  
59  
60



1  
2 **Authors' Contributions:** JMG, EC, WKM, LKT and SRM, were involved in the concept and  
3 design of the study. JMG was responsible for drafting the first version of the manuscript. All  
4 authors contributed to the interpretation of data. JMG, EC, WKM, and LKT provided revisions  
5 to the manuscript. JMG will act as guarantor for the study.  
6  
7  
8  
9

10 **Acknowledgements:** JMG is supported as a New Investigator Award from the Canadian  
11 Institute of Health Research and a Clinician Scientist Award from Diabetes Canada. This  
12 study is based in part on data from the Clinical Practice Research Datalink obtained under  
13 licence from the UK Medicines and Healthcare products Regulatory Agency. However, the  
14 interpretation and conclusions contained in this study are those of the author/s alone.  
15  
16  
17  
18  
19

20 **Funding Support:** This work was supported by an operating grant from the Canadian  
21 Institute for Health Research (FRN173599 – 287647).  
22  
23  
24  
25

26 **Competing Interest:** All authors have completed the Unified Competing Interest form at  
27 [www.icmje.org/coi\\_disclosure.pdf](http://www.icmje.org/coi_disclosure.pdf) (available on request from the corresponding author) and  
28 declare no support from any organization for the submitted work; no financial relationships  
29 that may be relevant to the submitted work; and no other relationships or activities that could  
30 appear to have influence the submitted work.  
31  
32  
33  
34  
35

36 **Ethical approval:** This study was approved by the Independent Scientific Advisory  
37 Committee (ISAC 15\_016RARA) and received approval from the Health Research Ethics  
38 Board at Memorial University.  
39  
40  
41  
42

43 **Copyright:** The Corresponding Author has the right to grant on behalf of all authors and  
44 does grant on behalf of all authors, a [worldwide licence](#) to the Publishers and its licensees in  
45 perpetuity, in all forms, formats and media (whether known now or created in the future), to i)  
46 publish, reproduce, distribute, display and store the Contribution, ii) translate the Contribution  
47 into other languages, create adaptations, reprints, include within collections and create  
48 summaries, extracts and/or, abstracts of the Contribution, iii) create any other derivative  
49 work(s) based on the Contribution, iv) to exploit all subsidiary rights in the Contribution, v) the  
50 inclusion of electronic links from the Contribution to third party material where-ever it may be  
51  
52  
53  
54  
55  
56  
57  
58  
59  
60

1  
2 located; and, vi) licence any third party to do any or all of the above.  
3  
4

5 **Transparency:** The lead author (the manuscript's guarantor) affirms that the manuscript is an  
6 honest, accurate, and transparent account of the study being reported; that no important  
7 aspects of the study have been omitted; and that any discrepancies from the study as  
8 planned (and, if relevant, registered) have been explained.  
9  
10  
11  
12

13  
14 **Data Sharing:** no additional data available.  
15  
16  
17  
18  
19  
20  
21  
22  
23  
24  
25  
26  
27  
28  
29  
30  
31  
32  
33  
34  
35  
36  
37  
38  
39  
40  
41  
42  
43  
44  
45  
46  
47  
48  
49  
50  
51  
52  
53  
54  
55  
56  
57  
58  
59  
60



1  
2  
3  
4  
5  
6  
7  
8  
9  
10  
11  
12  
13  
14  
15  
16  
17  
18  
19  
20  
21  
22  
23  
24  
25  
26  
27  
28  
29  
30  
31  
32  
33  
34  
35  
36  
37  
38  
39  
40  
41  
42  
43  
44  
45  
46  
47  
48  
49  
50  
51  
52  
53  
54  
55  
56  
57  
58  
59  
60  

## REFERENCES

- 1 Holt RIG, Groot M de, Lucki I, *et al.* NIDDK International Conference Report on Diabetes and Depression: Current Understanding and Future Directions. *Diabetes Care* 2014;**37**:2067–77. doi:10.2337/dc13-2134
- 2 Association of Depression and Diabetes Complications: A Meta... : Psychosomatic Medicine. LWW. [http://journals.lww.com/psychosomaticmedicine/Fulltext/2001/07000/Association\\_of\\_Depression\\_and\\_Diabetes.15.aspx](http://journals.lww.com/psychosomaticmedicine/Fulltext/2001/07000/Association_of_Depression_and_Diabetes.15.aspx) (accessed 18 Apr 2017).
- 3 Ali S, Stone M, Skinner TC, *et al.* The association between depression and health-related quality of life in people with type 2 diabetes: a systematic literature review. *Diabetes Metab Res Rev* 2010;**26**:75–89. doi:10.1002/dmrr.1065
- 4 Holt RIG, de Groot M, Golden SH. Diabetes and Depression. *Curr Diab Rep* 2014;**14**:491. doi:10.1007/s11892-014-0491-3
- 5 Knol MJ, Twisk JWR, Beekman ATF, *et al.* Depression as a risk factor for the onset of type 2 diabetes mellitus. A meta-analysis. *Diabetologia* 2006;**49**:837. doi:10.1007/s00125-006-0159-x
- 6 Golden SH, Lazo M, Carnethon M, *et al.* Examining a Bidirectional Association Between Depressive Symptoms and Diabetes. *JAMA J Am Med Assoc* 2008;**299**:2751–9. doi:10.1001/jama.299.23.2751
- 7 Collaboration ERF, Seshasai SRK, Kaptoge S, *et al.* Diabetes mellitus, fasting glucose, and risk of cause-specific death. *N Engl J Med* 2011;**364**:829–841. doi:10.1056/NEJMoa1008862
- 8 Singhal A, Ross J, Seminog O, *et al.* Risk of self-harm and suicide in people with specific psychiatric and physical disorders: comparisons between disorders using English national record linkage. *J R Soc Med* 2014;**107**:194–204. doi:10.1177/0141076814522033
- 9 Wang Y, Tang S, Xu S, *et al.* Association between diabetes and risk of suicide death: A meta-analysis of 3 million participants. *Compr Psychiatry* 2016;**71**:11–6. doi:10.1016/j.comppsy.2016.08.006
- 10 Moulton CD, Pickup JC, Amiel SA, *et al.* Investigating incretin-based therapies as a novel treatment for depression in type 2 diabetes: Findings from the South London Diabetes (SOUL-D) Study. *Prim Care Diabetes* 2016;**10**:156–9. doi:10.1016/j.pcd.2015.06.003
- 11 Colle R, de Larminat D, Rotenberg S, *et al.* Pioglitazone could induce remission in major depression: a meta-analysis. *Neuropsychiatr Dis Treat* 2016;**13**:9–16. doi:10.2147/NDT.S121149
- 12 Kemp DE, Ismail-Beigi F, Ganocy SJ, *et al.* Use of Insulin Sensitizers for the Treatment of Major Depressive Disorder: A Pilot Study of Pioglitazone for Major Depression Accompanied by Abdominal Obesity. *J Affect Disord* 2012;**136**:1164–73. doi:10.1016/j.jad.2011.06.033
- 13 Wahlqvist ML, Lee M-S, Chuang S-Y, *et al.* Increased risk of affective disorders in type 2 diabetes is minimized by sulfonylurea and metformin combination: a population-based cohort study. *BMC Med* 2012;**10**:150. doi:10.1186/1741-7015-10-150

- 1  
2 14 Berge LI, Riise T, Tell GS, *et al.* Depression in Persons with Diabetes by Age and Antidiabetic  
3 Treatment: A Cross-Sectional Analysis with Data from the Hordaland Health Study. *PLoS ONE*  
4 2015;**10**. doi:10.1371/journal.pone.0127161  
5
- 6 15 Bode BW, Testa MA, Magwire M, *et al.* Patient-reported outcomes following treatment with the  
7 human GLP-1 analogue liraglutide or glimepiride in monotherapy: results from a randomized  
8 controlled trial in patients with type 2 diabetes. *Diabetes Obes Metab* 2010;**12**:604–12.  
9 doi:10.1111/j.1463-1326.2010.01196.x  
10
- 11 16 Colle R, de Larminat D, Rotenberg S, *et al.* Pioglitazone could induce remission in major  
12 depression: a meta-analysis. *Neuropsychiatr Dis Treat* 2016;**13**:9–16. doi:10.2147/NDT.S121149  
13  
14
- 15 17 Kemp DE, Ismail-Beigi F, Ganocy SJ, *et al.* Use of Insulin Sensitizers for the Treatment of Major  
16 Depressive Disorder: A Pilot Study of Pioglitazone for Major Depression Accompanied by  
17 Abdominal Obesity. *J Affect Disord* 2012;**136**:1164–73. doi:10.1016/j.jad.2011.06.033  
18
- 19 18 Wahlqvist ML, Lee M-S, Chuang S-Y, *et al.* Increased risk of affective disorders in type 2 diabetes  
20 is minimized by sulfonylurea and metformin combination: a population-based cohort study. *BMC*  
21 *Med* 2012;**10**:150. doi:10.1186/1741-7015-10-150  
22  
23
- 24 19 Berge LI, Riise T, Tell GS, *et al.* Depression in Persons with Diabetes by Age and Antidiabetic  
25 Treatment: A Cross-Sectional Analysis with Data from the Hordaland Health Study. *PLoS ONE*  
26 2015;**10**. doi:10.1371/journal.pone.0127161  
27
- 28 20 Alvarez E, Roncero I, Chowen JA, *et al.* Expression of the glucagon-like peptide-1 receptor gene in  
29 rat brain. *J Neurochem* 1996;**66**:920–7.  
30
- 31 21 Lockie SH. Glucagon-Like Peptide-1 Receptor in the Brain: Role in Neuroendocrine Control of  
32 Energy Metabolism and Treatment Target for Obesity. *J Neuroendocrinol* 2013;**25**:597–604.  
33 doi:10.1111/jne.12039  
34  
35
- 36 22 Kohen I, Lester P. Exenatide-induced depression in a geriatric patient. *Int J Geriatr Psychiatry*  
37 2008;**23**:443–4.  
38
- 39 23 European Medicines Agency. Januvia: European Public Assessment Report (EPAR) - Scientific  
40 Discussion. European Medicines Agency 2007.  
41  
42
- 43 24 U.S. Food and Drug Administration - Center For Drug Evaluation and Research. Application  
44 number: 21-995 Medical review. 2006.  
45 [http://www.accessdata.fda.gov/drugsatfda\\_docs/nda/2006/021995s000\\_MedR.pdf](http://www.accessdata.fda.gov/drugsatfda_docs/nda/2006/021995s000_MedR.pdf) (accessed 24  
46 Nov 2014).  
47
- 48 25 Prescrire Editorial Staff. Sitagliptin. Type 2 diabetes: limited efficacy, too many unknown risks.  
49 *Prescrire Int* 2008;**17**:12–5.  
50
- 51 26 Maes M, De Meester I, Scharpe S, *et al.* Alterations in plasma dipeptidyl peptidase IV enzyme  
52 activity in depression and schizophrenia: effects of antidepressants and antipsychotic drugs. *Acta*  
53 *Psychiatr Scand* 1996;**93**.  
54  
55  
56  
57  
58  
59  
60

- 1  
2 27 Maes M, De Meester I, Vanhoof G, *et al.* Decreased serum dipeptidyl peptidase IV activity in  
3 major depression. *Biol Psychiatry* 1991;**30**:577–86.  
4
- 5 28 Maes M, De Meester I, Verkerk R, *et al.* Lower serum dipeptidyl peptidase IV activity in treatment  
6 resistant major depression: relationships with immune-inflammatory markers.  
7 *Psychoneuroendocrinology* 1997;**22**.  
8
- 9 29 Grant P, Lipscomb D, Quin J. Psychological and quality of life changes in patients using GLP-1  
10 analogues. *J Diabetes Complications* 2011;**25**:244–6. doi:10.1016/j.jdiacom.2011.03.002  
11
- 12 30 Gamble J-M, Thomas JM, Twells LK, *et al.* Comparative effectiveness of incretin-based therapies  
13 and the risk of death and cardiovascular events in 38,233 metformin monotherapy users: *Medicine*  
14 (*Baltimore*) 2016;**95**:e3995. doi:10.1097/MD.0000000000003995  
15
- 16 31 Herrett E, Gallagher AM, Bhaskaran K, *et al.* Data Resource Profile: Clinical Practice Research  
17 Datalink (CPRD). *Int J Epidemiol* 2015;**44**:827–36. doi:10.1093/ije/dyv098  
18
- 19 32 Herrett E, Thomas SL, Schoonen WM, *et al.* Validation and validity of diagnoses in the General  
20 Practice Research Database: a systematic review. *Br J Clin Pharmacol* 2010;**69**:4–14.  
21 doi:10.1111/j.1365-2125.2009.03537.x  
22
- 23 33 Jick SS, Kaye JA, Vasilakis-Scaramozza C, *et al.* Validity of the general practice research database.  
24 *Pharmacotherapy* 2003;**23**:686–689.  
25
- 26 34 Williams T, Van Staa T, Puri S, *et al.* Recent advances in the utility and use of the General Practice  
27 Research Database as an example of a UK Primary Care Data resource. *Ther Adv Drug Saf*  
28 2012;**3**:89–99. doi:10.1177/2042098611435911  
29
- 30 35 Bornand D, Toovey S, Jick SS, *et al.* The risk of new onset depression in association with influenza  
31 – A population-based observational study. *Brain Behav Immun* 2016;**53**:131–7.  
32 doi:10.1016/j.bbi.2015.12.005  
33
- 34 36 Hagberg KW, Li L, Peng M, *et al.* Incidence rates of suicidal behaviors and treated depression in  
35 patients with and without psoriatic arthritis using the Clinical Practice Research Datalink. *Mod*  
36 *Rheumatol* 2016;**26**:774–9. doi:10.3109/14397595.2015.1136726  
37
- 38 37 Jick H, Kaye JA, Jick SS. Antidepressants and the Risk of Suicidal Behaviors. *JAMA*  
39 2004;**292**:338–43. doi:10.1001/jama.292.3.338  
40
- 41 38 Thomas KH, Martin RM, Davies NM, *et al.* Smoking cessation treatment and risk of depression,  
42 suicide, and self harm in the Clinical Practice Research Datalink: prospective cohort study. *BMJ*  
43 2013;**347**:f5704–f5704. doi:10.1136/bmj.f5704  
44
- 45 39 Welk B, McArthur E, Ordon M, *et al.* Association of Suicidality and Depression With 5 $\alpha$ -  
46 Reductase Inhibitors. *JAMA Intern Med* 2017;**177**:683–91. doi:10.1001/jamainternmed.2017.0089  
47
- 48 40 Schneeweiss S, Rassen JA, Glynn RJ, *et al.* High-dimensional propensity score adjustment in  
49 studies of treatment effects using health care claims data. *Epidemiology* 2009;**20**:512–522.  
50 doi:10.1097/EDE.0b013e3181a663cc  
51  
52  
53  
54  
55  
56  
57  
58  
59  
60

- 1  
2 41 Sevilla-González M del R, Quintana-Mendoza BM, Aguilar-Salinas CA. Interaction Between  
3 Depression, Obesity, and Type 2 Diabetes: A Complex Picture. *Arch Med Res* 2017;**48**:582–91.  
4 doi:10.1016/j.arcmed.2018.02.004  
5
- 6 42 Svenningsson I, Björkelund C, Marklund B, *et al.* Anxiety and depression in obese and normal-  
7 weight individuals with diabetes type 2: A gender perspective. *Scand J Caring Sci*;**26**:349–54.  
8 doi:10.1111/j.1471-6712.2011.00940.x  
9
- 10 43 Anderberg RH, Richard JE, Hansson C, *et al.* GLP-1 is both anxiogenic and antidepressant;  
11 divergent effects of acute and chronic GLP-1 on emotionality. *Psychoneuroendocrinology*  
12 2016;**65**:54–66. doi:10.1016/j.psyneuen.2015.11.021  
13  
14
- 15 44 Anderberg RH, Anefors C, Bergquist F, *et al.* Dopamine signaling in the amygdala, increased by  
16 food ingestion and GLP-1, regulates feeding behavior. *Physiol Behav* 2014;**136**:135–44.  
17 doi:10.1016/j.physbeh.2014.02.026  
18
- 19 45 Dixit TS, Sharma AN, Lucot JB, *et al.* Antipsychotic-like effect of GLP-1 agonist liraglutide but  
20 not DPP-IV inhibitor sitagliptin in mouse model for psychosis. *Physiol Behav* 2013;**114–115**:38–  
21 41. doi:10.1016/j.physbeh.2013.03.008  
22  
23
- 24 46 Laake J-PS, Stahl D, Amiel SA, *et al.* The Association Between Depressive Symptoms and  
25 Systemic Inflammation in People With Type 2 Diabetes: Findings From the South London  
26 Diabetes Study. *Diabetes Care* 2014;:DC\_132522. doi:10.2337/dc13-2522  
27
- 28 47 Pilot randomised controlled trial of SITAgliptin for Depressive Symptoms in type 2 diabetes  
29 (EudraCT Number: 2015-004527-32). [https://www.clinicaltrialsregister.eu/ctr-](https://www.clinicaltrialsregister.eu/ctr-search/search?query=2015-004527-32)  
30 [search/search?query=2015-004527-32](https://www.clinicaltrialsregister.eu/ctr-search/search?query=2015-004527-32) (accessed 7 Dec 2017).  
31  
32
- 33 48 Fiest KM, Jette N, Quan H, *et al.* Systematic review and assessment of validated case definitions  
34 for depression in administrative data. *BMC Psychiatry* 2014;**14**:289.  
35
- 36 49 Thomas KH, Davies N, Metcalfe C, *et al.* Validation of suicide and self-harm records in the  
37 Clinical Practice Research Datalink: Validation of suicide and self-harm records. *Br J Clin*  
38 *Pharmacol* 2013;**76**:145–57. doi:10.1111/bcp.12059  
39  
40  
41  
42  
43  
44  
45  
46  
47  
48  
49  
50  
51  
52  
53  
54  
55  
56  
57  
58  
59  
60

## TABLES

**Table 1. Patient Characteristics of New-user DPP-4 Inhibitor Cohort Before and After Propensity Score Matching, and GLP-1 Receptor Agonist Cohorts.**

|                                                          | DPP4 Inhibitor New User Cohort Before Propensity Score Matching |                 | DPP4 Inhibitor New User Cohort After Propensity Score Matching |                |
|----------------------------------------------------------|-----------------------------------------------------------------|-----------------|----------------------------------------------------------------|----------------|
|                                                          | DPP-4i<br>(n=6206)                                              | SU<br>(n=22128) | DPP-4i<br>(n=6008)                                             | SU<br>(n=6008) |
| Age in yrs (sd)                                          | 58(12.2)                                                        | 60.5(13.8)      | 58.1(12.2)                                                     | 58.2(12.5)     |
| Female                                                   | 2258(36.4%)                                                     | 8107(36.6%)     | 2189(36.4%)                                                    | 2187(36.4%)    |
| Measure of deprivation                                   |                                                                 |                 |                                                                |                |
| Least                                                    | 624(10.1%)                                                      | 2492(11.3%)     | 603(10%)                                                       | 594(9.9%)      |
| Most                                                     | 615(9.9%)                                                       | 2342(10.6%)     | 603(10%)                                                       | 614(10.2%)     |
| Unknown                                                  | 2862(46.1%)                                                     | 8780(39.7%)     | 2739(45.6%)                                                    | 2683(44.7%)    |
| Diabetes duration in yrs (sd)                            | 2.0(1.8)                                                        | 1.0(1.5)        | 1.9(1.7)                                                       | 1.9(1.8)       |
| Body Mass Index >30                                      | 4162(67.1%)                                                     | 10661(48.2%)    | 3994(66.5%)                                                    | 3978(66.2%)    |
| Number of hospitalizations in year prior to cohort entry |                                                                 |                 |                                                                |                |
| 0                                                        | 5647(91%)                                                       | 18516(83.7%)    | 5452(90.7%)                                                    | 5470(91%)      |
| 1                                                        | 378(6.1%)                                                       | 2105(9.5%)      | 375(6.2%)                                                      | 379(6.3%)      |
| 2                                                        | 109(1.8%)                                                       | 784(3.5%)       | 109(1.8%)                                                      | 92(1.5%)       |
| 3+                                                       | 72(1.2%)                                                        | 723(3.3%)       | 72(1.2%)                                                       | 67(1.1%)       |
| Number of drugs in year prior to cohort entry            |                                                                 |                 |                                                                |                |
| 0-4                                                      | 721(11.6%)                                                      | 3098(14%)       | 703(11.7%)                                                     | 671(11.2%)     |
| 5-10                                                     | 3204(51.6%)                                                     | 10379(46.9%)    | 3081(51.3%)                                                    | 3119(51.9%)    |
| 11+                                                      | 2281(36.8%)                                                     | 8651(39.1%)     | 2224(37%)                                                      | 2218(36.9%)    |
| HbA1c                                                    |                                                                 |                 |                                                                |                |
| <6.5%                                                    | 242(3.9%)                                                       | 1393(6.3%)      | 238(4%)                                                        | 233(3.9%)      |
| 6.5-7.5%                                                 | 1104(17.8%)                                                     | 3349(15.1%)     | 1049(17.5%)                                                    | 1053(17.5%)    |
| 7.5-9%                                                   | 2831(45.6%)                                                     | 7121(32.2%)     | 2701(45%)                                                      | 2694(44.8%)    |
| 9%+                                                      | 2000(32.2%)                                                     | 9833(44.4%)     | 1991(33.1%)                                                    | 2007(33.4%)    |
| Unknown                                                  | 29(<1%)                                                         | 432(2%)         | 29(<1%)                                                        | 21(<1%)        |
| eGFR <60                                                 | 883(14.2%)                                                      | 4429(20%)       | 857(14.3%)                                                     | 890(14.8%)     |
| Diagnoses in year prior to cohort entry                  |                                                                 |                 |                                                                |                |
| Heart Failure                                            | 68(1.1%)                                                        | 369(1.7%)       | 68(1.1%)                                                       | 51(<1%)        |
| Hypertension                                             | 1095(17.6%)                                                     | 4475(20.2%)     | 1066(17.7%)                                                    | 1087(18.1%)    |
| Dyslipidemia                                             | 213(3.4%)                                                       | 1093(4.9%)      | 213(3.5%)                                                      | 212(3.5%)      |
| Ischemic heart                                           | 174(2.8%)                                                       | 1033(4.7%)      | 171(2.8%)                                                      | 168(2.8%)      |
| Peripheral vascular                                      | 25(<1%)                                                         | 145(<1%)        | 25(<1%)                                                        | 24(<1%)        |
| Prescription drug use in year prior to cohort entry      |                                                                 |                 |                                                                |                |
| Metformin                                                | 5775(93.1%)                                                     | 16534(74.7%)    | 5578(92.8%)                                                    | 5638(93.8%)    |
| Acarbose                                                 | S                                                               | 8(<1%)          | S                                                              | S              |
| SGLT2 inhibitors                                         | 38(<1%)                                                         | 93(<1%)         | 38(<1%)                                                        | 40(<1%)        |
| Meglitinide                                              | 47(<1%)                                                         | 39(<1%)         | 38(<1%)                                                        | 29(<1%)        |
| Thiazolidinedione                                        | 252(4.1%)                                                       | 403(1.8%)       | 222(3.7%)                                                      | 209(3.5%)      |
| Insulin                                                  | 82(1.3%)                                                        | 331(1.5%)       | 80(1.3%)                                                       | 86(1.4%)       |
| Hypnotic                                                 | 332(5.3%)                                                       | 1486(6.7%)      | 328(5.5%)                                                      | 324(5.4%)      |
| Mood                                                     | 85(1.4%)                                                        | 280(1.3%)       | 81(1.3%)                                                       | 83(1.4%)       |
| Anticonvulsant                                           | 271(4.4%)                                                       | 832(3.8%)       | 260(4.3%)                                                      | 266(4.4%)      |
| Antipsychotics                                           | 176(2.8%)                                                       | 829(3.7%)       | 172(2.9%)                                                      | 171(2.8%)      |

S = suppressed due to low number of events



**Table 2. Patient Characteristics of New-user GLP-1 Receptor Agonist Cohort Before and After Propensity Score Matching.**

|                                                          | GLP-1 Receptor Agonist New User Cohort Before Propensity Score Matching |                 | GLP-1 Receptor Agonist New User Cohort After Propensity Score Matching |               |
|----------------------------------------------------------|-------------------------------------------------------------------------|-----------------|------------------------------------------------------------------------|---------------|
|                                                          | GLP-1RA<br>(n=501)                                                      | SU<br>(n=16409) | GLP-1RA<br>(n=488)                                                     | SU<br>(n=488) |
| Age in yrs (sd)                                          | 49.4(11.3)                                                              | 57.8(12.9)      | 49.7(11.2)                                                             | 49.2(12.6)    |
| Female                                                   | 204(40.7%)                                                              | 6021(36.7%)     | 198(40.6%)                                                             | 174(35.7%)    |
| Measure of                                               |                                                                         |                 |                                                                        |               |
| Least                                                    | 40(8%)                                                                  | 1688(10.3%)     | 40(8.2%)                                                               | 29(5.9%)      |
| Most                                                     | 56(11.2%)                                                               | 1770(10.8%)     | 56(11.5%)                                                              | 52(10.7%)     |
| Unknown                                                  | 240(47.9%)                                                              | 6784(41.3%)     | 230(47.1%)                                                             | 214(43.9%)    |
| Diabetes duration in yrs (sd)                            | 1.7(1.6)                                                                | 1.2(1.6)        | 1.7(1.6)                                                               | 1.7(1.8)      |
| Body Mass Index>30                                       | 470(93.8%)                                                              | 10481(63.9%)    | 458(93.9%)                                                             | 452(92.6%)    |
| Number of hospitalizations in year prior to cohort entry |                                                                         |                 |                                                                        |               |
| 0                                                        | 456(91%)                                                                | 14170(86.4%)    | 445(91.2%)                                                             | 437(89.5%)    |
| 1                                                        | 29(5.8%)                                                                | 1344(8.2%)      | 28(5.7%)                                                               | 27(5.5%)      |
| 2                                                        | 10(2%)                                                                  | 499(3%)         | 9(1.8%)                                                                | 17(3.5%)      |
| 3+                                                       | 6(1.2%)                                                                 | 396(2.4%)       | 6(1.2%)                                                                | 7(1.4%)       |
| Number of drugs in year prior to cohort entry            |                                                                         |                 |                                                                        |               |
| 0-4                                                      | 17(3.4%)                                                                | 1660(10.1%)     | 17(3.5%)                                                               | 18(3.7%)      |
| 5-10                                                     | 195(38.9%)                                                              | 7899(48.1%)     | 192(39.3%)                                                             | 208(42.6%)    |
| 11+                                                      | 289(57.7%)                                                              | 6850(41.7%)     | 279(57.2%)                                                             | 262(53.7%)    |
| HbA1c                                                    |                                                                         |                 |                                                                        |               |
| <6.5%                                                    | 66(13.2%)                                                               | 1085(6.6%)      | 62(12.7%)                                                              | 66(13.5%)     |
| 6.5-7.5%                                                 | 99(19.8%)                                                               | 2593(15.8%)     | 97(19.9%)                                                              | 99(20.3%)     |
| 7.5-9%                                                   | 150(29.9%)                                                              | 5357(32.6%)     | 145(29.7%)                                                             | 134(27.5%)    |
| 9%+                                                      | 179(35.7%)                                                              | 7068(43.1%)     | 177(36.3%)                                                             | 178(36.5%)    |
| Unknown                                                  | 7(1.4%)                                                                 | 306(1.9%)       | 7(1.4%)                                                                | 11(2.3%)      |
| eGFR <60                                                 | 36(7.2%)                                                                | 2821(17.2%)     | 35(7.2%)                                                               | 40(8.2%)      |
| Diagnoses in year prior to cohort entry                  |                                                                         |                 |                                                                        |               |
| Heart Failure                                            | 5(1%)                                                                   | 244(1.5%)       | 5(1%)                                                                  | 6(1.2%)       |
| Hypertension                                             | 107(21.4%)                                                              | 3398(20.7%)     | 106(21.7%)                                                             | 104(21.3%)    |
| Dyslipidemia                                             | 16(3.2%)                                                                | 771(4.7%)       | 16(3.3%)                                                               | 23(4.7%)      |
| Ischemic heart                                           | 11(2.2%)                                                                | 644(3.9%)       | 11(2.3%)                                                               | 9(1.8%)       |
| Peripheral                                               | S                                                                       | 106(<1%)        | S                                                                      | S             |
| Prescription drug use in year prior to cohort entry      |                                                                         |                 |                                                                        |               |
| Metformin                                                | 457(91.2%)                                                              | 13542(82.5%)    | 445(91.2%)                                                             | 449(92%)      |
| Acarbose                                                 | 2(<1%)                                                                  | 7(<1%)          | 1(<1%)                                                                 | 1(<1%)        |
| SGLT2 inhibitors                                         | 5(1%)                                                                   | 87(<1%)         | 5(1%)                                                                  | 5(1%)         |
| Meglitinide                                              | 11(2.2%)                                                                | 39(<1%)         | 10(2%)                                                                 | 10(2%)        |
| Thiazolidinedione                                        | 38(7.6%)                                                                | 376(2.3%)       | 38(7.8%)                                                               | 41(8.4%)      |
| Insulin                                                  | 65(13%)                                                                 | 307(1.9%)       | 55(11.3%)                                                              | 59(12.1%)     |
| Hypnotic                                                 | 32(6.4%)                                                                | 1093(6.7%)      | 32(6.6%)                                                               | 35(7.2%)      |
| Mood                                                     | 10(2%)                                                                  | 228(1.4%)       | 10(2%)                                                                 | 8(1.6%)       |
| Anticonvulsant                                           | 33(6.6%)                                                                | 682(4.2%)       | 31(6.4%)                                                               | 32(6.6%)      |
| Antipsychotics                                           | 12(2.4%)                                                                | 507(3.1%)       | <b>12(2.5%)</b>                                                        | 12(2.5%)      |

S = suppressed due to low number of events

**Table 3. Measures of frequency and association for depression or self-harm in new-users of DPP-4 Inhibitors (DPP4i) or new-users of GLP-1 receptor agonists (GLP1ra) vs. sulfonylureas (SU), thiazolidinediones (TZD), or insulin.**

|                                         | DPP4 Inhibitor New User Cohort |                 | GLP1 Receptor Agonist New User Cohort |                 |
|-----------------------------------------|--------------------------------|-----------------|---------------------------------------|-----------------|
| <b>COMPARATOR: SU</b>                   |                                |                 |                                       |                 |
|                                         | DPP4i                          | SU              | GLP1ra                                | SU              |
| Number of patients                      | 6206                           | 22128           | 501                                   | 16409           |
| Person-years of follow-up               | 5589                           | 18596           | 549                                   | 13418           |
| Number of Events                        | 46                             | 218             | 10                                    | 183             |
| Incidence per 1000 person-years (95%CI) | 8.2(6.2-11)                    | 11.7(10.3-13.4) | 18.2(10-33.5)                         | 13.6(11.8-15.8) |
| Crude HR                                | 0.70(0.51-0.96)                | -ref-           | 1.36(0.72-2.58)                       | -ref-           |
| Adjusted HR                             | 0.80(0.57-1.13)                | -ref-           | 1.25(0.63-2.50)                       | -ref-           |
| <b>COMPARATOR: TZD</b>                  |                                |                 |                                       |                 |
|                                         | DPP4i                          | TZD             | GLP1ra                                | TZD             |
| Number of patients                      | 9565                           | 2512            | 851                                   | 2011            |
| Person-years of follow-up               | 9190                           | 2786            | 1035                                  | 2165            |
| Number of Events                        | 92                             | 30              | 17                                    | 27              |
| Incidence per 1000 person-years (95%CI) | 10.0(8.2-12.3)                 | 10.8(7.6-15.4)  | 16.4(10.3-26.3)                       | 12.5(8.6-18.1)  |
| Crude HR                                | 0.90(0.59-1.36)                | -ref-           | 1.32(0.72-2.42)                       | -ref-           |
| Adjusted HR                             | 1.17(0.70-1.96)                | -ref-           | 1.18(0.53-2.65)                       | -ref-           |
| <b>COMPARATOR: INSULIN</b>              |                                |                 |                                       |                 |
|                                         | DPP4i                          | Insulin         | GLP1ra                                | Insulin         |
| Number of patients                      | 10049                          | 3600            | 854                                   | 2745            |
| Person-years of follow-up               | 9878                           | 1161            | 1033                                  | 919             |
| Number of Events                        | 97                             | 24              | 14                                    | 19              |
| Incidence per 1000 person-years (95%CI) | 9.8(8.1-12)                    | 20.7(13.9-30.8) | 13.6(8.1-22.7)                        | 20.7(13.3-32.3) |
| Crude HR                                | 0.54(0.34-0.87)                | -ref-           | 0.74(0.35-1.56)                       | -ref-           |
| Adjusted HR                             | 0.98(0.53-1.83)                | -ref-           | 1.07(0.39-2.94)                       | -ref-           |

## FIGURES

**Figure 1. Flow Diagram to Identify Initiators of DPP-4 Inhibitors and Sulfonylureas (DPP-4 Inhibitor Cohort), and GLP-1 Receptor Agonists and Sulfonylureas (GLP-1 Receptor Agonist Cohort)**

**Figure 2. Hazard Ratios and Number of Events within DPP-4 Inhibitor (DPP4i) and Sulfonylurea (SU) Users Across Sensitivity Analysis**

**Figure 3. Hazard Ratios and Number of Events within GLP-1 Receptor Agonist (GLP1ra) and Sulfonylurea (SU) Users Across Sensitivity Analysis**



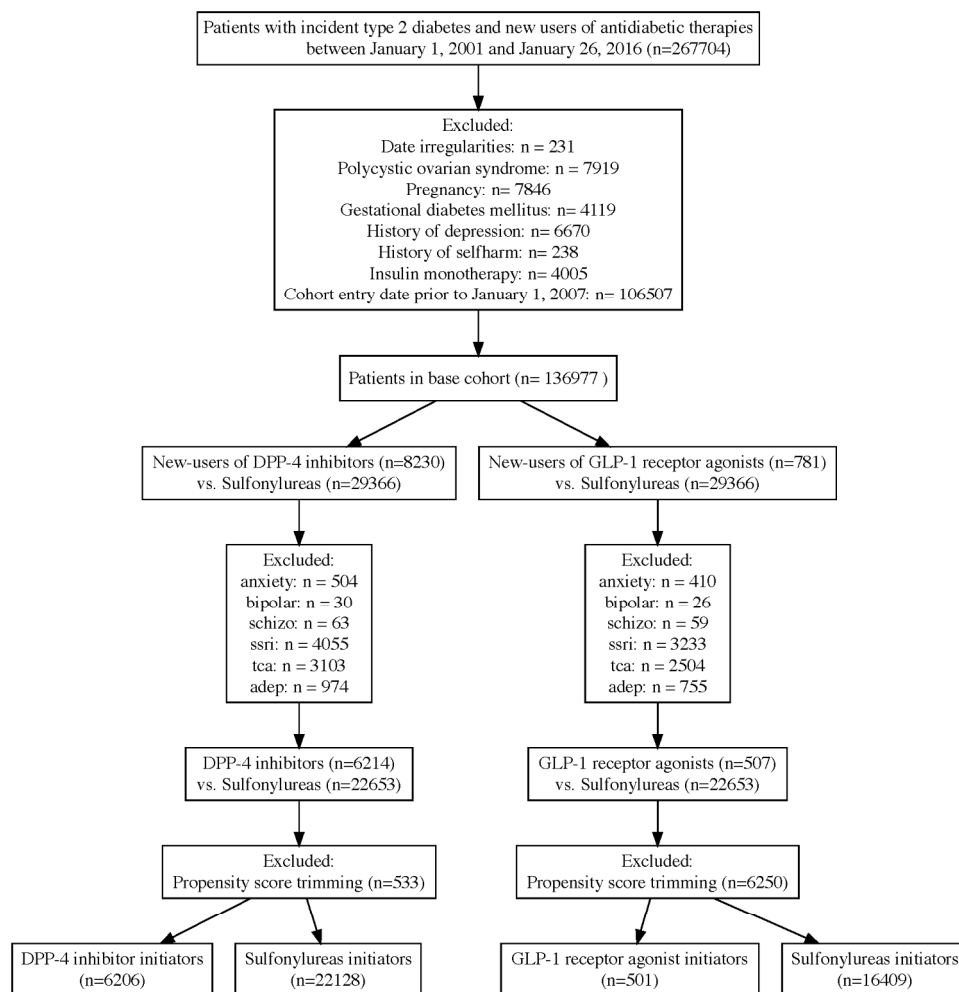

Flow Diagram to Identify Initiators of DPP-4 Inhibitors and Sulfonylureas (DPP-4 Inhibitor Cohort), and GLP-1 Receptor Agonists and Sulfonylureas (GLP-1 Receptor Agonist Cohort)

177x181mm (300 x 300 DPI)

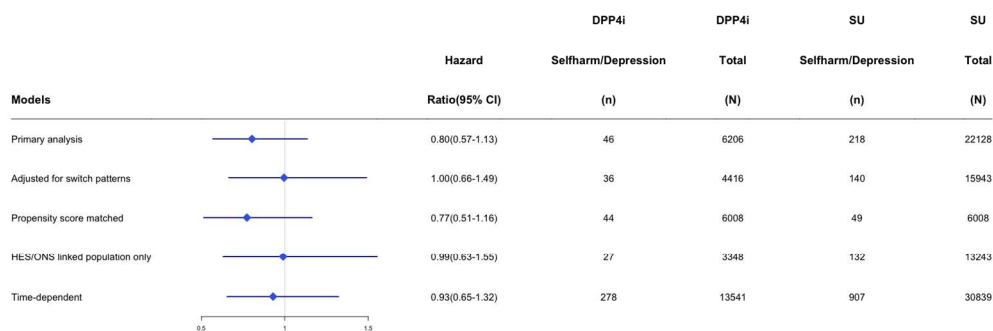

Hazard Ratios and Number of Events within DPP-4 Inhibitor (DPP4i) and Sulfonylurea (SU) Users Across Sensitivity Analysis

peer review only

1  
2  
3  
4  
5  
6  
7  
8  
9  
10  
11  
12  
13  
14  
15  
16  
17  
18  
19  
20  
21  
22  
23  
24  
25  
26  
27  
28  
29  
30  
31  
32  
33  
34  
35  
36  
37  
38  
39  
40  
41  
42  
43  
44  
45  
46  
47  
48  
49  
50  
51  
52  
53  
54  
55  
56  
57  
58  
59  
60

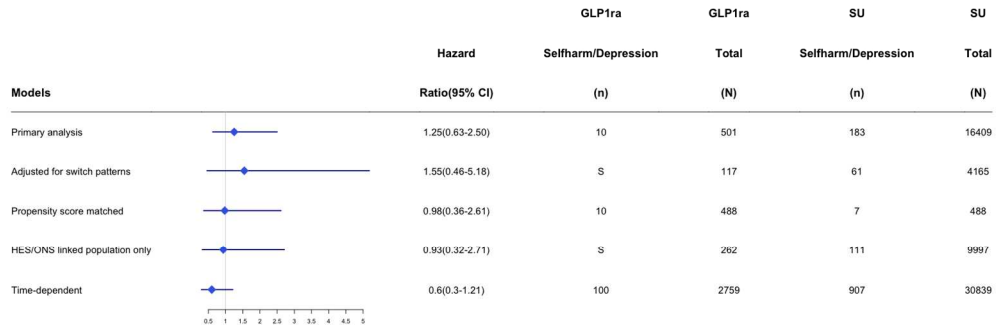

Hazard Ratios and Number of Events within GLP-1 Receptor Agonist (GLP1ra) and Sulfonylurea (SU) Users Across Sensitivity Analysis

peer review only

## Supplementary Material

## Appendix A: READ and ICD-10 Codes Used to Identify Depression

| READ Code   | Description                                                                              |
|-------------|------------------------------------------------------------------------------------------|
| 3004a       | Depression                                                                               |
| E2b..00     | Depressive Disorder Nec                                                                  |
| E204.00     | Neurotic Depression Reactive Type                                                        |
| 1b17.00     | Depressed                                                                                |
| Eu32z11     | [X]Depression Nos                                                                        |
| 3004am      | Mood Depressed                                                                           |
| 3004er      | Reactive Depression                                                                      |
| 1b17.11     | C/O - Feeling Depressed                                                                  |
| 3004l       | Looking Depressed                                                                        |
| E112.14     | Endogenous Depression                                                                    |
| E112.11     | Agitated Depression                                                                      |
| 2960ad      | Depression Agitated                                                                      |
| E204.11     | Postnatal Depression                                                                     |
| E135.00     | Agitated Depression                                                                      |
|             |                                                                                          |
| ICD-10 Code | Definition                                                                               |
| F20.4       | post-schizophrenic depression                                                            |
| F31.3       | Bipolar affective disorder, current episode mild or moderate depression                  |
| F31.4       | Bipolar affective disorder, current episode severe depression without psychotic symptoms |
| F31.5       | Bipolar affective disorder, current episode severe depression with psychotic symptoms    |
| F31.6       | Bipolar affective disorder, current episode mixed                                        |
| F32.0       | Mild depressive episode                                                                  |
| F32.1       | Moderate depressive episode                                                              |
| F32.2       | Severe depressive episode without psychotic symptoms                                     |
| F32.3       | Severe depressive episode with psychotic symptoms                                        |
| F32.4       | Depressive disorder, single episode in partial remission                                 |
| F32.5       | Depressive disorder, single episode in full remission                                    |
| F32.8       | Other depressive episodes                                                                |
| F32.9       | Depressive episode, unspecified                                                          |
| F33.0       | Recurrent depressive disorder, current episode                                           |

|              |                                                                                  |
|--------------|----------------------------------------------------------------------------------|
|              | mild                                                                             |
| <b>F33.1</b> | Recurrent depressive disorder, current episode moderate                          |
| <b>F33.2</b> | Recurrent depressive disorder, current episode severe without psychotic symptoms |
| <b>F33.3</b> | Recurrent depressive disorder, current episode severe with psychotic symptoms    |
| <b>F33.8</b> | Other recurrent depressive disorders                                             |
| <b>F33.9</b> | Recurrent depressive disorder, unspecified                                       |
| <b>F34.1</b> | Dysthymia                                                                        |
| <b>F34.8</b> | Other persistent mood [affective] disorders                                      |
| <b>F34.9</b> | Persistent mood [affective] disorder, unspecified                                |
| <b>F38.0</b> | Other single mood [affective] disorders                                          |
| <b>F38.1</b> | Other recurrent mood [affective] disorders                                       |
| <b>F38.8</b> | Other specified mood [affective] disorders                                       |
| <b>F39</b>   | Unspecified mood [affective] disorder                                            |
| <b>F41.2</b> | Mixed anxiety and depressive disorder                                            |
| <b>F99</b>   | Mental disorder, not elsewhere specified                                         |

#### Appendix B: READ and ICD-10 Codes Used to Identify Self-harm

| READ Code      | Description                                                     |
|----------------|-----------------------------------------------------------------|
| <b>SL..14</b>  | Overdose of biological substance                                |
| <b>SL..15</b>  | Overdose of drug                                                |
| <b>SLHz.00</b> | Drug and medicament poisoning not otherwise specified           |
| <b>TK..00</b>  | Suicide and self-inflicted injury                               |
| <b>TK..11</b>  | Cause of overdose "deliberate                                   |
| <b>TK..12</b>  | Injury "self-inflicted                                          |
| <b>TK..13</b>  | Poisoning "self-inflicted                                       |
| <b>TK..14</b>  | Suicide and self-harm                                           |
| <b>TK..15</b>  | Attempted suicide                                               |
| <b>TK..17</b>  | Para-suicide                                                    |
| <b>TK0.00</b>  | Suicide + self-inflicted poisoning by solid/liquid substances   |
| <b>TK00.00</b> | Suicide + self-inflicted poisoning by analgesic/antipyretic     |
| <b>TK01.00</b> | Suicide + self-inflicted poisoning by barbiturates              |
| <b>TK01000</b> | Suicide and self-inflicted injury by amylobarbitone             |
| <b>TK01100</b> | Suicide and self-inflicted injury by barbitone                  |
| <b>TK01400</b> | Suicide and self-inflicted injury by phenobarbitone             |
| <b>TK02.00</b> | Suicide + self-inflicted poisoning by other sedatives/hypnotics |
| <b>TK03.00</b> | Suicide + self-inflicted poisoning tranquilizer/psychotropic    |
| <b>TK04.00</b> | Suicide + self-inflicted poisoning by other drugs/medicines     |

|    |                |                                                                                      |
|----|----------------|--------------------------------------------------------------------------------------|
| 1  | <b>TK05.00</b> | Suicide + self-inflicted poisoning by drug or medicine not otherwise specified       |
| 2  | <b>TK06.00</b> | Suicide + self-inflicted poisoning by agricultural chemical                          |
| 3  | <b>TK07.00</b> | Suicide + self-inflicted poisoning by corrosive/caustic substance                    |
| 4  | <b>TK0z.00</b> | Suicide + self-inflicted poisoning by solid/liquid substance not otherwise specified |
| 5  |                |                                                                                      |
| 6  |                |                                                                                      |
| 7  | <b>TK1.00</b>  | Suicide + self-inflicted poisoning by gases in domestic use                          |
| 8  | <b>TK10.00</b> | Suicide + self-inflicted poisoning by gas via pipeline                               |
| 9  |                |                                                                                      |
| 10 | <b>TK11.00</b> | Suicide + self-inflicted poisoning by liquified petrol gas                           |
| 11 | <b>TK1y.00</b> | Suicide and self-inflicted poisoning by other utility gas                            |
| 12 | <b>TK1z.00</b> | Suicide + self-inflicted poisoning by domestic gases not otherwise specified         |
| 13 |                |                                                                                      |
| 14 | <b>TK2.00</b>  | Suicide + self-inflicted poisoning by other gases and vapours                        |
| 15 | <b>TK20.00</b> | Suicide + self-inflicted poisoning by motor vehicle exhaust gas                      |
| 16 | <b>TK21.00</b> | Suicide and self-inflicted poisoning by other carbon monoxide                        |
| 17 |                |                                                                                      |
| 18 | <b>TK2z.00</b> | Suicide + self-inflicted poisoning by gases and vapours not otherwise specified      |
| 19 | <b>TK3.00</b>  | Suicide + self-inflicted injury by hang/strangulate/suffocate                        |
| 20 |                |                                                                                      |
| 21 | <b>TK30.00</b> | Suicide and self-inflicted injury by hanging                                         |
| 22 | <b>TK31.00</b> | Suicide + self-inflicted injury by suffocation by plastic bag                        |
| 23 | <b>TK3y.00</b> | Suicide + self-inflicted injury by other means than hang/strangle/suffocate          |
| 24 | <b>TK3z.00</b> | Suicide + self-inflicted injury by hang/strangle/suffocate not otherwise specified   |
| 25 |                |                                                                                      |
| 26 |                |                                                                                      |
| 27 | <b>TK4.00</b>  | Suicide and self-inflicted injury by drowning                                        |
| 28 |                |                                                                                      |
| 29 | <b>TK5.00</b>  | Suicide and self-inflicted injury by firearms and explosives                         |
| 30 | <b>TK51.00</b> | Suicide and self-inflicted injury by shotgun                                         |
| 31 | <b>TK52.00</b> | Suicide and self-inflicted injury by hunting rifle                                   |
| 32 | <b>TK54.00</b> | Suicide and self-inflicted injury by other firearm                                   |
| 33 | <b>TK5z.00</b> | Suicide and self-inflicted injury by firearms/explosives not otherwise specified     |
| 34 |                |                                                                                      |
| 35 | <b>TK6.00</b>  | Suicide and self-inflicted injury by cutting and stabbing                            |
| 36 |                |                                                                                      |
| 37 | <b>TK60.00</b> | Suicide and self-inflicted injury by cutting                                         |
| 38 | <b>TK60100</b> | Self-inflicted lacerations to wrist                                                  |
| 39 | <b>TK60111</b> | Slashed wrists self-inflicted                                                        |
| 40 |                |                                                                                      |
| 41 | <b>TK61.00</b> | Suicide and self-inflicted injury by stabbing                                        |
| 42 | <b>TK6z.00</b> | Suicide and self-inflicted injury by cutting and stabbing not otherwise specified    |
| 43 |                |                                                                                      |
| 44 | <b>TK7.00</b>  | Suicide and self-inflicted injury by jumping from high place                         |
| 45 | <b>TK70.00</b> | Suicide + self-inflicted injury " jump from residential premises                     |
| 46 | <b>TK71.00</b> | Suicide + self-inflicted injury " jump from other manmade structure                  |
| 47 | <b>TK72.00</b> | Suicide + self-inflicted injury " jump from natural sites                            |
| 48 | <b>TK7z.00</b> | Suicide + self-inflicted injury " jump from high place not otherwise specified       |
| 49 |                |                                                                                      |
| 50 | <b>TKx.00</b>  | Suicide and self-inflicted injury by other means                                     |
| 51 | <b>TKx0.00</b> | Suicide + self-inflicted injury " jump/lie before moving object                      |
| 52 | <b>TKx0000</b> | Suicide + self-inflicted injury " jumping before moving object                       |
| 53 | <b>TKx1.00</b> | Suicide and self-inflicted injury by burns or fire                                   |
| 54 | <b>TKx2.00</b> | Suicide and self-inflicted injury by scald                                           |
| 55 | <b>TKx3.00</b> | Suicide and self-inflicted injury by extremes of cold                                |
| 56 |                |                                                                                      |
| 57 |                |                                                                                      |
| 58 |                |                                                                                      |
| 59 |                |                                                                                      |

|    |                |                                                                               |
|----|----------------|-------------------------------------------------------------------------------|
| 1  | <b>TKx4.00</b> | Suicide and self-inflicted injury by electrocution                            |
| 2  | <b>TKx5.00</b> | Suicide and self-inflicted injury by crashing motor vehicle                   |
| 3  | <b>TKx6.00</b> | Suicide and self-inflicted injury by crashing of aircraft                     |
| 4  | <b>TKx7.00</b> | Suicide and self-inflicted injury caustic substance                           |
| 5  | <b>TKxy.00</b> | Suicide and self-inflicted injury by other specified means                    |
| 6  | <b>TKxz.00</b> | Suicide and self-inflicted injury by other means not otherwise specified      |
| 7  | <b>TKy.00</b>  | Late effects of self-inflicted injury                                         |
| 8  | <b>TKz.00</b>  | Suicide and self-inflicted injury not otherwise specified                     |
| 9  | <b>U2..00</b>  | [X]Intentional self-harm                                                      |
| 10 | <b>U2..11</b>  | [X]Self-inflicted injury                                                      |
| 11 | <b>U2..12</b>  | [X]Injury " self-inflicted                                                    |
| 12 | <b>U2..13</b>  | [X]Suicide                                                                    |
| 13 | <b>U2..14</b>  | [X]Attempted suicide                                                          |
| 14 | <b>U2..15</b>  | [X]Para-suicide                                                               |
| 15 | <b>U20.00</b>  | [X]Intentional self-poisoning/exposure to noxious substances                  |
| 16 | <b>U20.11</b>  | [X]Deliberate drug overdose/other poisoning                                   |
| 17 | <b>U200.00</b> | [X]Intentional self-poisoning/exposure to non-opioid analgesic                |
| 18 | <b>U200.11</b> | [X]Overdose " paracetamol                                                     |
| 19 | <b>U200.12</b> | [X]Overdose " ibuprofen                                                       |
| 20 | <b>U200.13</b> | [X]Overdose " aspirin                                                         |
| 21 | <b>U200000</b> | [X]Intentional self-poisoning/exposure to non-opioid analgesic at home        |
| 22 | <b>U200100</b> | [X]Intentional self-poisoning non-opioid analgesic at residential institution |
| 23 | <b>U200400</b> | [X]Intentional self-poisoning non-opioid analgesic in street/highway          |
| 24 | <b>U200500</b> | [X]Intentional self-poisoning non-opioid analgesic trade/service area         |
| 25 | <b>U200y00</b> | [X]Intentional self-poisoning non-opioid analgesic other specified place      |
| 26 | <b>U200z00</b> | [X]Intentional self-poisoning non-opioid analgesic unspecified place          |
| 27 | <b>U201.00</b> | [X]Intentional self-poisoning/exposure to antiepileptic                       |
| 28 | <b>U201000</b> | [X]Intentional self-poisoning/exposure to antiepileptic at home               |
| 29 | <b>U201z00</b> | [X]Intentional self-poisoning antiepileptic unspecified place                 |
| 30 | <b>U202.00</b> | [X]Intentional self-poisoning/exposure to sedative hypnotic                   |
| 31 | <b>U202.11</b> | [X]Overdose " sleeping tablets                                                |
| 32 | <b>U202.12</b> | [X]Overdose " diazepam                                                        |
| 33 | <b>U202.13</b> | [X]Overdose " temazepam                                                       |
| 34 | <b>U202.15</b> | [X]Overdose " nitrazepam                                                      |
| 35 | <b>U202.16</b> | [X]Overdose " benzodiazepine                                                  |
| 36 | <b>U202.17</b> | [X]Overdose " barbiturate                                                     |
| 37 | <b>U202.18</b> | [X]Overdose " amobarbital                                                     |
| 38 | <b>U202000</b> | [X]Intentional self-poisoning /exposure to sedative hypnotic at home          |
| 39 | <b>U202400</b> | [X]Intentional self-poisoning sedative hypnotic in street/highway             |
| 40 | <b>U202y00</b> | [X]Intentional self-poisoning sedative hypnotic other specified place         |
| 41 | <b>U202z00</b> | [X]Intentional self-poisoning sedative hypnotic unspecified place             |
| 42 | <b>U204.00</b> | [X]Intentional self-poisoning/exposure to psychotropic drug                   |
| 43 | <b>U204.11</b> | [X]Overdose " antidepressant                                                  |

|    |                |                                                                                                      |
|----|----------------|------------------------------------------------------------------------------------------------------|
| 1  | <b>U204.12</b> | [X]Overdose " amitriptyline                                                                          |
| 2  | <b>U204.13</b> | [X]Overdose " SSRI                                                                                   |
| 3  | <b>U204000</b> | [X]Intentional self-poisoning /exposure to psychotropic drug at home                                 |
| 4  | <b>U204100</b> | [X]Intentional self-poisoning psychotropic drug at residential institution                           |
| 5  | <b>U204y00</b> | [X]Intentional self-poisoning psychotropic drug other specified place                                |
| 6  | <b>U204z00</b> | [X]Intentional self-poisoning psychotropic drug unspecified place                                    |
| 7  | <b>U205000</b> | [X]Intentional self-poisoning/exposure to narcotic drug at home                                      |
| 8  | <b>U205y00</b> | [X]Intentional self-poisoning narcotic drug other specified place                                    |
| 9  | <b>U205z00</b> | [X]Intentional self-poisoning narcotic drug unspecified place                                        |
| 10 | <b>U206.00</b> | [X]Intentional self-poisoning/exposure to hallucinogen                                               |
| 11 | <b>U206400</b> | [X]Intentional self-poisoning hallucinogen in street/highway                                         |
| 12 | <b>U207.00</b> | [X]Intentional self-poisoning/exposure to other autonomic drug                                       |
| 13 | <b>U207000</b> | [X]Intentional self-poisoning/exposure to other autonomic drug at home                               |
| 14 | <b>U207z00</b> | [X]Intentional self-poisoning other autonomic drug unspecified place                                 |
| 15 | <b>U208.00</b> | [X]Intentional self-poisoning/exposure to other/unspecified drug/ medicament                         |
| 16 | <b>U208400</b> | [X]Intentional self-poisoning other/unspecified drug/medication in street/highway                    |
| 17 | <b>U208y00</b> | [X]Intentional self-poisoning other/unspecified drug/medication other specified place                |
| 18 | <b>U208z00</b> | [X]Intentional self-poisoning other/unspecified drug/medication unspecified place                    |
| 19 | <b>U20A.00</b> | [X]Intentional self-poisoning organic solvent                                                        |
| 20 | <b>U20A.11</b> | [X]Self-poisoning from glue solvent                                                                  |
| 21 | <b>U20A000</b> | "[X]Intentional self-poisoning organic solvent                                                       |
| 22 | <b>U20A400</b> | "[X]Intentional self-poisoning organic solvent                                                       |
| 23 | <b>U20Az00</b> | "[X]Intentional self-poisoning organic solvent                                                       |
| 24 | <b>U20B.00</b> | [X]Intentional self-poisoning/exposure to other gas/vapour U20B.11 [X]Self carbon monoxide poisoning |
| 25 | <b>U20B000</b> | [X]Intentional self-poisoning/exposure to other gas/vapour at home                                   |
| 26 | <b>U20B200</b> | [X]Intentional self-poisoning other gas/vapour school/public admin area                              |
| 27 | <b>U20By00</b> | [X]Intentional self-poisoning other gas/vapour other specified place                                 |
| 28 | <b>U20Bz00</b> | [X]Intentional self-poisoning other gas/vapour unspecified place                                     |
| 29 | <b>U20C.00</b> | [X]Intentional self-poisoning/exposure to pesticide                                                  |
| 30 | <b>U20C.11</b> | [X]Self-poisoning with weedkiller                                                                    |
| 31 | <b>U20C.12</b> | [X]Self-poisoning with paraquat                                                                      |
| 32 | <b>U20C000</b> | [X]Intentional self-poisoning/exposure to pesticide at home                                          |
| 33 | <b>U20Cy00</b> | [X]Intentional self-poisoning pesticide other specified place                                        |
| 34 | <b>U20y.00</b> | [X]Intentional self-poisoning/exposure to unspecified chemical                                       |
| 35 | <b>U20y000</b> | [X]Intentional self-poisoning/exposure to unspecified chemical at home                               |
| 36 | <b>U20y200</b> | [X]Intentional self-poisoning unspecified chemical school/public admin area                          |
| 37 | <b>U20yz00</b> | [X]Intentional self-poisoning unspecified chemical unspecified place                                 |
| 38 | <b>U21.00</b>  | [X]Intentional self-harm by hanging/strangulation/suffocation                                        |
| 39 | <b>U210.00</b> | [X]Intentional self-harm by hanging/strangulation/suffocation at home                                |



|                |                                                                                                          |
|----------------|----------------------------------------------------------------------------------------------------------|
| <b>U211.00</b> | [X]Intentional self-harm by hanging/strangulation/suffocation occurrence at residential institution      |
| <b>U21y.00</b> | [X]Intentional self-harm by hanging/strangulation/suffocation other specified place                      |
| <b>U21z.00</b> | [X]Intentional self-harm by hanging/strangulation/suffocation unspecified place                          |
| <b>U22.00</b>  | [X]Intentional self-harm by drowning and submersion                                                      |
| <b>U221.0</b>  | [X]Intentional self-harm by drowning/submersion occurrence at residential institution                    |
| <b>U22y.00</b> | [X]Intentional self-harm by drowning/submersion occurrence at other specified place                      |
| <b>U22z.00</b> | [X]Intentional self-harm by drowning/submersion occurrence at unspecified place                          |
| <b>U24.00</b>  | [X]Intentional self-harm by rifle shotgun/larger firearm discharge                                       |
| <b>U241.00</b> | [X]Intentional self-harm by rifle shotgun/larger firearm discharge occurrence at residential institution |
| <b>U242.00</b> | [X]Intentional self-harm by rifle shotgun/larger firearm discharge in school/public admin area           |
| <b>U25.00</b>  | [X]Intentional self-harm by other/unspecified firearm discharge                                          |
| <b>U250.00</b> | [X]Intentional self-harm other/unspecif firearm discharge occurrence at home                             |
| <b>U26.00</b>  | [X]Intentional self-harm by explosive material                                                           |
| <b>U27.00</b>  | [X]Intentional self-harm by smoke                                                                        |
| <b>U270.00</b> | [X]Intentional self-harm by smoke fire/flames occurrence at home                                         |
| <b>U274.00</b> | [X]Intentional self-harm by smoke fire/flame occurrence in street/highway                                |
| <b>U27z.00</b> | [X]Intentional self-harm by smoke fire/flames occurrence in unspecified place                            |
| <b>U28.00</b>  | [X]Intentional self-harm by steam hot vapours/hot objects                                                |
| <b>U280.00</b> | [X]Intentional self-harm by steam hot vapours/hot objects occurrence at home                             |
| <b>U28z.00</b> | [X]Intentional self-harm by steam hot vapours/hot objects occurrence in unspecified place                |
| <b>U29.00</b>  | [X]Intentional self-harm by sharp object                                                                 |
| <b>U290.00</b> | [X]Intentional self-harm by sharp object occurrence at home                                              |
| <b>U291.00</b> | [X]Intentional self-harm by sharp object occurrence at residential institution                           |
| <b>U294.00</b> | [X]Intentional self-harm by sharp object occurrence in street/highway                                    |
| <b>U29y.00</b> | [X]Intentional self-harm by sharp object occurrence at other specified place                             |
| <b>U29z.00</b> | [X]Intentional self-harm by sharp object occurrence at unspecified place                                 |
| <b>U2A.00</b>  | [X]Intentional self-harm by blunt object                                                                 |
| <b>U2A0.00</b> | [X]Intentional self-harm by blunt object occurrence at home                                              |
| <b>U2A1.00</b> | [X]Intentional self-harm by blunt object occurrence at residential institution                           |
| <b>U2A3.00</b> | [X]Intentional self-harm by blunt object occurrence at sports/athletic area                              |
| <b>U2B.00</b>  | [X]Intentional self-harm by jumping from a high place                                                    |
| <b>U2B0.00</b> | [X]Intentional self-harm by jumping from high place occurrence at home                                   |
| <b>U2B4.00</b> | [X]Intentional self-harm by jumping from high place occurring in street/highway                          |
| <b>U2B6.00</b> | [X]Intentional self-harm by jumping from high place industrial/construction area                         |

|                |                                                                                                        |
|----------------|--------------------------------------------------------------------------------------------------------|
| <b>U2By.00</b> | [X]Intentional self-harm by jumping from high place occurrence other specified place                   |
| <b>U2Bz.0</b>  | 0                                                                                                      |
| <b>U2C.00</b>  | [X]Intentional self-harm by jumping/lying before moving object                                         |
| <b>U2C1.00</b> | [X]Intentional self-harm by jumping/lying before moving object occurrence at residential institution   |
| <b>U2C4.00</b> | [X]Intentional self-harm by jumping/lying before moving object occurrence in street/highway            |
| <b>U2Cy.00</b> | [X]Intentional self-harm by jumping/lying before moving object occurrence other specified place        |
| <b>U2D.00</b>  | [X]Intentional self-harm by crashing of motor vehicle                                                  |
| <b>U2D0.00</b> | [X]Intentional self-harm by crashing of motor vehicle occurrence at home                               |
| <b>U2D4.00</b> | [X]Intentional self-harm by crashing of motor vehicle occurrence in street/highway                     |
| <b>U2D6.00</b> | [X]Intentional self-harm by crashing of motor vehicle occurrence industrial/construction area          |
| <b>U2E.00</b>  | <b>[X]Self-mutilation</b>                                                                              |
| <b>U2y.00</b>  | [X]Intentional self-harm by other specified means                                                      |
| <b>U2y0.00</b> | [X]Intentional self-harm by other specified means occurrence at home                                   |
| <b>U2y1.00</b> | [X]Intentional self-harm by other specified means occurrence at residential institution                |
| <b>U2yz.00</b> | [X]Intentional self-harm by other specif means occurrence at unspecified place                         |
| <b>U2z.00</b>  | [X]Intentional self-harm by unspecified means                                                          |
| <b>U2z0.00</b> | [X]Intentional self-harm by unspecified means occurrence at home                                       |
| <b>U2z2.00</b> | [X]Intentional self-harm by unspecified means occurrence school/institution/public administrative area |
| <b>U2zy.00</b> | [X]Intentional self-harm by unspecified means occurrence other specified place                         |
| <b>U2zz.00</b> | [X]Intentional self-harm by unspecified means occurrence at unspecified place                          |
| <b>U30.11</b>  | [X]Deliberate drug poisoning                                                                           |
| <b>U41.00</b>  | [X]Hanging strangulation + suffocation undetermined intent                                             |
| <b>U44.00</b>  | [X]Rifle shotgun + larger firearm discharge undetermined intent                                        |
| <b>U45.00</b>  | [X]Other + unspecified firearm discharge undetermined intent                                           |
| <b>U4B.00</b>  | [X]Falling jumping/pushed from high place undetermine intent                                           |
| <b>U4Bz.00</b> | [X]Fall jump/push from high place undetermine intent occurring at unspecified place                    |
| <b>U72.00</b>  | [X]Sequelae of intentional self-harm assault + event of undetermined intent                            |
| <b>U720.00</b> | [X]Sequelae of intentional self-harm                                                                   |
| <b>ZRLfc12</b> | Health of the Nation Outcome Scales item 2 “ nonaccidental self-injury                                 |
| <b>ZX..00</b>  | Self-harm                                                                                              |
| <b>ZX..11</b>  | Self-damage                                                                                            |
| <b>ZX1.00</b>  | Self-injurious behaviour                                                                               |
| <b>ZX1.12</b>  | SIB “ self-injurious behaviour                                                                         |
| <b>ZX1.13</b>  | Deliberate self-harm                                                                                   |
| <b>ZX11.00</b> | Biting self                                                                                            |

|    |                   |                                                                                                                                                   |
|----|-------------------|---------------------------------------------------------------------------------------------------------------------------------------------------|
| 1  | <b>ZX11.11</b>    | Bites self                                                                                                                                        |
| 2  | <b>ZX12.00</b>    | Burning self                                                                                                                                      |
| 3  | <b>ZX13.00</b>    | Cutting self                                                                                                                                      |
| 4  | <b>ZX13.11</b>    | Cuts self                                                                                                                                         |
| 5  | <b>ZX15.00</b>    | Drowning self                                                                                                                                     |
| 6  | <b>ZX18.00</b>    | Hanging self                                                                                                                                      |
| 7  | <b>ZX19.00</b>    | Hitting self                                                                                                                                      |
| 8  | <b>ZX19100</b>    | Punching self                                                                                                                                     |
| 9  | <b>ZX19200</b>    | Slapping self                                                                                                                                     |
| 10 | <b>ZX1B.00</b>    | Jumping from height                                                                                                                               |
| 11 | <b>ZX1B100</b>    | Jumping from building                                                                                                                             |
| 12 | <b>ZX1B200</b>    | Jumping from bridge                                                                                                                               |
| 13 | <b>ZX1B300</b>    | Jumping from cliff                                                                                                                                |
| 14 | <b>ZX1C.00</b>    | Nipping self                                                                                                                                      |
| 15 | <b>ZX1E.00</b>    | Pinching self                                                                                                                                     |
| 16 | <b>ZX1G.00</b>    | Scratches self                                                                                                                                    |
| 17 | <b>ZX1H.00</b>    | Self-asphyxiation                                                                                                                                 |
| 18 | <b>ZX1H100</b>    | Self-strangulation                                                                                                                                |
| 19 | <b>ZX1H200</b>    | Self-suffocation                                                                                                                                  |
| 20 | <b>ZX1I.00</b>    | Self-scalding                                                                                                                                     |
| 21 | <b>ZX1J.00</b>    | Self-electrocution                                                                                                                                |
| 22 | <b>ZX1K.00</b>    | Self-incineration                                                                                                                                 |
| 23 | <b>ZX1K.11</b>    | Setting fire to self                                                                                                                              |
| 24 | <b>ZX1K.12</b>    | Setting self alight                                                                                                                               |
| 25 | <b>ZX1L.00</b>    | Self-mutilation                                                                                                                                   |
| 26 | <b>ZX1L100</b>    | Self-mutilation of hands                                                                                                                          |
| 27 | <b>ZX1L200</b>    | Self-mutilation of genitalia                                                                                                                      |
| 28 | <b>ZX1L300</b>    | Self-mutilation of penis                                                                                                                          |
| 29 | <b>ZX1L600</b>    | Self-mutilation of ears                                                                                                                           |
| 30 | <b>ZX1LD00</b>    | [X]Self mutilation                                                                                                                                |
| 31 | <b>ZX1M.00</b>    | Shooting self                                                                                                                                     |
| 32 | <b>ZX1N.00</b>    | Stabbing self                                                                                                                                     |
| 33 | <b>ZX1Q.00</b>    | Throwing self in front of train                                                                                                                   |
| 34 | <b>ZX1Q.11</b>    | Jumping under train                                                                                                                               |
| 35 | <b>ZX1R.00</b>    | Throwing self in front of vehicle                                                                                                                 |
| 36 | <b>ZX1S.00</b>    | Throwing self onto floor                                                                                                                          |
| 37 |                   |                                                                                                                                                   |
| 38 |                   |                                                                                                                                                   |
| 39 |                   |                                                                                                                                                   |
| 40 |                   |                                                                                                                                                   |
| 41 |                   |                                                                                                                                                   |
| 42 |                   |                                                                                                                                                   |
| 43 |                   |                                                                                                                                                   |
| 44 |                   |                                                                                                                                                   |
| 45 |                   |                                                                                                                                                   |
| 46 |                   |                                                                                                                                                   |
| 47 |                   |                                                                                                                                                   |
| 48 |                   |                                                                                                                                                   |
| 49 |                   |                                                                                                                                                   |
| 50 |                   |                                                                                                                                                   |
| 51 | <b>ICD-10code</b> | <b>Description</b>                                                                                                                                |
| 52 | <b>X60</b>        | Intentional self-poisoning by and exposure to nonopioid analgesics, antipyretics and antirheumatics                                               |
| 53 | <b>X61</b>        | Intentional self-poisoning by and exposure to antiepileptic, sedative-hypnotic, antiparkinsonism and psychotropic drugs, not elsewhere classified |
| 54 | <b>X62</b>        | Intentional self-poisoning by and exposure to narcotics and psychodysleptics                                                                      |

|            |                                                                                                                                                       |
|------------|-------------------------------------------------------------------------------------------------------------------------------------------------------|
|            | [hallucinogens], not elsewhere classified                                                                                                             |
| <b>X63</b> | Intentional self-poisoning by and exposure to other drugs acting on the autonomic nervous system                                                      |
| <b>X64</b> | Intentional self-poisoning by and exposure to other and unspecified drugs, medicaments and biological substances                                      |
| <b>X65</b> | Intentional self-poisoning by and exposure to alcohol                                                                                                 |
| <b>X66</b> | Intentional self-poisoning by and exposure to organic solvents and halogenated hydrocarbons and their vapours                                         |
| <b>X67</b> | Intentional self-poisoning by and exposure to other gases and vapours                                                                                 |
| <b>X68</b> | Intentional self-poisoning by and exposure to pesticides                                                                                              |
| <b>X69</b> | Intentional self-poisoning by and exposure to other and unspecified chemicals and noxious substances                                                  |
| <b>X70</b> | Intentional self-harm by hanging, strangulation and suffocation                                                                                       |
| <b>X71</b> | Intentional self-harm by drowning and submersion                                                                                                      |
| <b>X72</b> | Intentional self-harm by handgun discharge                                                                                                            |
| <b>X73</b> | Intentional self-harm by rifle, shotgun and larger firearm discharge                                                                                  |
| <b>X74</b> | Intentional self-harm by other and unspecified firearm discharge                                                                                      |
| <b>X75</b> | Intentional self-harm by explosive material                                                                                                           |
| <b>X76</b> | Intentional self-harm by smoke, fire and flames                                                                                                       |
| <b>X77</b> | Intentional self-harm by steam, hot vapours and hot objects                                                                                           |
| <b>X78</b> | Intentional self-harm by sharp object                                                                                                                 |
| <b>X79</b> | Intentional self-harm by blunt object                                                                                                                 |
| <b>X80</b> | Intentional self-harm by jumping from a high place                                                                                                    |
| <b>X81</b> | Intentional self-harm by jumping or lying before moving object                                                                                        |
| <b>X82</b> | Intentional self-harm by crashing of motor vehicle                                                                                                    |
| <b>X83</b> | Intentional self-harm by other specified means                                                                                                        |
| <b>X84</b> | Intentional self-harm by unspecified means                                                                                                            |
| <b>Y10</b> | Poisoning by and exposure to nonopioid analgesics, antipyretics and antirheumatics, undetermined intent                                               |
| <b>Y11</b> | Poisoning by and exposure to antiepileptic, sedative-hypnotic, antiparkinsonism and psychotropic drugs, not elsewhere classified, undetermined intent |
| <b>Y12</b> | Poisoning by and exposure to narcotics and psychodysleptics [hallucinogens], not elsewhere classified, undetermined intent                            |
| <b>Y13</b> | Poisoning by and exposure to other drugs acting on the autonomic nervous system, undetermined intent                                                  |
| <b>Y14</b> | Poisoning by and exposure to other and unspecified drugs, medicaments and biological substances, undetermined intent                                  |
| <b>Y15</b> | Poisoning by and exposure to alcohol, undetermined intent                                                                                             |
| <b>Y16</b> | Poisoning by and exposure to organic solvents and halogenated hydrocarbons and their vapours, undetermined intent                                     |
| <b>Y17</b> | Poisoning by and exposure to other gases and vapours, undetermined intent                                                                             |
| <b>Y18</b> | Poisoning by and exposure to pesticides, undetermined intent                                                                                          |
| <b>Y19</b> | Poisoning by and exposure to other and unspecified chemicals and noxious substances, undetermined intent                                              |
| <b>Y20</b> | Hanging, strangulation and suffocation, undetermined intent                                                                                           |

|    |            |                                                                             |
|----|------------|-----------------------------------------------------------------------------|
| 1  | <b>Y21</b> | Drowning and submersion, undetermined intent                                |
| 2  | <b>Y22</b> | Handgun discharge, undetermined intent                                      |
| 3  | <b>Y23</b> | Rifle, shotgun and larger firearm discharge, undetermined intent            |
| 4  | <b>Y24</b> | Other and unspecified firearm discharge, undetermined intent                |
| 5  | <b>Y25</b> | Contact with explosive material, undetermined intent                        |
| 6  | <b>Y26</b> | Exposure to smoke, fire and flames, undetermined intent                     |
| 7  | <b>Y27</b> | Contact with steam, hot vapours and hot objects, undetermined intent        |
| 8  | <b>Y28</b> | Contact with sharp object, undetermined intent                              |
| 9  | <b>Y29</b> | Contact with blunt object, undetermined intent                              |
| 10 | <b>Y30</b> | Falling, jumping or pushed from a high place, undetermined intent           |
| 11 | <b>Y31</b> | Falling, lying or running before or into moving object, undetermined intent |
| 12 | <b>Y32</b> | Crashing of motor vehicle, undetermined intent                              |
| 13 | <b>Y33</b> | Other specified events, undetermined intent                                 |
| 14 | <b>Y34</b> | Unspecified event, undetermined intent                                      |

### Appendix C. Covariates Forced into the High Density Propensity Score

|    |                                                                                                                                          |
|----|------------------------------------------------------------------------------------------------------------------------------------------|
| 23 | <b>All covariates assessed in the 365 days prior to study index date</b>                                                                 |
| 24 | Age at index date                                                                                                                        |
| 25 | Alcohol Abuse [Never, Former, Current, Unknown]                                                                                          |
| 26 | BMI                                                                                                                                      |
| 27 | Duration of treated diabetes [time between first oral antidiabetic drug and study index date]                                            |
| 28 | History of:                                                                                                                              |
| 29 | Cirrhosis                                                                                                                                |
| 30 | Congestive heart failure                                                                                                                 |
| 31 | Hypertension                                                                                                                             |
| 32 | Hyperlipidemia                                                                                                                           |
| 33 | Ischemic heart disease                                                                                                                   |
| 34 | Peripheral heart disease                                                                                                                 |
| 35 | Number of hospitalizations                                                                                                               |
| 36 | Most recent HbA1c value to index date                                                                                                    |
| 37 | Number of distinct prescription drugs                                                                                                    |
| 38 | Prior use of benzodiazepines or other hypnotics, antipsychotics, levothyroxine or triiodothyronine, anticonvulsants, or mood stabilizers |
| 39 | Sex                                                                                                                                      |
| 40 | Smoking status [Never, Former, Current, Unknown]                                                                                         |
| 41 | Socioeconomic status [quintiles of Index of Multiple Deprivation]                                                                        |
| 42 | Use of other antidiabetic agents                                                                                                         |
| 43 | Year of cohort entry                                                                                                                     |

**Appendix D. Measures of frequency and association for depression among DPP-4 inhibitor and GLP-1 receptor agonist cohorts**

|                                             | DPP4i               | SU                  | GLP1ra              | SU                  |
|---------------------------------------------|---------------------|---------------------|---------------------|---------------------|
| Number of patients                          | 6207                | 22218               | 502                 | 16728               |
| Person-years follow-up                      | 5591                | 18683               | 549                 | 13628               |
| Number of events                            | 45                  | 215                 | 10                  | 182                 |
| Incidence per 1000 person-years<br>(95% CI) | 8.0<br>(6.0-10.8)   | 11.5<br>(10.1-13.2) | 18.2<br>(10-33.5)   | 13.4<br>(11.6-15.4) |
| Crude Hazard Ratio<br>(95% CI)              | 0.70<br>(0.50-0.96) | -ref-               | 1.39<br>(0.74-2.63) | -ref-               |
| Adjusted Hazard Ratio<br>(95% CI)           | 0.81<br>(0.57-1.14) | -ref-               | 1.22<br>(0.61-2.42) | -ref-               |

**S = suppressed due to low number of events**

**Appendix E. Measures of frequency and association for self-harm among DPP-4 inhibitor and GLP-1 receptor agonist cohorts**

|                                             | DPP4i               | SU               | GLP1ra | SU    |
|---------------------------------------------|---------------------|------------------|--------|-------|
| Number of patients                          | 6211                | 22180            | 502    | 16632 |
| Person-years follow-up                      | 5632                | 18839            | 563    | 13696 |
| Number of events                            | S                   | 5                | S      | S     |
| Incidence per 1000 person-years<br>(95% CI) | S                   | 0.3<br>(0.1-0.6) | S      | S     |
| Crude Hazard Ratio<br>(95% CI)              | 0.66<br>(0.08-5.69) | -ref-            | S      | -ref- |
| Adjusted Hazard Ratio<br>(95% CI)           | 0.77<br>(0.07-8.21) | -ref-            | S      | -ref- |

**S = suppressed due to low number of events**

**Appendix F. Measures of frequency and association for depression or self-harm among DPP-4 inhibitor and GLP-1 receptor agonist cohorts when patients are matched 1:1 by propensity score.**

|                                             | DPP4i               | SU                 | GLP1ra              | SU                 |
|---------------------------------------------|---------------------|--------------------|---------------------|--------------------|
| Number of patients                          | 6008                | 6008               | 488                 | 488                |
| Person-years follow-up                      | 548                 | 4488               | 529                 | 349                |
| Number of events                            | 44                  | 49                 | 10                  | 7                  |
| Incidence per 1000 person-years<br>(95% CI) | 8.0<br>(6-10.8)     | 10.9<br>(8.3-14.4) | 18.9<br>(10.4-34.8) | 20.1<br>(9.9-41.3) |
| Crude Hazard Ratio<br>(95% CI)              | 0.75<br>(0.50-1.13) | -ref-              | 0.99<br>(0.37-2.61) | -ref-              |
| Adjusted Hazard Ratio<br>(95% CI)           | 0.77<br>(0.51-1.16) | -ref-              | 0.98<br>(0.36-2.61) | -ref-              |

**Appendix G. Measures of frequency and association for depression or self-harm among DPP-4 inhibitor and GLP-1 receptor agonist cohorts when patients are adjusted for pattern of glucose-lowering therapy.**

|                                            | DPP4i               | SU                 | GLP1RA              | SU                  |
|--------------------------------------------|---------------------|--------------------|---------------------|---------------------|
| Number of patients                         | 4416                | 15943              | 117                 | 4165                |
| Person-years follow-up                     | 3743                | 12614              | 90                  | 3327                |
| Number of events                           | 36                  | 140                | S                   | 61                  |
| Incidence per 1000 person-years<br>(95%CI) | 9.6<br>(7-13.3)     | 11.1<br>(9.4-13.1) | 33.4<br>(12.1-97.5) | 18.3<br>(14.3-23.6) |
| Crude Hazard Ratio<br>(95% CI)             | 0.86<br>(0.60-1.24) | -ref-              | 1.82<br>(0.57-5.80) | -ref-               |
| Adjusted Hazard Ratio<br>(95% CI)          | 1.00<br>(0.66-1.49) | -ref-              | 1.55<br>(0.46-5.18) | -ref-               |

**S = suppressed due to low number of events**

**Appendix H. Measures of frequency and association for depression or self-harm among DPP-4 inhibitor and GLP-1 receptor agonist cohorts when patients are restricted to only those with HES/ONS linked data.**

|                                            | DPP4i               | SU                  | GLP1ra              | SU                |
|--------------------------------------------|---------------------|---------------------|---------------------|-------------------|
| Number of patients                         | 3348                | 13243               | 262                 | 9997              |
| Person-years follow-up                     | 2841                | 10762               | 290                 | 7904              |
| Number of events                           | 27                  | 132                 | S                   | 111               |
| Incidence per 1000 person-years<br>(95%CI) | 9.5<br>(6.5-13.8)   | 12.3<br>(10.3-14.5) | 13.8<br>(5.6-35.3)  | 14<br>(11.7-16.9) |
| Crude Hazard Ratio<br>(95% CI)             | 0.78<br>(0.51-1.17) | -ref-               | 1.00<br>(0.37-2.72) | -ref-             |
| Adjusted Hazard Ratio<br>(95% CI)          | 0.99<br>(0.63-1.55) | -ref-               | 0.93<br>(0.32-2.71) | -ref-             |

**Appendix I. Measures of frequency and association for depression or self-harm among DPP-4 inhibitor and GLP-1 receptor agonist cohorts when patients are restricted to second-line therapy after metformin monotherapy.**

|                                            | DPP4i               | SU                  | GLP1ra           | SU                |
|--------------------------------------------|---------------------|---------------------|------------------|-------------------|
| Number of patients                         | 1255                | 4612                | 65               | 2112              |
| Person-years follow-up                     | 1191                | 3601                | 47               | 1680              |
| Number of events                           | 11                  | 48                  | S                | 29                |
| Incidence per 1000 person-years<br>(95%CI) | 9.2<br>(5.2-16.5)   | 13.3<br>(10.1-17.7) | 43(13.3-155.3)   | 17.3<br>(12-24.8) |
| Crude Hazard Ratio<br>(95% CI)             | 0.71<br>(0.37-1.38) | -ref-               | 2.49(0.59-10.45) | -ref-             |
| Adjusted Hazard Ratio<br>(95% CI)          | 0.67<br>(0.34-1.34) | -ref-               | 1.92(0.44-8.31)  | -ref-             |

**S = suppressed due to low number of events**



**Appendix J. Measures of frequency and association for depression or self-harm among DPP-4 inhibitor and GLP-1 receptor agonist cohorts when BMI categories (in addition to hdps deciles) were added to the Cox proportional regression model.**

|                                            | DPP4i               | SU                  | GLP1ra              | SU                  |
|--------------------------------------------|---------------------|---------------------|---------------------|---------------------|
| Number of patients                         | 6206                | 22128               | 501                 | 16409               |
| Person-years follow-up                     | 5589                | 18596               | 549                 | 13418               |
| Number of events                           | 46                  | 218                 | 10                  | 183                 |
| Incidence per 1000 person-years<br>(95%CI) | 8.2<br>(6.2-11)     | 11.7<br>(10.3-13.4) | 18.2<br>(10-33.5)   | 13.6<br>(11.8-15.8) |
| Crude Hazard Ratio<br>(95% CI)             | 0.70<br>(0.51-0.96) | -ref-               | 1.36<br>(0.72-2.58) | -ref-               |
| Adjusted Hazard Ratio<br>(95% CI)          | 0.81<br>(0.58-1.15) | -ref-               | 1.25<br>(0.63-2.51) | -ref-               |

S = suppressed due to low number of events

**Appendix K. Time-dependent Cox regression for DPP-4 inhibitor monotherapy and combination therapies Vs. Sulfonylurea (SU) monotherapy**

| Exposure vs. SU monotherapy | Coef  | *Adjusted HR | Lower .95 | Upper .95 | Se (coef) | Pr (> z ) |
|-----------------------------|-------|--------------|-----------|-----------|-----------|-----------|
| DPP-4i monotherapy          | -0.07 | 0.93         | 0.65      | 1.32      | 0.18      | 0.69      |
| DPP-4i/SU                   | -0.53 | 0.59         | 0.34      | 1.02      | 0.28      | 0.06      |
| DPP-4i/Other                | -0.16 | 0.85         | 0.70      | 1.04      | 0.10      | 0.11      |
| DPP-4i/SU/Other             | -0.13 | 0.88         | 0.68      | 1.14      | 0.13      | 0.33      |

\*Adjusted for deciles of hdps

**Appendix L. Time-dependent Cox regression for GLP-1 receptor agonist (GLP1ra) monotherapy and combination therapies Vs. Sulfonylurea (SU) monotherapy**

| Exposure vs. SU monotherapy | Coef  | *Adjusted HR | Lower .95 | Upper .95 | Se (coef) | Pr (> z ) |
|-----------------------------|-------|--------------|-----------|-----------|-----------|-----------|
| GLP1ra monotherapy          | -0.51 | 0.60         | 0.30      | 1.21      | 0.36      | 0.15      |
| GLP1ra /SU                  | 0.45  | 1.57         | 0.78      | 3.18      | 0.36      | 0.21      |
| GLP1ra /Other               | 0.14  | 1.16         | 0.88      | 1.52      | 0.14      | 0.31      |
| GLP1ra /SU/Other            | -0.31 | 0.73         | 0.47      | 1.15      | 0.23      | 0.18      |

\*Adjusted for deciles of hdps



STROBE Statement—Checklist of items that should be included in reports of *cohort studies*

|                              | Item No | Recommendation                                                                                                                                                                                                                                                                                                                                                         |
|------------------------------|---------|------------------------------------------------------------------------------------------------------------------------------------------------------------------------------------------------------------------------------------------------------------------------------------------------------------------------------------------------------------------------|
| <b>Title and abstract</b>    | 1       | (a) Indicate the study's design with a commonly used term in the title or the abstract<br><b>Cohort in title</b><br>(b) Provide in the abstract an informative and balanced summary of what was done and what was found<br><b>Structured abstract provided</b>                                                                                                         |
| <b>Introduction</b>          |         |                                                                                                                                                                                                                                                                                                                                                                        |
| Background/rationale         | 2       | Explain the scientific background and rationale for the investigation being reported<br><b>Introduction – paragraphs 1 and 2</b>                                                                                                                                                                                                                                       |
| Objectives                   | 3       | State specific objectives, including any prespecified hypotheses<br><b>Introduction – paragraph 3</b>                                                                                                                                                                                                                                                                  |
| <b>Methods</b>               |         |                                                                                                                                                                                                                                                                                                                                                                        |
| Study design                 | 4       | Present key elements of study design early in the paper<br><b>Methods, Study Design and Data Sources section, paragraph 1</b>                                                                                                                                                                                                                                          |
| Setting                      | 5       | Describe the setting, locations, and relevant dates, including periods of recruitment, exposure, follow-up, and data collection<br><b>Methods, Study Design and Data Sources section, paragraph 1</b>                                                                                                                                                                  |
| Participants                 | 6       | (a) Give the eligibility criteria, and the sources and methods of selection of participants. Describe methods of follow-up<br><b>Methods, Study Cohort section, paragraph 1</b><br>(b) For matched studies, give matching criteria and number of exposed and unexposed                                                                                                 |
| Variables                    | 7       | Clearly define all outcomes, exposures, predictors, potential confounders, and effect modifiers. Give diagnostic criteria, if applicable<br><b>Methods, Exposure and Outcome Definitions section</b>                                                                                                                                                                   |
| Data sources/<br>measurement | 8*      | For each variable of interest, give sources of data and details of methods of assessment (measurement). Describe comparability of assessment methods if there is more than one group<br><b>Methods, Exposure and Outcome Definitions section</b><br><b>Supplemental appendix</b>                                                                                       |
| Bias                         | 9       | Describe any efforts to address potential sources of bias<br><b>Methods, Statistical Analysis section, paragraphs 2 and 3</b>                                                                                                                                                                                                                                          |
| Study size                   | 10      | Explain how the study size was arrived at<br><b>Figure 1</b>                                                                                                                                                                                                                                                                                                           |
| Quantitative variables       | 11      | Explain how quantitative variables were handled in the analyses. If applicable, describe which groupings were chosen and why<br><b>Methods, Exposure and Outcome Definitions section</b><br><b>Methods, Statistical Analysis section</b>                                                                                                                               |
| Statistical methods          | 12      | (a) Describe all statistical methods, including those used to control for confounding<br>(b) Describe any methods used to examine subgroups and interactions<br>(c) Explain how missing data were addressed<br>(d) If applicable, explain how loss to follow-up was addressed<br>(e) Describe any sensitivity analyses<br><b>Methods, Statistical Analysis section</b> |
| <b>Results</b>               |         |                                                                                                                                                                                                                                                                                                                                                                        |
| Participants                 | 13*     | (a) Report numbers of individuals at each stage of study—eg numbers potentially                                                                                                                                                                                                                                                                                        |

|                          |     |                                                                                                                                                                                                              |
|--------------------------|-----|--------------------------------------------------------------------------------------------------------------------------------------------------------------------------------------------------------------|
|                          |     | eligible, examined for eligibility, confirmed eligible, included in the study, completing follow-up, and analysed                                                                                            |
|                          |     | (b) Give reasons for non-participation at each stage                                                                                                                                                         |
|                          |     | (c) Consider use of a flow diagram                                                                                                                                                                           |
|                          |     | <b>Figure 1 is a flow diagram</b>                                                                                                                                                                            |
| Descriptive data         | 14* | (a) Give characteristics of study participants (eg demographic, clinical, social) and information on exposures and potential confounders                                                                     |
|                          |     | (b) Indicate number of participants with missing data for each variable of interest                                                                                                                          |
|                          |     | (c) Summarise follow-up time (eg, average and total amount)                                                                                                                                                  |
|                          |     | <b>Table 3</b>                                                                                                                                                                                               |
|                          |     | <b>Results section</b>                                                                                                                                                                                       |
| Outcome data             | 15* | Report numbers of outcome events or summary measures over time                                                                                                                                               |
|                          |     | <b>Table 3</b>                                                                                                                                                                                               |
|                          |     | <b>Results section</b>                                                                                                                                                                                       |
|                          |     | <b>Supplemental appendix</b>                                                                                                                                                                                 |
| Main results             | 16  | (a) Give unadjusted estimates and, if applicable, confounder-adjusted estimates and their precision (eg, 95% confidence interval). Make clear which confounders were adjusted for and why they were included |
|                          |     | (b) Report category boundaries when continuous variables were categorized                                                                                                                                    |
|                          |     | (c) If relevant, consider translating estimates of relative risk into absolute risk for a meaningful time period                                                                                             |
|                          |     | <b>Results section</b>                                                                                                                                                                                       |
|                          |     | <b>Table 3</b>                                                                                                                                                                                               |
| Other analyses           | 17  | Report other analyses done—eg analyses of subgroups and interactions, and sensitivity analyses                                                                                                               |
|                          |     | <b>Results section, paragraph 5</b>                                                                                                                                                                          |
|                          |     | <b>Figure 2</b>                                                                                                                                                                                              |
|                          |     | <b>Figure 3</b>                                                                                                                                                                                              |
|                          |     | <b>Supplemental appendix</b>                                                                                                                                                                                 |
| <b>Discussion</b>        |     |                                                                                                                                                                                                              |
| Key results              | 18  | Summarise key results with reference to study objectives                                                                                                                                                     |
|                          |     | <b>Discussion section, paragraph 1</b>                                                                                                                                                                       |
| Limitations              | 19  | Discuss limitations of the study, taking into account sources of potential bias or imprecision. Discuss both direction and magnitude of any potential bias                                                   |
|                          |     | <b>Discussion section, paragraph 5</b>                                                                                                                                                                       |
| Interpretation           | 20  | Give a cautious overall interpretation of results considering objectives, limitations, multiplicity of analyses, results from similar studies, and other relevant evidence                                   |
|                          |     | <b>Discussion section, final paragraph</b>                                                                                                                                                                   |
| Generalisability         | 21  | Discuss the generalisability (external validity) of the study results                                                                                                                                        |
| <b>Other information</b> |     |                                                                                                                                                                                                              |
| Funding                  | 22  | Give the source of funding and the role of the funders for the present study and, if applicable, for the original study on which the present article is based                                                |
|                          |     | <b>Funding support</b>                                                                                                                                                                                       |

\*Give information separately for exposed and unexposed groups.

**Note:** An Explanation and Elaboration article discusses each checklist item and gives methodological background and published examples of transparent reporting. The STROBE checklist is best used in conjunction with this article (freely available on the Web sites of PLoS Medicine at <http://www.plosmedicine.org/>, Annals of Internal Medicine at

1  
2  
3  
4  
5  
6  
7  
8  
9  
10  
11  
12  
13  
14  
15  
16  
17  
18  
19  
20  
21  
22  
23  
24  
25  
26  
27  
28  
29  
30  
31  
32  
33  
34  
35  
36  
37  
38  
39  
40  
41  
42  
43  
44  
45  
46  
47  
48  
49  
50  
51  
52  
53  
54  
55  
56  
57  
58  
59  
60

<http://www.annals.org/>, and *Epidemiology* at <http://www.epidem.com/>). Information on the STROBE Initiative is available at <http://www.strobe-statement.org>.

For peer review only

# BMJ Open

## Examining the Risk of Depression or Self-Harm Associated with Incretin-based Therapies Used to Manage Hyperglycemia in Patients with Type 2 Diabetes: A Cohort Study Using the UK Clinical Practice Research Datalink

|                                 |                                                                                                                                                                                                                                                                                                                                                                                                                                                                                                                                |
|---------------------------------|--------------------------------------------------------------------------------------------------------------------------------------------------------------------------------------------------------------------------------------------------------------------------------------------------------------------------------------------------------------------------------------------------------------------------------------------------------------------------------------------------------------------------------|
| Journal:                        | <i>BMJ Open</i>                                                                                                                                                                                                                                                                                                                                                                                                                                                                                                                |
| Manuscript ID                   | bmjopen-2018-023830.R1                                                                                                                                                                                                                                                                                                                                                                                                                                                                                                         |
| Article Type:                   | Research                                                                                                                                                                                                                                                                                                                                                                                                                                                                                                                       |
| Date Submitted by the Author:   | 14-Aug-2018                                                                                                                                                                                                                                                                                                                                                                                                                                                                                                                    |
| Complete List of Authors:       | Gamble, John Michael; University of Waterloo, School of Pharmacy; Memorial University of Newfoundland, School of Pharmacy<br>Chibrikov, Eugene; Memorial University of Newfoundland, School of Pharmacy and Faculty of Medicine; University of Waterloo, School of Pharmacy<br>Midodzi, William; Memorial University of Newfoundland, Faculty of Medicine<br>Twells, Laurie; Memorial University of Newfoundland, School of Pharmacy and Faculty of Medicine<br>Majumdar, Sumit; University of Alberta, Department of Medicine |
| <b>Primary Subject Heading</b>: | Diabetes and endocrinology                                                                                                                                                                                                                                                                                                                                                                                                                                                                                                     |
| Secondary Subject Heading:      | Pharmacology and therapeutics, Epidemiology                                                                                                                                                                                                                                                                                                                                                                                                                                                                                    |
| Keywords:                       | General diabetes < DIABETES & ENDOCRINOLOGY, EPIDEMIOLOGY, Depression & mood disorders < PSYCHIATRY, cohort study, pharmacoepidemiology                                                                                                                                                                                                                                                                                                                                                                                        |
|                                 |                                                                                                                                                                                                                                                                                                                                                                                                                                                                                                                                |

SCHOLARONE™  
Manuscripts

1  
2 **Examining the Risk of Depression or Self-Harm Associated with Incretin-based Therapies**  
3 **Used to Manage Hyperglycemia in Patients with Type 2 Diabetes: A Cohort Study Using the**  
4 **UK Clinical Practice Research Datalink**  
5

6  
7 John-Michael Gamble<sup>1,2</sup>, Eugene Chibrikov<sup>1,2,3</sup>, William K Midodzi<sup>3</sup>, Laurie K Twells<sup>2,3</sup>, Sumit R  
8 Majumdar<sup>† 4</sup>  
9

10  
11  
12 1. School of Pharmacy, Faculty of Science, University of Waterloo, Waterloo, Ontario, Canada

13  
14 2. School of Pharmacy, Memorial University of Newfoundland, St. John's, Newfoundland and  
15 Labrador, Canada

16  
17 3. Faculty of Medicine, Memorial University of Newfoundland, St. John's, Newfoundland and  
18 Labrador, Canada

19  
20 4. Division of General Internal Medicine, Department of Medicine, University of Alberta, Edmonton,  
21 Alberta, Canada  
22  
23  
24  
25

26 **Correspondence to:**

27 John-Michael Gamble

28 School of Pharmacy

29 University of Waterloo

30 10A Victoria Street South

31 Kitchener, ON, Canada N2G 2C5

32 Phone: (519) 888-4567, ext. 21343 Fax: (519) 883-7580

33 Email: [jm.gamble@uwaterloo.ca](mailto:jm.gamble@uwaterloo.ca)  
34  
35  
36  
37  
38  
39  
40  
41

42 **Abbreviated Title:** Depression and Self-Harm Among Incretin-based Therapy Users  
43

44  
45 Key terms: cohort study, type 2 diabetes, dipeptidyl-peptidase 4 inhibitors, glucagon-like receptor 1  
46 agonists, depression, suicide, self-harm  
47  
48

49 **Counts:** Abstract=290; Manuscript= 3079; Figures=3; Tables=3; References=45  
50  
51  
52  
53  
54  
55  
56  
57  
58

59 <sup>†</sup> Deceased January 19, 2018

## Abstract

**Objectives:** To compare population-based incidence rates of new-onset depression or self-harm in patients initiating incretin-based therapies with that of sulfonylureas (SU) and other glucose-lowering agents.

**Design:** Population-based cohort study

**Setting:** Patients attending primary care practices registered with the UK-based Clinical Practice Research Datalink (CPRD).

**Participants:** Using the UK-based Clinical Practice Research Datalink (CPRD), we identified two incretin-based therapies cohorts: (1) DPP-4i-cohort, consisting of new-users of DPP-4 inhibitors and sulfonylureas, and (2) GLP-1RA-cohort, consisting of new-users of GLP-1 receptor agonists and sulfonylureas, between Jan-2007 and Jan-2016. Patients with a prior history of depression, self-harm, and other serious psychiatric conditions were excluded.

**Main outcome measures:** The primary study outcome comprised a composite of new-onset depression or self-harm. Unadjusted and adjusted Cox proportional hazards regression was used to quantify the association between incretin-based therapies and depression or self-harm. Deciles of high-dimensional propensity scores and concurrent number of glucose-lowering agents were used to adjust for potential confounding.

**Results:** We identified new-users of 6206 DPP-4i and 22128 sulfonylureas in the DPP-4i-cohort, and 501 GLP-1RA and 16409 sulfonylurea new-users in the GLP-1RA-cohort. The incidence of depression or self-harm was 8.2 vs. 11.7 events/1000-person-years in the DPP-4i-cohort and 18.2 vs. 13.6 events/1000-person-years in the GLP-1RA-cohort for incretin-based therapies vs sulfonylureas, respectively. Incretin-based therapies were not associated with an increased or decreased incidence of depression or self-harm compared to sulfonylureas (DPP-4i-cohort: unadjusted hazard ratio (HR) 0.70, 95% confidence interval (CI): 0.51-0.96) adjusted HR 0.80, 95% CI: 0.57-1.13; GLP-1RA-cohort: unadjusted hazard ratio (HR) 1.36, 95% confidence interval (CI): 0.72-2.58; adjusted HR 1.25, 95% CI: 0.63-2.50). Consistent results were observed for other glucose-lowering comparators including insulin and thiazolidinediones.

**Conclusions:** Our findings suggest that the two incretin-based therapies are not associated with an increased or decreased risk of depression or self-harm.

### Strengths and limitations of the study

- Incretin-based therapies, dipeptidyl peptidase-4 inhibitors [DPP-4i] and glucagon-like peptide-1 receptor agonists [GLP-1RA], used to manage hyperglycemia in patients with type 2 diabetes may have neuropsychiatric effects due to GLP-1 receptor expression in the central nervous system
- This study found that initiation of an incretin-based therapy, either a DPP-4 inhibitor or a GLP-1RA, does not appear to substantially increase or decrease the risk of depression or self-harm in patients with type 2 diabetes
- This study used a new-user active comparator design with high dimensional propensity scores to control for confounding
- This study cannot rule out small or modest difference in risk of depression or self-harm between incretin-based therapy users and other glucose-lowering due to study power limitations

### Introduction

Patients with diabetes frequently have coexisting depression with a prevalence ranging from 12% to 27%.<sup>[1]</sup> Depression is not only associated with diabetes but with an increased risk of diabetes-related complications,<sup>[2]</sup> decreased quality of life,<sup>[3]</sup> and decreased life-expectancy.<sup>[4]</sup> Diabetes is also associated with new-onset depression; however, the temporal association between diabetes and depression remains unclear.<sup>[5,6]</sup> Moreover, diabetes is associated with an increased risk of intentional self-harm,<sup>[7,8]</sup> albeit there is significant heterogeneity between studies assessing the association between diabetes and suicide.<sup>[9]</sup> It has been postulated that certain glucose-lowering pharmacotherapies may have a positive influence on the symptoms of depression, although the evidence is sparse.<sup>[10–15]</sup> The incretin-based therapies in particular may have neuropsychiatric effects given the presence of glucagon-like peptide-1 (GLP-1) receptors in the central nervous system.<sup>[16,17]</sup>

Concerns surrounding central nervous system effects stem from a case report of exenatide-induced depression and from pooled adverse event data from pre-marketing clinical trials for sitagliptin.<sup>[18–20]</sup> Pooled event rates for the latter suggested a 4-fold increased risk of suicide ideation and completed suicide in sitagliptin users compared to non-users.<sup>[19,21]</sup> Animal models suggest adverse neuropsychiatric effects are biologically plausible given the expression of GLP-1 receptors in the brain.<sup>[20]</sup> Furthermore, studies have



1  
2 shown low dipeptidyl peptidase-4 (DPP-4) activity is correlated with depression.[22–24]  
3  
4 Although the case-report mentioned above suggested a potential increased risk of  
5 depression, a recent study reported positive effects of GLP-1 receptor agonists on patients  
6 well-being.[25] Therefore alternations in DPP-4 enzymatic activity may modulate the  
7 pathophysiology of neuropsychiatric conditions such as major depression.  
8  
9

10  
11 Using data from a population-based cohort of patients with type 2 diabetes, we aimed  
12 to quantify the association between incretin-based therapies and the composite of new-onset  
13 depression and self-harm.  
14  
15

16  
17  
18  
19  
20  
21  
22  
23  
24  
25  
26  
27  
28  
29  
30  
31  
32  
33  
34  
35  
36  
37  
38  
39  
40  
41  
42  
43  
44  
45  
46  
47  
48  
49  
50  
51  
52  
53  
54  
55  
56  
57  
58  
59  
60

For peer review only

## Methods

### *Study Design and Data Sources*

We conducted a population-based cohort study using data from the Clinical Practice Research Datalink (CPRD), which captures electronic medical information for primary care encounters by general practitioners in the United Kingdom (UK).[26] The CPRD contains de-identified individual-level longitudinal data collected from a subset of primary care practices (~700) in the UK. The CPRD data is a representative sample that is similar to the overall UK population in age, sex, and ethnicity.[27] The database includes sociodemographic and lifestyle variables (e.g., alcohol consumption), physiological measures (e.g., blood pressure), laboratory testing (e.g., glycated hemoglobin [A1c]), physician-assigned diagnoses using the Read classification system, and prescription records from general practitioner records. Data quality checks are performed in accordance with standardized guidelines that certify practices as up-to-standard. Furthermore, over 350 validation studies have been performed using the CPRD.[28,29] Information on hospitalizations and causes of death are available for a subset of CPRD patients through linkages with the external databases. Details regarding the data quality, linkages, and utility are available elsewhere.[30] The CPRD has been used extensively to study associations between drugs and depression and self-harm.[31–35] Our study protocol was approved by the Independent Scientific Advisory Committee (ISAC 15\_016RARA, August 2017) and received approval from the Health Research Ethics Board at Memorial University.

### *Study Cohorts*

Our source population consisted of all patients over 18 years of age with a minimum of 12-months of up-to-standard medical history in the CPRD database that received a new diagnosis for type 2 diabetes or a new prescription for any glucose-lowering therapy between January 1, 2001 and the February 2016 CPRD dataset build. We used a 365-day washout period to define a new diagnosis or new glucose-lowering therapy use. A sub-cohort of patients (~58%) selected from the source population was linked to Hospital Episode Statistics (HES – follow-up until 31March2014), Office of National Statistics (ONS – follow-up until 30April2014), and index of multiple deprivation (IMD [2010]) data to capture hospital records, causes of death, and socioeconomic status information, respectively. Women with polycystic ovarian syndrome, gestational diabetes, or whom were pregnant during the study period were

1  
2 excluded. In addition, we excluded patients with a study entry date prior to January 1, 2007 as  
3 the first incretin-based therapies became available in the UK in early 2007.  
4  
5

6  
7 We identified two main study cohorts. Specifically, the first cohort consisted of new-  
8 users of DPP-4 inhibitors and new-users of sulfonylureas (DPP-4 inhibitor cohort) and the  
9 second cohort consisted of new-users of GLP-1 receptor agonists and new-users of  
10 sulfonylureas (GLP-1 receptor agonist cohort). Although new-users of sulfonylureas served as  
11 the reference population for both cohorts, these individuals were selected separately for each  
12 cohort as prior use of other non-incretin glucose-lowering agents was permitted. To minimize  
13 potential selection bias within the above cohorts, we excluded patients with a history of  
14 depression, self-harm, anxiety, and other serious psychiatric conditions in the year prior to a  
15 patient's cohort entry date.  
16  
17  
18  
19  
20  
21  
22  
23

### 24 ***Exposure and Outcome Definitions***

25  
26  
27 Within each incretin-based therapy cohort, we defined person-time exposure to all  
28 classes of glucose-lowering therapy including (1) DPP-4 inhibitors, (2) GLP-1 receptor  
29 agonists, (3) Sulfonylureas, (4) Metformin, (5) Thiazolidinediones, (6) Sodium glucose co-  
30 transporter-2 inhibitors, (7) Meglitinides, (8) Acarbose, (9) Insulin, and (10) no glucose-  
31 lowering drug therapy (i.e. diet/lifestyle). Patient's contributed person-time to each of the  
32 aforementioned categories on the day of their first prescription or date of diagnosis (defined  
33 as the patient's index date) until a patient discontinued the drug, left a CPRD practice, died, or  
34 on the final date of follow-up, whichever occurred first. To account for potential non-  
35 adherence, we included a portion of follow-up time following the end of the expected  
36 medication supply that was equivalent to 50% of the prescription duration as a period of  
37 exposure.  
38  
39  
40  
41  
42  
43  
44  
45

46 Our primary outcome the composite of either new-onset depression or self-harm,  
47 including suicide and suicidal ideation. If a patient experienced more than one event, the date  
48 of the first event was used. New-onset depression or episodes of self-harm were identified  
49 using diagnostic codes from either the CPRD, HES, or ONS data sources (specific codes  
50 available in supplemental material in Appendices A and B).  
51  
52  
53  
54  
55  
56  
57  
58  
59  
60

## **Statistical Analysis**

Unadjusted and adjusted Cox proportional hazards regression was used to quantify the association between incretin-based therapies and depression or self-harm. Our primary exposure contrasts of interest were DPP-4 inhibitors vs. sulfonylureas and GLP-1 receptor agonists vs. sulfonylureas within the DPP-4 inhibitor and GLP-1 receptor agonists cohorts respectively. Sulfonylureas were chosen a priori as the main reference group given their use in clinical practice as second or third agents resembles incretin-based therapies. Patients contributed follow-up time from the initiation of the incretin-based therapy of interest or comparator until they experienced the composite outcome of interest or were censored. Censoring occurred upon the earliest date of the following events: discontinuation of the incretin-based therapy of interest or comparator, switching between an incretin-based therapy to the comparator (or vice-versa), leaving a CPRD practice site, death, end of study period.

To adjust for potential confounders, we used a high-dimensional propensity score (hdPS) algorithm to select up to 40 empirical covariates.[36] Using a multivariable logistic regression model that included the both empirically derived and predefined (age, sex, alcohol abuse, body mass index, duration of treated diabetes, comorbidities, number of hospitalizations, HbA1c, prior medications use, smoking status, socioeconomic status [quintiles of the index of multiple deprivation], use of other glucose-lowering therapies, year of cohort entry. A detailed list of covariates forced into propensity score model is shown in Appendix C) covariates, we calculated the probability of initiating a DPP-4 inhibitor versus a sulfonylurea (or comparator for sensitivity analysis). Patients with overlapping propensity scores were included in the analysis. A separate hdPS procedure was run for the GLP-1 receptor agonist cohort. Adjusted hazard ratios and 95% confidence intervals were calculated using a Cox proportional hazards regression model with deciles of the hdPS and variable indicating the number of glucose-lowering agents during follow-up (1, 2, 3 or more). We used standard graphical approaches to assess model assumptions for which no violations were noted.

Secondary analyses included alternative comparator groups and components of composite outcome (i.e., depression and self-harm as separate outcomes). In addition, we conducted several additional sensitivity analyses. First, we used two alternative methods to adjust for potential confounding including a matched propensity score approach (1:1 -

1  
2 matching using greedy nearest neighbor approach with a caliper set at 0.2 times the standard  
3 deviation of the natural logarithm of the propensity score) and grouping patients with identical  
4 patterns of glucose-lowering therapies prior to and following cohort initiation. For the latter  
5 approach, an example of how we grouped patients is as follows. Patients who started with  
6 metformin monotherapy and added an incretin-based therapy would be grouped with patients  
7 who also started metformin monotherapy and then added the comparator drug of interest.  
8 Groups with less than 25 patients were excluded from this analysis. We used a categorical  
9 variable to adjust for all groups within our multivariable Cox proportional hazards model.  
10 Second, we ran several analyses using restricted cohorts including restricting our cohort to  
11 patients eligible for HES/ONS linkage (i.e., patients with hospital and death certificate  
12 records), restricting to monotherapy users, restricting to a cohort of metformin monotherapy  
13 users who added the incretin-based therapy of interest or a sulfonylurea. Third, we added  
14 BMI (as a categorical variable) to Cox proportional hazards model given that weight may be a  
15 confounding factor.[37,38] Fourth, we used time-dependent variables to classify our  
16 exposures of interest throughout follow-up time. All analyses were conducted with R version  
17 3.3.3.  
18  
19  
20  
21  
22  
23  
24  
25  
26  
27  
28  
29  
30

### 31 ***Patient and Public Involvement***

32 No patients were involved in any aspect of the study.  
33  
34  
35  
36

## 37 **Results**

### 38 *DPP-4 Inhibitor Cohort*

39 Within the DPP-4 inhibitor new user cohort, there were 6206 initiators of a DPP-4  
40 inhibitor and 22128 initiators of a sulfonylurea (Figure 1). The mean (standard deviation)  
41 follow-up time was 324 (362) days for DPP-4 inhibitor users and 299 (385) days for  
42 sulfonylurea users. Compared to sulfonylurea users, DPP-4 inhibitor users were on average  
43 younger, had fewer hospitalizations in the year prior to cohort entry, and less likely to have  
44 impaired kidney function. Patient characteristics were well-balanced following propensity  
45 score matching (Table 1). There were a total 264 patients identified with new-onset  
46 depression or self-harm.  
47  
48  
49  
50  
51  
52  
53

54 The incidence of depression or self-harm was 8.2 per 1000 person-years in DPP-4  
55 inhibitor users compared to 11.7 per 1000 person-years in sulfonylurea users (unadjusted  
56  
57  
58  
59  
60

1 hazard ratio (HR): 0.70 95% confidence interval (CI) 0.51-0.96 [table 2]). Similarly, the crude  
2 incidence rates were smaller for DPP-4 inhibitor users versus other comparators (10.0 vs.  
3 10.8 per 1000 person-years for TZDs; 9.8 vs. 20.7 for insulin users). However, following  
4 adjustment for potential confounding variables, there was no significant association between  
5 DPP-4 inhibitor use and the risk of depression or self-harm for all comparator groups  
6 (sulfonylurea comparator: adjusted HR 0.80, 95% CI 0.57-1.13; TZD comparator: adjusted  
7 HR 1.17, 95% CI 0.70-1.96; insulin comparator: adjusted HR 0.98, 95% CI 0.53-1.83).  
8 Appendices D and E show the results for the risks of depression and self-harm separately.  
9

### 17 *GLP-1 Receptor Agonist Cohort*

19 Within the GLP-1 receptor agonist cohort, there were 501 initiators of a GLP-1 receptor  
20 agonist and 16409 initiators of a sulfonylurea (Figure 1). The mean (standard deviation)  
21 follow-up time was 397 (409) days for GLP-1 receptor agonist users and 292 (373) days for  
22 sulfonylurea users. Compared to sulfonylurea users, GLP-1 receptor agonist users were on  
23 average younger, more likely female, used more drugs in the year prior to cohort entry, had a  
24 lower baseline HbA1c, more likely to have used several medications prior to cohort entry  
25 including insulin, SSRIs, or other antidepressant. Following propensity score matching,  
26 baseline patient characteristics were well-balanced (Table 3). There were a total 193 patients  
27 identified with new-onset depression or self-harm.  
28

29 The incidence rate of depression or self-harm was non-significantly higher for GLP-1  
30 receptor users compared to sulfonylurea users (18.2 vs. 13.6 per 1000 person-years;  
31 unadjusted HR 1.36, 95% CI 0.72-2.58; adjusted HR 1.25, 95% CI 0.63-2.50), TZDs (16.4 vs.  
32 12.5 per 1000 person-years; unadjusted HR 1.32, 95% CI 0.72-2.42; adjusted HR 1.18, 95%  
33 CI 0.53-2.65), and insulin users (13.6 vs. 20.7 per 1000 person-years; unadjusted HR 0.74,  
34 95% CI 0.35-1.56; adjusted HR 1.07, 95% CI 0.39-2.94). All measured associations remained  
35 non-significant following adjustment for potential confounders (Table 2). Appendix D shows  
36 the results for depression analyzed as a separate outcome. We were unable to analyze  
37 results for self-harm separately, due to small numbers of events (Appendix E).  
38  
39  
40  
41  
42  
43  
44  
45  
46  
47  
48  
49  
50

### 51 *Sensitivity Analyses*

52 Figures 2 and 3 provide the number of events per treatment exposure group and  
53 measures of association for selected sensitivity analyses across the main DPP-4 inhibitor and  
54  
55  
56  
57  
58  
59  
60

1  
2 GLP-1 receptor agonist cohorts. There were too few events to run a stable statistical model  
3 for all pre-specified sensitivity analyses (e.g. new monotherapy users); however, findings from  
4 models that were run were consistent with our main results suggesting that DPP-4 inhibitor  
5 use did not have an increased or decreased risk of new-onset depression (Appendix F to L).  
6  
7  
8  
9  
10

## 11 **Discussion**

12  
13  
14 New users of DPP-4 inhibitors and new users of GLP-1 receptor agonists did not have  
15 an increased or decreased risk of a new diagnosis of depression or episode of self-harm.  
16 These findings extend our current knowledge regarding the relative safety of the incretin-  
17 based therapies used to manage hyperglycemia in patients with type 2 diabetes.  
18  
19

20  
21 The impetus for our study was the safety signal generated by randomized controlled  
22 trials and a case-report suggesting that incretin-based therapies may affect the risk of  
23 depression or self-harm. Specifically, early trial data found a 4-times greater risk of suicidal  
24 ideation or completed suicide in sitagliptin users vs glipizide users.[19,21] A higher incidence  
25 of depression was also observed in the long-term safety population among phase-3 clinical  
26 trial in sitagliptin 100mg users (13/429) compared to placebo (0/154); however, the incidence  
27 of psychiatric events was no different among pooled phase 3 studies (3.0% in sitagliptin  
28 100mg users; 2.4% in sitagliptin 200mg users, and 3.2% in placebo users).[20] Moreover, a  
29 case-report has also been published regarding exenatide-induced depression.[18]  
30  
31

32  
33 Despite our findings suggesting a lack of association between incretin-based agents  
34 and depression or self-harm, there is a substantial evidence-base from animal models that  
35 suggest incretin-based therapies may affect mood disorders. Anderberg and colleagues found  
36 differential effects of acute versus chronic exposure to a GLP-1 receptor agonist.[39] Acute  
37 activation of GLP-1 receptors was associated with anxiogenic effects, whereas chronic GLP-1  
38 receptor activation did not elicit anxiogenic effects in Sprague-Dawley rats. In fact, chronic  
39 exposure to a GLP-1 receptor agonist was associated with a decrease in depressive-like  
40 behavior. Furthermore, acute stimulation of GLP-1 receptors affected serotonin turnover and  
41 serotonin receptor expression in the amygdala; however, chronic stimulation did not affect  
42 serotonin turnover or receptor expression. In addition to effects on serotonin, activation of  
43 GLP-1 may have mood effects through impacting central dopamine levels.[40] A mice model  
44 suggests that liraglutide, a GLP-1 receptor agonist, has antipsychotic properties possibly  
45  
46  
47  
48  
49  
50  
51  
52  
53  
54  
55  
56  
57  
58  
59  
60



1  
2 through its affecting dopamine activity in the brain.[41] Interestingly, the DPP-4 inhibitor  
3 sitagliptin, did not exhibit the same antipsychotic properties.  
4

5 Another possible mechanism by which glucose lowering therapies may affect mood  
6 disorders is through the reduction in inflammatory cytokines/mediators. Moulton et al reported  
7 improvement in depressive symptoms over 1-year in a cohort of 1735 newly diagnosed  
8 patients with type 2 diabetes.[10] The improvement in depressive symptoms measure by the  
9 PHQ-9 was independent of change in glycemic control and was correlated with a change in  
10 the inflammatory marker hs-CRP. Furthermore, a meta-analysis found that pioglitazone was  
11 associated with a reduction in symptoms of depression compared to placebo (pooled odds  
12 ratio = 3.3, 95% confidence interval 1.4 to 7.8).[11] A 12-week open-label study also found  
13 that pioglitazone was associated with a reduction in depression symptoms as well as a  
14 decrease in c-reactive protein and decreased insulin resistance.[12] Indeed, a population-  
15 based cross-sectional study found that numerous inflammatory markers (e.g., c-reactive  
16 protein, interleukin-1 receptor agonist, monocyte chemotactic protein-1, white blood cell count,  
17 triglyceride) were associated with depression in patients with type 2 diabetes.[42] To further  
18 test this hypothesis among DPP-4 inhibitor users, there is an ongoing small clinical trial  
19 evaluating the effect of sitagliptin on symptoms of depression in the elderly (EudraCT  
20 Number: 2015-004527-32).[43]  
21  
22  
23  
24  
25  
26  
27  
28  
29  
30  
31  
32

33 Our study is subject to the standard limitations of observational cohort studies including  
34 the potential for residual and unmeasured confounding. Although we adjusted for over 70  
35 potential confounders using an HdPS approach, we were not able to capture all relevant  
36 potential confounders such as severity of depressive symptoms and patient level  
37 socioeconomic status. Our follow-up time was also limited (DPP-4 cohort mean follow-up time  
38 = 305 days; GLP-1 receptor agonist cohort mean follow-up = 296 days), therefore, it is  
39 possible that a longer time frame was required to detect an association. However, it would be  
40 expected that an effect on depression symptoms mediated by serotonin or dopaminergic  
41 central pathways would be apparent after 4 to 6 weeks or sooner. There were a limited  
42 number of self-harm events and our study was not powered to detect clinically relevant  
43 differences across exposure groups for this component of our composite outcome. Similarly,  
44 given the lower and upper limits of the 95% confidence intervals, our study cannot rule out  
45 small or moderate differences in the risk of depression across exposure groups.  
46  
47  
48  
49  
50  
51  
52  
53  
54

55 Misclassification of the exposure or outcome variables of interest may have also impacted our  
56  
57  
58  
59  
60

1 findings. Our exposure variables of interest (incretin-based therapies) were measured based  
2 on primary care prescription records and therefore may overestimate true exposure due to  
3 primary and secondary non-adherence. In addition, prescriptions written by specialists are not  
4 captured in the CPRD. It is possible that when the incretin-based therapies were introduced  
5 they were more frequently prescribed by specialists and our study would miss the initial  
6 prescription, however, subsequent prescriptions written by general practitioners would be  
7 captured. Previous studies have shown that depression is likely underestimated using  
8 diagnostic codes, although positive predictive values have generally been greater than 90%  
9 using ICD-10 codes.[44] Under-ascertainment of depression would likely be non-differential  
10 between our exposure groups of interest and therefore bias our findings toward the null.  
11 Suicide and self-harm have also been shown to be underestimated using CPRD data and the  
12 use of linked mortality data via the Office of National Statistics improves the sensitivity for  
13 capturing suicide and self-harm; however, underreporting of events is still expected.[45] In  
14 addition, the role of incretin-based agents may have shifted over time whereby when they  
15 were first introduced to the market were not used commonly as 2<sup>nd</sup> line agents and  
16 sulfonylureas may have been used as first or second-line agents. We attempted to control for  
17 both temporal trends and timing of therapy by using calendar time, duration of and prior  
18 exposure of glucose-lowering therapies as covariates in the propensity score.  
19  
20  
21  
22  
23  
24  
25  
26  
27  
28  
29  
30  
31  
32

33 Our findings provide some reassurance regarding the safety of the incretin-based  
34 therapies in the treatment of type 2 diabetes. Specifically, our study results suggest that there  
35 is not a clinically relevant association between either DPP-4 inhibitors or GLP-1 receptor  
36 agonists and depression or self-harm.  
37  
38  
39  
40  
41  
42  
43  
44  
45  
46  
47  
48  
49  
50  
51  
52  
53  
54  
55  
56  
57  
58  
59  
60

1  
2 **Authors' Contributions:** JMG, EC, WKM, LKT and SRM, were involved in the concept and  
3 design of the study. JMG was responsible for drafting the first version of the manuscript. All  
4 authors contributed to the interpretation of data. JMG, EC, WKM, and LKT provided revisions  
5 to the manuscript. JMG will act as guarantor for the study.  
6  
7  
8  
9

10 **Acknowledgements:** JMG is supported as a New Investigator Award from the Canadian  
11 Institute of Health Research and a Clinician Scientist Award from Diabetes Canada. This  
12 study is based in part on data from the Clinical Practice Research Datalink obtained under  
13 licence from the UK Medicines and Healthcare products Regulatory Agency. However, the  
14 interpretation and conclusions contained in this study are those of the author/s alone.  
15  
16  
17  
18  
19

20 **Funding Support:** This work was supported by an operating grant from the Canadian  
21 Institute for Health Research (FRN173599 – 287647).  
22  
23  
24  
25

26 **Competing Interest:** All authors have completed the Unified Competing Interest form at  
27 [www.icmje.org/coi\\_disclosure.pdf](http://www.icmje.org/coi_disclosure.pdf) (available on request from the corresponding author) and  
28 declare no support from any organization for the submitted work; no financial relationships  
29 that may be relevant to the submitted work; and no other relationships or activities that could  
30 appear to have influence the submitted work.  
31  
32  
33  
34  
35

36 **Ethical approval:** This study was approved by the Independent Scientific Advisory  
37 Committee (ISAC 15\_016RARA) and received approval from the Health Research Ethics  
38 Board at Memorial University.  
39  
40  
41  
42

43 **Copyright:** The Corresponding Author has the right to grant on behalf of all authors and  
44 does grant on behalf of all authors, a [worldwide licence](#) to the Publishers and its licensees in  
45 perpetuity, in all forms, formats and media (whether known now or created in the future), to i)  
46 publish, reproduce, distribute, display and store the Contribution, ii) translate the Contribution  
47 into other languages, create adaptations, reprints, include within collections and create  
48 summaries, extracts and/or, abstracts of the Contribution, iii) create any other derivative  
49 work(s) based on the Contribution, iv) to exploit all subsidiary rights in the Contribution, v) the  
50 inclusion of electronic links from the Contribution to third party material where-ever it may be  
51  
52  
53  
54  
55  
56  
57  
58  
59  
60

1  
2 located; and, vi) licence any third party to do any or all of the above.  
3  
4

5 **Transparency:** The lead author (the manuscript's guarantor) affirms that the manuscript is an  
6 honest, accurate, and transparent account of the study being reported; that no important  
7 aspects of the study have been omitted; and that any discrepancies from the study as  
8 planned (and, if relevant, registered) have been explained.  
9  
10  
11  
12

13  
14 **Data Sharing:** no additional data available.  
15  
16  
17  
18  
19  
20  
21  
22  
23  
24  
25  
26  
27  
28  
29  
30  
31  
32  
33  
34  
35  
36  
37  
38  
39  
40  
41  
42  
43  
44  
45  
46  
47  
48  
49  
50  
51  
52  
53  
54  
55  
56  
57  
58  
59  
60

**REFERENCES**

- 1 Holt RIG, Groot M de, Lucki I, *et al.* NIDDK International Conference Report on Diabetes and Depression: Current Understanding and Future Directions. *Diabetes Care* 2014;**37**:2067–77. doi:10.2337/dc13-2134
- 2 Association of Depression and Diabetes Complications: A Meta... : Psychosomatic Medicine. LWW. [http://journals.lww.com/psychosomaticmedicine/Fulltext/2001/07000/Association\\_of\\_Depression\\_and\\_Diabetes.15.aspx](http://journals.lww.com/psychosomaticmedicine/Fulltext/2001/07000/Association_of_Depression_and_Diabetes.15.aspx) (accessed 18 Apr 2017).
- 3 Ali S, Stone M, Skinner TC, *et al.* The association between depression and health-related quality of life in people with type 2 diabetes: a systematic literature review. *Diabetes Metab Res Rev* 2010;**26**:75–89. doi:10.1002/dmrr.1065
- 4 Holt RIG, de Groot M, Golden SH. Diabetes and Depression. *Curr Diab Rep* 2014;**14**:491. doi:10.1007/s11892-014-0491-3
- 5 Knol MJ, Twisk JWR, Beekman ATF, *et al.* Depression as a risk factor for the onset of type 2 diabetes mellitus. A meta-analysis. *Diabetologia* 2006;**49**:837. doi:10.1007/s00125-006-0159-x
- 6 Golden SH, Lazo M, Carnethon M, *et al.* Examining a Bidirectional Association Between Depressive Symptoms and Diabetes. *JAMA J Am Med Assoc* 2008;**299**:2751–9. doi:10.1001/jama.299.23.2751
- 7 Collaboration ERF, Seshasai SRK, Kaptoge S, *et al.* Diabetes mellitus, fasting glucose, and risk of cause-specific death. *N Engl J Med* 2011;**364**:829–841. doi:10.1056/NEJMoa1008862
- 8 Singhal A, Ross J, Seminog O, *et al.* Risk of self-harm and suicide in people with specific psychiatric and physical disorders: comparisons between disorders using English national record linkage. *J R Soc Med* 2014;**107**:194–204. doi:10.1177/0141076814522033
- 9 Wang Y, Tang S, Xu S, *et al.* Association between diabetes and risk of suicide death: A meta-analysis of 3 million participants. *Compr Psychiatry* 2016;**71**:11–6. doi:10.1016/j.comppsy.2016.08.006
- 10 Moulton CD, Pickup JC, Amiel SA, *et al.* Investigating incretin-based therapies as a novel treatment for depression in type 2 diabetes: Findings from the South London Diabetes (SOUL-D) Study. *Prim Care Diabetes* 2016;**10**:156–9. doi:10.1016/j.pcd.2015.06.003
- 11 Colle R, de Larminat D, Rotenberg S, *et al.* Pioglitazone could induce remission in major depression: a meta-analysis. *Neuropsychiatr Dis Treat* 2016;**13**:9–16. doi:10.2147/NDT.S121149
- 12 Kemp DE, Ismail-Beigi F, Ganocy SJ, *et al.* Use of Insulin Sensitizers for the Treatment of Major Depressive Disorder: A Pilot Study of Pioglitazone for Major Depression Accompanied by Abdominal Obesity. *J Affect Disord* 2012;**136**:1164–73. doi:10.1016/j.jad.2011.06.033
- 13 Wahlqvist ML, Lee M-S, Chuang S-Y, *et al.* Increased risk of affective disorders in type 2 diabetes is minimized by sulfonylurea and metformin combination: a population-based cohort study. *BMC Med* 2012;**10**:150. doi:10.1186/1741-7015-10-150

- 1  
2 14 Berge LI, Riise T, Tell GS, *et al.* Depression in Persons with Diabetes by Age and Antidiabetic  
3 Treatment: A Cross-Sectional Analysis with Data from the Hordaland Health Study. *PLoS ONE*  
4 2015;**10**. doi:10.1371/journal.pone.0127161  
5
- 6 15 Bode BW, Testa MA, Magwire M, *et al.* Patient-reported outcomes following treatment with the  
7 human GLP-1 analogue liraglutide or glimepiride in monotherapy: results from a randomized  
8 controlled trial in patients with type 2 diabetes. *Diabetes Obes Metab* 2010;**12**:604–12.  
9 doi:10.1111/j.1463-1326.2010.01196.x  
10
- 11 16 Alvarez E, Roncero I, Chowen JA, *et al.* Expression of the glucagon-like peptide-1 receptor gene in  
12 rat brain. *J Neurochem* 1996;**66**:920–7.  
13  
14
- 15 17 Lockie SH. Glucagon-Like Peptide-1 Receptor in the Brain: Role in Neuroendocrine Control of  
16 Energy Metabolism and Treatment Target for Obesity. *J Neuroendocrinol* 2013;**25**:597–604.  
17 doi:10.1111/jne.12039  
18
- 19 18 Kohen I, Lester P. Exenatide-induced depression in a geriatric patient. *Int J Geriatr Psychiatry*  
20 2008;**23**:443–4.  
21  
22
- 23 19 European Medicines Agency. Januvia: European Public Assessment Report (EPAR) - Scientific  
24 Discussion. European Medicines Agency 2007.  
25
- 26 20 U.S. Food and Drug Administration - Center For Drug Evaluation and Research. Application  
27 number: 21-995 Medical review. 2006.  
28 [http://www.accessdata.fda.gov/drugsatfda\\_docs/nda/2006/021995s000\\_MedR.pdf](http://www.accessdata.fda.gov/drugsatfda_docs/nda/2006/021995s000_MedR.pdf) (accessed 24  
29 Nov 2014).  
30
- 31 21 Prescrire Editorial Staff. Sitagliptin. Type 2 diabetes: limited efficacy, too many unknown risks.  
32 *Prescrire Int* 2008;**17**:12–5.  
33  
34
- 35 22 Maes M, De Meester I, Scharpe S, *et al.* Alterations in plasma dipeptidyl peptidase IV enzyme  
36 activity in depression and schizophrenia: effects of antidepressants and antipsychotic drugs. *Acta*  
37 *Psychiatr Scand* 1996;**93**.  
38
- 39 23 Maes M, De Meester I, Vanhoof G, *et al.* Decreased serum dipeptidyl peptidase IV activity in  
40 major depression. *Biol Psychiatry* 1991;**30**:577–86.  
41  
42
- 43 24 Maes M, De Meester I, Verkerk R, *et al.* Lower serum dipeptidyl peptidase IV activity in treatment  
44 resistant major depression: relationships with immune-inflammatory markers.  
45 *Psychoneuroendocrinology* 1997;**22**.  
46
- 47 25 Grant P, Lipscomb D, Quin J. Psychological and quality of life changes in patients using GLP-1  
48 analogues. *J Diabetes Complications* 2011;**25**:244–6. doi:10.1016/j.jdiacom.2011.03.002  
49  
50
- 51 26 Gamble J-M, Thomas JM, Twells LK, *et al.* Comparative effectiveness of incretin-based therapies  
52 and the risk of death and cardiovascular events in 38,233 metformin monotherapy users: *Medicine*  
53 *(Baltimore)* 2016;**95**:e3995. doi:10.1097/MD.0000000000003995  
54
- 55 27 Herrett E, Gallagher AM, Bhaskaran K, *et al.* Data Resource Profile: Clinical Practice Research  
56 Datalink (CPRD). *Int J Epidemiol* 2015;**44**:827–36. doi:10.1093/ije/dyv098  
57  
58  
59



- 1  
2 28 Herrett E, Thomas SL, Schoonen WM, *et al.* Validation and validity of diagnoses in the General  
3 Practice Research Database: a systematic review. *Br J Clin Pharmacol* 2010;**69**:4–14.  
4 doi:10.1111/j.1365-2125.2009.03537.x  
5
- 6 29 Jick SS, Kaye JA, Vasilakis-Scaramozza C, *et al.* Validity of the general practice research database.  
7 *Pharmacotherapy* 2003;**23**:686–689.  
8
- 9 30 Williams T, Van Staa T, Puri S, *et al.* Recent advances in the utility and use of the General Practice  
10 Research Database as an example of a UK Primary Care Data resource. *Ther Adv Drug Saf*  
11 2012;**3**:89–99. doi:10.1177/2042098611435911  
12  
13
- 14 31 Bornand D, Toovey S, Jick SS, *et al.* The risk of new onset depression in association with influenza  
15 – A population-based observational study. *Brain Behav Immun* 2016;**53**:131–7.  
16 doi:10.1016/j.bbi.2015.12.005  
17
- 18 32 Hagberg KW, Li L, Peng M, *et al.* Incidence rates of suicidal behaviors and treated depression in  
19 patients with and without psoriatic arthritis using the Clinical Practice Research Datalink. *Mod*  
20 *Rheumatol* 2016;**26**:774–9. doi:10.3109/14397595.2015.1136726  
21  
22
- 23 33 Jick H, Kaye JA, Jick SS. Antidepressants and the Risk of Suicidal Behaviors. *JAMA*  
24 2004;**292**:338–43. doi:10.1001/jama.292.3.338  
25
- 26 34 Thomas KH, Martin RM, Davies NM, *et al.* Smoking cessation treatment and risk of depression,  
27 suicide, and self harm in the Clinical Practice Research Datalink: prospective cohort study. *BMJ*  
28 2013;**347**:f5704–f5704. doi:10.1136/bmj.f5704  
29  
30
- 31 35 Welk B, McArthur E, Ordon M, *et al.* Association of Suicidality and Depression With 5 $\alpha$ -  
32 Reductase Inhibitors. *JAMA Intern Med* 2017;**177**:683–91. doi:10.1001/jamainternmed.2017.0089  
33
- 34 36 Schneeweiss S, Rassen JA, Glynn RJ, *et al.* High-dimensional propensity score adjustment in  
35 studies of treatment effects using health care claims data. *Epidemiology* 2009;**20**:512–522.  
36 doi:10.1097/EDE.0b013e3181a663cc  
37
- 38 37 Sevilla-González M del R, Quintana-Mendoza BM, Aguilar-Salinas CA. Interaction Between  
39 Depression, Obesity, and Type 2 Diabetes: A Complex Picture. *Arch Med Res* 2017;**48**:582–91.  
40 doi:10.1016/j.arcmed.2018.02.004  
41  
42
- 43 38 Svenningsson I, Björkelund C, Marklund B, *et al.* Anxiety and depression in obese and normal-  
44 weight individuals with diabetes type 2: A gender perspective. *Scand J Caring Sci*; **26**:349–54.  
45 doi:10.1111/j.1471-6712.2011.00940.x  
46
- 47 39 Anderberg RH, Richard JE, Hansson C, *et al.* GLP-1 is both anxiogenic and antidepressant;  
48 divergent effects of acute and chronic GLP-1 on emotionality. *Psychoneuroendocrinology*  
49 2016;**65**:54–66. doi:10.1016/j.psyneuen.2015.11.021  
50
- 51 40 Anderberg RH, Anefors C, Bergquist F, *et al.* Dopamine signaling in the amygdala, increased by  
52 food ingestion and GLP-1, regulates feeding behavior. *Physiol Behav* 2014;**136**:135–44.  
53 doi:10.1016/j.physbeh.2014.02.026  
54  
55  
56  
57  
58  
59



- 1  
2 41 Dixit TS, Sharma AN, Lucot JB, *et al.* Antipsychotic-like effect of GLP-1 agonist liraglutide but  
3 not DPP-IV inhibitor sitagliptin in mouse model for psychosis. *Physiol Behav* 2013;**114–115**:38–  
4 41. doi:10.1016/j.physbeh.2013.03.008  
5
- 6 42 Laake J-PS, Stahl D, Amiel SA, *et al.* The Association Between Depressive Symptoms and  
7 Systemic Inflammation in People With Type 2 Diabetes: Findings From the South London  
8 Diabetes Study. *Diabetes Care* 2014;:DC\_132522. doi:10.2337/dc13-2522  
9
- 10 43 Pilot randomised controlled trial of SITAgliptin for Depressive Symptoms in type 2 diabetes  
11 (EudraCT Number: 2015-004527-32). [https://www.clinicaltrialsregister.eu/ctr-](https://www.clinicaltrialsregister.eu/ctr-search/search?query=2015-004527-32)  
12 [search/search?query=2015-004527-32](https://www.clinicaltrialsregister.eu/ctr-search/search?query=2015-004527-32) (accessed 7 Dec 2017).  
13  
14
- 15 44 Fiest KM, Jette N, Quan H, *et al.* Systematic review and assessment of validated case definitions  
16 for depression in administrative data. *BMC Psychiatry* 2014;**14**:289.  
17
- 18 45 Thomas KH, Davies N, Metcalfe C, *et al.* Validation of suicide and self-harm records in the  
19 Clinical Practice Research Datalink: Validation of suicide and self-harm records. *Br J Clin*  
20 *Pharmacol* 2013;**76**:145–57. doi:10.1111/bcp.12059  
21  
22  
23  
24  
25  
26  
27  
28  
29  
30  
31  
32  
33  
34  
35  
36  
37  
38  
39  
40  
41  
42  
43  
44  
45  
46  
47  
48  
49  
50  
51  
52  
53  
54  
55  
56  
57  
58  
59  
60

## TABLES

**Table 1. Patient Characteristics of New-user DPP-4 Inhibitor Cohort Before and After Propensity Score Matching, and GLP-1 Receptor Agonist Cohorts.**

|                                                          | DPP4 Inhibitor New User Cohort Before Propensity Score Matching |                 | DPP4 Inhibitor New User Cohort After Propensity Score Matching |                |
|----------------------------------------------------------|-----------------------------------------------------------------|-----------------|----------------------------------------------------------------|----------------|
|                                                          | DPP-4i<br>(n=6206)                                              | SU<br>(n=22128) | DPP-4i<br>(n=6008)                                             | SU<br>(n=6008) |
| Age in yrs (sd)                                          | 58(12.2)                                                        | 60.5(13.8)      | 58.1(12.2)                                                     | 58.2(12.5)     |
| Female                                                   | 2258(36.4%)                                                     | 8107(36.6%)     | 2189(36.4%)                                                    | 2187(36.4%)    |
| Measure of deprivation                                   |                                                                 |                 |                                                                |                |
| Least                                                    | 624(10.1%)                                                      | 2492(11.3%)     | 603(10%)                                                       | 594(9.9%)      |
| Most                                                     | 615(9.9%)                                                       | 2342(10.6%)     | 603(10%)                                                       | 614(10.2%)     |
| Unknown                                                  | 2862(46.1%)                                                     | 8780(39.7%)     | 2739(45.6%)                                                    | 2683(44.7%)    |
| Diabetes duration in yrs (sd)                            | 2.0(1.8)                                                        | 1.0(1.5)        | 1.9(1.7)                                                       | 1.9(1.8)       |
| Body Mass Index >30                                      | 4162(67.1%)                                                     | 10661(48.2%)    | 3994(66.5%)                                                    | 3978(66.2%)    |
| Number of hospitalizations in year prior to cohort entry |                                                                 |                 |                                                                |                |
| 0                                                        | 5647(91%)                                                       | 18516(83.7%)    | 5452(90.7%)                                                    | 5470(91%)      |
| 1                                                        | 378(6.1%)                                                       | 2105(9.5%)      | 375(6.2%)                                                      | 379(6.3%)      |
| 2                                                        | 109(1.8%)                                                       | 784(3.5%)       | 109(1.8%)                                                      | 92(1.5%)       |
| 3+                                                       | 72(1.2%)                                                        | 723(3.3%)       | 72(1.2%)                                                       | 67(1.1%)       |
| Number of drugs in year prior to cohort entry            |                                                                 |                 |                                                                |                |
| 0-4                                                      | 721(11.6%)                                                      | 3098(14%)       | 703(11.7%)                                                     | 671(11.2%)     |
| 5-10                                                     | 3204(51.6%)                                                     | 10379(46.9%)    | 3081(51.3%)                                                    | 3119(51.9%)    |
| 11+                                                      | 2281(36.8%)                                                     | 8651(39.1%)     | 2224(37%)                                                      | 2218(36.9%)    |
| HbA1c                                                    |                                                                 |                 |                                                                |                |
| <6.5%                                                    | 242(3.9%)                                                       | 1393(6.3%)      | 238(4%)                                                        | 233(3.9%)      |
| 6.5-7.5%                                                 | 1104(17.8%)                                                     | 3349(15.1%)     | 1049(17.5%)                                                    | 1053(17.5%)    |
| 7.5-9%                                                   | 2831(45.6%)                                                     | 7121(32.2%)     | 2701(45%)                                                      | 2694(44.8%)    |
| 9%+                                                      | 2000(32.2%)                                                     | 9833(44.4%)     | 1991(33.1%)                                                    | 2007(33.4%)    |
| Unknown                                                  | 29(<1%)                                                         | 432(2%)         | 29(<1%)                                                        | 21(<1%)        |
| eGFR <60                                                 | 883(14.2%)                                                      | 4429(20%)       | 857(14.3%)                                                     | 890(14.8%)     |
| Diagnoses in year prior to cohort entry                  |                                                                 |                 |                                                                |                |
| Heart Failure                                            | 68(1.1%)                                                        | 369(1.7%)       | 68(1.1%)                                                       | 51(<1%)        |
| Hypertension                                             | 1095(17.6%)                                                     | 4475(20.2%)     | 1066(17.7%)                                                    | 1087(18.1%)    |
| Dyslipidemia                                             | 213(3.4%)                                                       | 1093(4.9%)      | 213(3.5%)                                                      | 212(3.5%)      |
| Ischemic heart                                           | 174(2.8%)                                                       | 1033(4.7%)      | 171(2.8%)                                                      | 168(2.8%)      |
| Peripheral vascular                                      | 25(<1%)                                                         | 145(<1%)        | 25(<1%)                                                        | 24(<1%)        |
| Prescription drug use in year prior to cohort entry      |                                                                 |                 |                                                                |                |
| Metformin                                                | 5775(93.1%)                                                     | 16534(74.7%)    | 5578(92.8%)                                                    | 5638(93.8%)    |
| Acarbose                                                 | S                                                               | 8(<1%)          | S                                                              | S              |
| SGLT2 inhibitors                                         | 38(<1%)                                                         | 93(<1%)         | 38(<1%)                                                        | 40(<1%)        |
| Meglitinide                                              | 47(<1%)                                                         | 39(<1%)         | 38(<1%)                                                        | 29(<1%)        |
| Thiazolidinedione                                        | 252(4.1%)                                                       | 403(1.8%)       | 222(3.7%)                                                      | 209(3.5%)      |
| Insulin                                                  | 82(1.3%)                                                        | 331(1.5%)       | 80(1.3%)                                                       | 86(1.4%)       |
| Hypnotic                                                 | 332(5.3%)                                                       | 1486(6.7%)      | 328(5.5%)                                                      | 324(5.4%)      |
| Mood                                                     | 85(1.4%)                                                        | 280(1.3%)       | 81(1.3%)                                                       | 83(1.4%)       |
| Anticonvulsant                                           | 271(4.4%)                                                       | 832(3.8%)       | 260(4.3%)                                                      | 266(4.4%)      |
| Antipsychotics                                           | 176(2.8%)                                                       | 829(3.7%)       | 172(2.9%)                                                      | 171(2.8%)      |

S = suppressed due to low number of events

**Table 2. Measures of frequency and association for depression or self-harm in new-users of DPP-4 Inhibitors (DPP4i) or new-users of GLP-1 receptor agonists (GLP1ra) vs. sulfonylureas (SU), thiazolidinediones (TZD), or insulin.**

|                                         | DPP4 Inhibitor New User Cohort |                 | GLP1 Receptor Agonist New User Cohort |                 |
|-----------------------------------------|--------------------------------|-----------------|---------------------------------------|-----------------|
| <b>COMPARATOR: SU</b>                   |                                |                 |                                       |                 |
|                                         | <b>DPP4i</b>                   | <b>SU</b>       | <b>GLP1ra</b>                         | <b>SU</b>       |
| Number of patients                      | 6206                           | 22128           | 501                                   | 16409           |
| Person-years of follow-up               | 5589                           | 18596           | 549                                   | 13418           |
| Number of Events                        | 46                             | 218             | 10                                    | 183             |
| Incidence per 1000 person-years (95%CI) | 8.2(6.2-11)                    | 11.7(10.3-13.4) | 18.2(10-33.5)                         | 13.6(11.8-15.8) |
| Crude HR                                | 0.70(0.51-0.96)                | -ref-           | 1.36(0.72-2.58)                       | -ref-           |
| Adjusted HR                             | 0.80(0.57-1.13)                | -ref-           | 1.25(0.63-2.50)                       | -ref-           |
| <b>COMPARATOR: TZD</b>                  |                                |                 |                                       |                 |
|                                         | <b>DPP4i</b>                   | <b>TZD</b>      | <b>GLP1ra</b>                         | <b>TZD</b>      |
| Number of patients                      | 9565                           | 2512            | 851                                   | 2011            |
| Person-years of follow-up               | 9190                           | 2786            | 1035                                  | 2165            |
| Number of Events                        | 92                             | 30              | 17                                    | 27              |
| Incidence per 1000 person-years (95%CI) | 10.0(8.2-12.3)                 | 10.8(7.6-15.4)  | 16.4(10.3-26.3)                       | 12.5(8.6-18.1)  |
| Crude HR                                | 0.90(0.59-1.36)                | -ref-           | 1.32(0.72-2.42)                       | -ref-           |
| Adjusted HR                             | 1.17(0.70-1.96)                | -ref-           | 1.18(0.53-2.65)                       | -ref-           |
| <b>COMPARATOR: INSULIN</b>              |                                |                 |                                       |                 |
|                                         | <b>DPP4i</b>                   | <b>Insulin</b>  | <b>GLP1ra</b>                         | <b>Insulin</b>  |
| Number of patients                      | 10049                          | 3600            | 854                                   | 2745            |
| Person-years of follow-up               | 9878                           | 1161            | 1033                                  | 919             |
| Number of Events                        | 97                             | 24              | 14                                    | 19              |
| Incidence per 1000 person-years (95%CI) | 9.8(8.1-12)                    | 20.7(13.9-30.8) | 13.6(8.1-22.7)                        | 20.7(13.3-32.3) |
| Crude HR                                | 0.54(0.34-0.87)                | -ref-           | 0.74(0.35-1.56)                       | -ref-           |
| Adjusted HR                             | 0.98(0.53-1.83)                | -ref-           | 1.07(0.39-2.94)                       | -ref-           |

**Table 3. Patient Characteristics of New-user GLP-1 Receptor Agonist Cohort Before and After Propensity Score Matching.**

|                                                          | GLP-1 Receptor Agonist New User Cohort Before Propensity Score Matching |              | GLP-1 Receptor Agonist New User Cohort After Propensity Score Matching |            |
|----------------------------------------------------------|-------------------------------------------------------------------------|--------------|------------------------------------------------------------------------|------------|
|                                                          | GLP-1RA (n=501)                                                         | SU (n=16409) | GLP-1RA (n=488)                                                        | SU (n=488) |
| Age in yrs (sd)                                          | 49.4(11.3)                                                              | 57.8(12.9)   | 49.7(11.2)                                                             | 49.2(12.6) |
| Female                                                   | 204(40.7%)                                                              | 6021(36.7%)  | 198(40.6%)                                                             | 174(35.7%) |
| Measure of                                               |                                                                         |              |                                                                        |            |
| Least                                                    | 40(8%)                                                                  | 1688(10.3%)  | 40(8.2%)                                                               | 29(5.9%)   |
| Most                                                     | 56(11.2%)                                                               | 1770(10.8%)  | 56(11.5%)                                                              | 52(10.7%)  |
| Unknown                                                  | 240(47.9%)                                                              | 6784(41.3%)  | 230(47.1%)                                                             | 214(43.9%) |
| Diabetes duration in yrs (sd)                            | 1.7(1.6)                                                                | 1.2(1.6)     | 1.7(1.6)                                                               | 1.7(1.8)   |
| Body Mass Index>30                                       | 470(93.8%)                                                              | 10481(63.9%) | 458(93.9%)                                                             | 452(92.6%) |
| Number of hospitalizations in year prior to cohort entry |                                                                         |              |                                                                        |            |
| 0                                                        | 456(91%)                                                                | 14170(86.4%) | 445(91.2%)                                                             | 437(89.5%) |
| 1                                                        | 29(5.8%)                                                                | 1344(8.2%)   | 28(5.7%)                                                               | 27(5.5%)   |
| 2                                                        | 10(2%)                                                                  | 499(3%)      | 9(1.8%)                                                                | 17(3.5%)   |
| 3+                                                       | 6(1.2%)                                                                 | 396(2.4%)    | 6(1.2%)                                                                | 7(1.4%)    |
| Number of drugs in year prior to cohort entry            |                                                                         |              |                                                                        |            |
| 0-4                                                      | 17(3.4%)                                                                | 1660(10.1%)  | 17(3.5%)                                                               | 18(3.7%)   |
| 5-10                                                     | 195(38.9%)                                                              | 7899(48.1%)  | 192(39.3%)                                                             | 208(42.6%) |
| 11+                                                      | 289(57.7%)                                                              | 6850(41.7%)  | 279(57.2%)                                                             | 262(53.7%) |
| HbA1c                                                    |                                                                         |              |                                                                        |            |
| <6.5%                                                    | 66(13.2%)                                                               | 1085(6.6%)   | 62(12.7%)                                                              | 66(13.5%)  |
| 6.5-7.5%                                                 | 99(19.8%)                                                               | 2593(15.8%)  | 97(19.9%)                                                              | 99(20.3%)  |
| 7.5-9%                                                   | 150(29.9%)                                                              | 5357(32.6%)  | 145(29.7%)                                                             | 134(27.5%) |
| 9%+                                                      | 179(35.7%)                                                              | 7068(43.1%)  | 177(36.3%)                                                             | 178(36.5%) |
| Unknown                                                  | 7(1.4%)                                                                 | 306(1.9%)    | 7(1.4%)                                                                | 11(2.3%)   |
| eGFR <60                                                 | 36(7.2%)                                                                | 2821(17.2%)  | 35(7.2%)                                                               | 40(8.2%)   |
| Diagnoses in year prior to cohort entry                  |                                                                         |              |                                                                        |            |
| Heart Failure                                            | 5(1%)                                                                   | 244(1.5%)    | 5(1%)                                                                  | 6(1.2%)    |
| Hypertension                                             | 107(21.4%)                                                              | 3398(20.7%)  | 106(21.7%)                                                             | 104(21.3%) |
| Dyslipidemia                                             | 16(3.2%)                                                                | 771(4.7%)    | 16(3.3%)                                                               | 23(4.7%)   |
| Ischemic heart                                           | 11(2.2%)                                                                | 644(3.9%)    | 11(2.3%)                                                               | 9(1.8%)    |
| Peripheral                                               | S                                                                       | 106(<1%)     | S                                                                      | S          |
| Prescription drug use in year prior to cohort entry      |                                                                         |              |                                                                        |            |
| Metformin                                                | 457(91.2%)                                                              | 13542(82.5%) | 445(91.2%)                                                             | 449(92%)   |
| Acarbose                                                 | 2(<1%)                                                                  | 7(<1%)       | 1(<1%)                                                                 | 1(<1%)     |
| SGLT2 inhibitors                                         | 5(1%)                                                                   | 87(<1%)      | 5(1%)                                                                  | 5(1%)      |
| Meglitinide                                              | 11(2.2%)                                                                | 39(<1%)      | 10(2%)                                                                 | 10(2%)     |
| Thiazolidinedione                                        | 38(7.6%)                                                                | 376(2.3%)    | 38(7.8%)                                                               | 41(8.4%)   |
| Insulin                                                  | 65(13%)                                                                 | 307(1.9%)    | 55(11.3%)                                                              | 59(12.1%)  |
| Hypnotic                                                 | 32(6.4%)                                                                | 1093(6.7%)   | 32(6.6%)                                                               | 35(7.2%)   |
| Mood                                                     | 10(2%)                                                                  | 228(1.4%)    | 10(2%)                                                                 | 8(1.6%)    |
| Anticonvulsant                                           | 33(6.6%)                                                                | 682(4.2%)    | 31(6.4%)                                                               | 32(6.6%)   |
| Antipsychotics                                           | 12(2.4%)                                                                | 507(3.1%)    | <b>12(2.5%)</b>                                                        | 12(2.5%)   |

S = suppressed due to low number of events

## FIGURES

**Figure 1. Flow Diagram to Identify Initiators of DPP-4 Inhibitors and Sulfonylureas (DPP-4 Inhibitor Cohort), and GLP-1 Receptor Agonists and Sulfonylureas (GLP-1 Receptor Agonist Cohort)**

**Figure 1. Hazard Ratios and Number of Events within DPP-4 Inhibitor (DPP4i) and Sulfonylurea (SU) Users Across Sensitivity Analysis**

**Figure 3. Hazard Ratios and Number of Events within GLP-1 Receptor Agonist (GLP1ra) and Sulfonylurea (SU) Users Across Sensitivity Analysis**



Flow Diagram to Identify Initiators of DPP-4 Inhibitors and Sulfonylureas (DPP-4 Inhibitor Cohort), and GLP-1 Receptor Agonists and Sulfonylureas (GLP-1 Receptor Agonist Cohort)

177x181mm (300 x 300 DPI)



Hazard Ratios and Number of Events within DPP-4 Inhibitor (DPP4i) and Sulfonylurea (SU) Users Across Sensitivity Analysis

peer review only



1  
2  
3  
4  
5  
6  
7  
8  
9  
10  
11  
12  
13  
14  
15  
16  
17  
18  
19  
20  
21  
22  
23  
24  
25  
26  
27  
28  
29  
30  
31  
32  
33  
34  
35  
36  
37  
38  
39  
40  
41  
42  
43  
44  
45  
46  
47  
48  
49  
50  
51  
52  
53  
54  
55  
56  
57  
58  
59  
60



Hazard Ratios and Number of Events within GLP-1 Receptor Agonist (GLP1ra) and Sulfonylurea (SU) Users Across Sensitivity Analysis

peer review only

## Supplementary Material

## Appendix A: READ and ICD-10 Codes Used to Identify Depression

| READ Code      | Description                                                                              |
|----------------|------------------------------------------------------------------------------------------|
| <b>3004a</b>   | Depression                                                                               |
| <b>E2b..00</b> | Depressive Disorder Nec                                                                  |
| <b>E204.00</b> | Neurotic Depression Reactive Type                                                        |
| <b>1b17.00</b> | Depressed                                                                                |
| <b>Eu32z11</b> | [X]Depression Nos                                                                        |
| <b>3004am</b>  | Mood Depressed                                                                           |
| <b>3004er</b>  | Reactive Depression                                                                      |
| <b>1b17.11</b> | C/O - Feeling Depressed                                                                  |
| <b>3004l</b>   | Looking Depressed                                                                        |
| <b>E112.14</b> | Endogenous Depression                                                                    |
| <b>E112.11</b> | Agitated Depression                                                                      |
| <b>2960ad</b>  | Depression Agitated                                                                      |
| <b>E204.11</b> | Postnatal Depression                                                                     |
| <b>E135.00</b> | Agitated Depression                                                                      |
|                |                                                                                          |
| ICD-10 Code    | Definition                                                                               |
| <b>F20.4</b>   | post-schizophrenic depression                                                            |
| <b>F31.3</b>   | Bipolar affective disorder, current episode mild or moderate depression                  |
| <b>F31.4</b>   | Bipolar affective disorder, current episode severe depression without psychotic symptoms |
| <b>F31.5</b>   | Bipolar affective disorder, current episode severe depression with psychotic symptoms    |
| <b>F31.6</b>   | Bipolar affective disorder, current episode mixed                                        |
| <b>F32.0</b>   | Mild depressive episode                                                                  |
| <b>F32.1</b>   | Moderate depressive episode                                                              |
| <b>F32.2</b>   | Severe depressive episode without psychotic symptoms                                     |
| <b>F32.3</b>   | Severe depressive episode with psychotic symptoms                                        |
| <b>F32.4</b>   | Depressive disorder, single episode in partial remission                                 |
| <b>F32.5</b>   | Depressive disorder, single episode in full remission                                    |
| <b>F32.8</b>   | Other depressive episodes                                                                |
| <b>F32.9</b>   | Depressive episode, unspecified                                                          |
| <b>F33.0</b>   | Recurrent depressive disorder, current episode                                           |

|              |                                                                                  |
|--------------|----------------------------------------------------------------------------------|
|              | mild                                                                             |
| <b>F33.1</b> | Recurrent depressive disorder, current episode moderate                          |
| <b>F33.2</b> | Recurrent depressive disorder, current episode severe without psychotic symptoms |
| <b>F33.3</b> | Recurrent depressive disorder, current episode severe with psychotic symptoms    |
| <b>F33.8</b> | Other recurrent depressive disorders                                             |
| <b>F33.9</b> | Recurrent depressive disorder, unspecified                                       |
| <b>F34.1</b> | Dysthymia                                                                        |
| <b>F34.8</b> | Other persistent mood [affective] disorders                                      |
| <b>F34.9</b> | Persistent mood [affective] disorder, unspecified                                |
| <b>F38.0</b> | Other single mood [affective] disorders                                          |
| <b>F38.1</b> | Other recurrent mood [affective] disorders                                       |
| <b>F38.8</b> | Other specified mood [affective] disorders                                       |
| <b>F39</b>   | Unspecified mood [affective] disorder                                            |
| <b>F41.2</b> | Mixed anxiety and depressive disorder                                            |
| <b>F99</b>   | Mental disorder, not elsewhere specified                                         |

#### Appendix B: READ and ICD-10 Codes Used to Identify Self-harm

| READ Code      | Description                                                     |
|----------------|-----------------------------------------------------------------|
| <b>SL..14</b>  | Overdose of biological substance                                |
| <b>SL..15</b>  | Overdose of drug                                                |
| <b>SLHz.00</b> | Drug and medicament poisoning not otherwise specified           |
| <b>TK..00</b>  | Suicide and self-inflicted injury                               |
| <b>TK..11</b>  | Cause of overdose "deliberate                                   |
| <b>TK..12</b>  | Injury "self-inflicted                                          |
| <b>TK..13</b>  | Poisoning "self-inflicted                                       |
| <b>TK..14</b>  | Suicide and self-harm                                           |
| <b>TK..15</b>  | Attempted suicide                                               |
| <b>TK..17</b>  | Para-suicide                                                    |
| <b>TK0.00</b>  | Suicide + self-inflicted poisoning by solid/liquid substances   |
| <b>TK00.00</b> | Suicide + self-inflicted poisoning by analgesic/antipyretic     |
| <b>TK01.00</b> | Suicide + self-inflicted poisoning by barbiturates              |
| <b>TK01000</b> | Suicide and self-inflicted injury by amylobarbitone             |
| <b>TK01100</b> | Suicide and self-inflicted injury by barbitone                  |
| <b>TK01400</b> | Suicide and self-inflicted injury by phenobarbitone             |
| <b>TK02.00</b> | Suicide + self-inflicted poisoning by other sedatives/hypnotics |
| <b>TK03.00</b> | Suicide + self-inflicted poisoning tranquilizer/psychotropic    |
| <b>TK04.00</b> | Suicide + self-inflicted poisoning by other drugs/medicines     |

|    |                |                                                                                      |
|----|----------------|--------------------------------------------------------------------------------------|
| 1  | <b>TK05.00</b> | Suicide + self-inflicted poisoning by drug or medicine not otherwise specified       |
| 2  | <b>TK06.00</b> | Suicide + self-inflicted poisoning by agricultural chemical                          |
| 3  | <b>TK07.00</b> | Suicide + self-inflicted poisoning by corrosive/caustic substance                    |
| 4  | <b>TK0z.00</b> | Suicide + self-inflicted poisoning by solid/liquid substance not otherwise specified |
| 5  |                |                                                                                      |
| 6  |                |                                                                                      |
| 7  | <b>TK1.00</b>  | Suicide + self-inflicted poisoning by gases in domestic use                          |
| 8  | <b>TK10.00</b> | Suicide + self-inflicted poisoning by gas via pipeline                               |
| 9  |                |                                                                                      |
| 10 | <b>TK11.00</b> | Suicide + self-inflicted poisoning by liquified petrol gas                           |
| 11 | <b>TK1y.00</b> | Suicide and self-inflicted poisoning by other utility gas                            |
| 12 | <b>TK1z.00</b> | Suicide + self-inflicted poisoning by domestic gases not otherwise specified         |
| 13 |                |                                                                                      |
| 14 | <b>TK2.00</b>  | Suicide + self-inflicted poisoning by other gases and vapours                        |
| 15 | <b>TK20.00</b> | Suicide + self-inflicted poisoning by motor vehicle exhaust gas                      |
| 16 | <b>TK21.00</b> | Suicide and self-inflicted poisoning by other carbon monoxide                        |
| 17 |                |                                                                                      |
| 18 | <b>TK2z.00</b> | Suicide + self-inflicted poisoning by gases and vapours not otherwise specified      |
| 19 | <b>TK3.00</b>  | Suicide + self-inflicted injury by hang/strangulate/suffocate                        |
| 20 |                |                                                                                      |
| 21 | <b>TK30.00</b> | Suicide and self-inflicted injury by hanging                                         |
| 22 | <b>TK31.00</b> | Suicide + self-inflicted injury by suffocation by plastic bag                        |
| 23 | <b>TK3y.00</b> | Suicide + self-inflicted injury by other means than hang/strangle/suffocate          |
| 24 | <b>TK3z.00</b> | Suicide + self-inflicted injury by hang/strangle/suffocate not otherwise specified   |
| 25 |                |                                                                                      |
| 26 |                |                                                                                      |
| 27 | <b>TK4.00</b>  | Suicide and self-inflicted injury by drowning                                        |
| 28 |                |                                                                                      |
| 29 | <b>TK5.00</b>  | Suicide and self-inflicted injury by firearms and explosives                         |
| 30 | <b>TK51.00</b> | Suicide and self-inflicted injury by shotgun                                         |
| 31 | <b>TK52.00</b> | Suicide and self-inflicted injury by hunting rifle                                   |
| 32 | <b>TK54.00</b> | Suicide and self-inflicted injury by other firearm                                   |
| 33 | <b>TK5z.00</b> | Suicide and self-inflicted injury by firearms/explosives not otherwise specified     |
| 34 |                |                                                                                      |
| 35 | <b>TK6.00</b>  | Suicide and self-inflicted injury by cutting and stabbing                            |
| 36 |                |                                                                                      |
| 37 | <b>TK60.00</b> | Suicide and self-inflicted injury by cutting                                         |
| 38 | <b>TK60100</b> | Self-inflicted lacerations to wrist                                                  |
| 39 | <b>TK60111</b> | Slashed wrists self-inflicted                                                        |
| 40 |                |                                                                                      |
| 41 | <b>TK61.00</b> | Suicide and self-inflicted injury by stabbing                                        |
| 42 | <b>TK6z.00</b> | Suicide and self-inflicted injury by cutting and stabbing not otherwise specified    |
| 43 |                |                                                                                      |
| 44 | <b>TK7.00</b>  | Suicide and self-inflicted injury by jumping from high place                         |
| 45 | <b>TK70.00</b> | Suicide + self-inflicted injury " jump from residential premises                     |
| 46 | <b>TK71.00</b> | Suicide + self-inflicted injury " jump from other manmade structure                  |
| 47 | <b>TK72.00</b> | Suicide + self-inflicted injury " jump from natural sites                            |
| 48 | <b>TK7z.00</b> | Suicide + self-inflicted injury " jump from high place not otherwise specified       |
| 49 |                |                                                                                      |
| 50 | <b>TKx.00</b>  | Suicide and self-inflicted injury by other means                                     |
| 51 | <b>TKx0.00</b> | Suicide + self-inflicted injury " jump/lie before moving object                      |
| 52 | <b>TKx0000</b> | Suicide + self-inflicted injury " jumping before moving object                       |
| 53 | <b>TKx1.00</b> | Suicide and self-inflicted injury by burns or fire                                   |
| 54 | <b>TKx2.00</b> | Suicide and self-inflicted injury by scald                                           |
| 55 | <b>TKx3.00</b> | Suicide and self-inflicted injury by extremes of cold                                |
| 56 |                |                                                                                      |
| 57 |                |                                                                                      |
| 58 |                |                                                                                      |
| 59 |                |                                                                                      |

|    |                |                                                                               |
|----|----------------|-------------------------------------------------------------------------------|
| 1  | <b>TKx4.00</b> | Suicide and self-inflicted injury by electrocution                            |
| 2  | <b>TKx5.00</b> | Suicide and self-inflicted injury by crashing motor vehicle                   |
| 3  | <b>TKx6.00</b> | Suicide and self-inflicted injury by crashing of aircraft                     |
| 4  | <b>TKx7.00</b> | Suicide and self-inflicted injury caustic substance                           |
| 5  | <b>TKxy.00</b> | Suicide and self-inflicted injury by other specified means                    |
| 6  | <b>TKxz.00</b> | Suicide and self-inflicted injury by other means not otherwise specified      |
| 7  | <b>TKy.00</b>  | Late effects of self-inflicted injury                                         |
| 8  | <b>TKz.00</b>  | Suicide and self-inflicted injury not otherwise specified                     |
| 9  | <b>U2..00</b>  | [X]Intentional self-harm                                                      |
| 10 | <b>U2..11</b>  | [X]Self-inflicted injury                                                      |
| 11 | <b>U2..12</b>  | [X]Injury " self-inflicted                                                    |
| 12 | <b>U2..13</b>  | [X]Suicide                                                                    |
| 13 | <b>U2..14</b>  | [X]Attempted suicide                                                          |
| 14 | <b>U2..15</b>  | [X]Para-suicide                                                               |
| 15 | <b>U20.00</b>  | [X]Intentional self-poisoning/exposure to noxious substances                  |
| 16 | <b>U20.11</b>  | [X]Deliberate drug overdose/other poisoning                                   |
| 17 | <b>U200.00</b> | [X]Intentional self-poisoning/exposure to non-opioid analgesic                |
| 18 | <b>U200.11</b> | [X]Overdose " paracetamol                                                     |
| 19 | <b>U200.12</b> | [X]Overdose " ibuprofen                                                       |
| 20 | <b>U200.13</b> | [X]Overdose " aspirin                                                         |
| 21 | <b>U200000</b> | [X]Intentional self-poisoning/exposure to non-opioid analgesic at home        |
| 22 | <b>U200100</b> | [X]Intentional self-poisoning non-opioid analgesic at residential institution |
| 23 | <b>U200400</b> | [X]Intentional self-poisoning non-opioid analgesic in street/highway          |
| 24 | <b>U200500</b> | [X]Intentional self-poisoning non-opioid analgesic trade/service area         |
| 25 | <b>U200y00</b> | [X]Intentional self-poisoning non-opioid analgesic other specified place      |
| 26 | <b>U200z00</b> | [X]Intentional self-poisoning non-opioid analgesic unspecified place          |
| 27 | <b>U201.00</b> | [X]Intentional self-poisoning/exposure to antiepileptic                       |
| 28 | <b>U201000</b> | [X]Intentional self-poisoning/exposure to antiepileptic at home               |
| 29 | <b>U201z00</b> | [X]Intentional self-poisoning antiepileptic unspecified place                 |
| 30 | <b>U202.00</b> | [X]Intentional self-poisoning/exposure to sedative hypnotic                   |
| 31 | <b>U202.11</b> | [X]Overdose " sleeping tablets                                                |
| 32 | <b>U202.12</b> | [X]Overdose " diazepam                                                        |
| 33 | <b>U202.13</b> | [X]Overdose " temazepam                                                       |
| 34 | <b>U202.15</b> | [X]Overdose " nitrazepam                                                      |
| 35 | <b>U202.16</b> | [X]Overdose " benzodiazepine                                                  |
| 36 | <b>U202.17</b> | [X]Overdose " barbiturate                                                     |
| 37 | <b>U202.18</b> | [X]Overdose " amobarbital                                                     |
| 38 | <b>U202000</b> | [X]Intentional self-poisoning /exposure to sedative hypnotic at home          |
| 39 | <b>U202400</b> | [X]Intentional self-poisoning sedative hypnotic in street/highway             |
| 40 | <b>U202y00</b> | [X]Intentional self-poisoning sedative hypnotic other specified place         |
| 41 | <b>U202z00</b> | [X]Intentional self-poisoning sedative hypnotic unspecified place             |
| 42 | <b>U204.00</b> | [X]Intentional self-poisoning/exposure to psychotropic drug                   |
| 43 | <b>U204.11</b> | [X]Overdose " antidepressant                                                  |

|    |                |                                                                                                      |
|----|----------------|------------------------------------------------------------------------------------------------------|
| 1  | <b>U204.12</b> | [X]Overdose " amitriptyline                                                                          |
| 2  | <b>U204.13</b> | [X]Overdose " SSRI                                                                                   |
| 3  | <b>U204000</b> | [X]Intentional self-poisoning /exposure to psychotropic drug at home                                 |
| 4  | <b>U204100</b> | [X]Intentional self-poisoning psychotropic drug at residential institution                           |
| 5  | <b>U204y00</b> | [X]Intentional self-poisoning psychotropic drug other specified place                                |
| 6  | <b>U204z00</b> | [X]Intentional self-poisoning psychotropic drug unspecified place                                    |
| 7  | <b>U205000</b> | [X]Intentional self-poisoning/exposure to narcotic drug at home                                      |
| 8  | <b>U205y00</b> | [X]Intentional self-poisoning narcotic drug other specified place                                    |
| 9  | <b>U205z00</b> | [X]Intentional self-poisoning narcotic drug unspecified place                                        |
| 10 | <b>U206.00</b> | [X]Intentional self-poisoning/exposure to hallucinogen                                               |
| 11 | <b>U206400</b> | [X]Intentional self-poisoning hallucinogen in street/highway                                         |
| 12 | <b>U207.00</b> | [X]Intentional self-poisoning/exposure to other autonomic drug                                       |
| 13 | <b>U207000</b> | [X]Intentional self-poisoning/exposure to other autonomic drug at home                               |
| 14 | <b>U207z00</b> | [X]Intentional self-poisoning other autonomic drug unspecified place                                 |
| 15 | <b>U208.00</b> | [X]Intentional self-poisoning/exposure to other/unspecified drug/ medicament                         |
| 16 | <b>U208400</b> | [X]Intentional self-poisoning other/unspecified drug/medication in street/highway                    |
| 17 | <b>U208y00</b> | [X]Intentional self-poisoning other/unspecified drug/medication other specified place                |
| 18 | <b>U208z00</b> | [X]Intentional self-poisoning other/unspecified drug/medication unspecified place                    |
| 19 | <b>U20A.00</b> | [X]Intentional self-poisoning organic solvent                                                        |
| 20 | <b>U20A.11</b> | [X]Self-poisoning from glue solvent                                                                  |
| 21 | <b>U20A000</b> | "[X]Intentional self-poisoning organic solvent                                                       |
| 22 | <b>U20A400</b> | "[X]Intentional self-poisoning organic solvent                                                       |
| 23 | <b>U20Az00</b> | "[X]Intentional self-poisoning organic solvent                                                       |
| 24 | <b>U20B.00</b> | [X]Intentional self-poisoning/exposure to other gas/vapour U20B.11 [X]Self carbon monoxide poisoning |
| 25 | <b>U20B000</b> | [X]Intentional self-poisoning/exposure to other gas/vapour at home                                   |
| 26 | <b>U20B200</b> | [X]Intentional self-poisoning other gas/vapour school/public admin area                              |
| 27 | <b>U20By00</b> | [X]Intentional self-poisoning other gas/vapour other specified place                                 |
| 28 | <b>U20Bz00</b> | [X]Intentional self-poisoning other gas/vapour unspecified place                                     |
| 29 | <b>U20C.00</b> | [X]Intentional self-poisoning/exposure to pesticide                                                  |
| 30 | <b>U20C.11</b> | [X]Self-poisoning with weedkiller                                                                    |
| 31 | <b>U20C.12</b> | [X]Self-poisoning with paraquat                                                                      |
| 32 | <b>U20C000</b> | [X]Intentional self-poisoning/exposure to pesticide at home                                          |
| 33 | <b>U20Cy00</b> | [X]Intentional self-poisoning pesticide other specified place                                        |
| 34 | <b>U20y.00</b> | [X]Intentional self-poisoning/exposure to unspecified chemical                                       |
| 35 | <b>U20y000</b> | [X]Intentional self-poisoning/exposure to unspecified chemical at home                               |
| 36 | <b>U20y200</b> | [X]Intentional self-poisoning unspecified chemical school/public admin area                          |
| 37 | <b>U20yz00</b> | [X]Intentional self-poisoning unspecified chemical unspecified place                                 |
| 38 | <b>U21.00</b>  | [X]Intentional self-harm by hanging/strangulation/suffocation                                        |
| 39 | <b>U210.00</b> | [X]Intentional self-harm by hanging/strangulation/suffocation at home                                |

|                |                                                                                                          |
|----------------|----------------------------------------------------------------------------------------------------------|
| <b>U211.00</b> | [X]Intentional self-harm by hanging/strangulation/suffocation occurrence at residential institution      |
| <b>U21y.00</b> | [X]Intentional self-harm by hanging/strangulation/suffocation other specified place                      |
| <b>U21z.00</b> | [X]Intentional self-harm by hanging/strangulation/suffocation unspecified place                          |
| <b>U22.00</b>  | [X]Intentional self-harm by drowning and submersion                                                      |
| <b>U221.0</b>  | [X]Intentional self-harm by drowning/submersion occurrence at residential institution                    |
| <b>U22y.00</b> | [X]Intentional self-harm by drowning/submersion occurrence at other specified place                      |
| <b>U22z.00</b> | [X]Intentional self-harm by drowning/submersion occurrence at unspecified place                          |
| <b>U24.00</b>  | [X]Intentional self-harm by rifle shotgun/larger firearm discharge                                       |
| <b>U241.00</b> | [X]Intentional self-harm by rifle shotgun/larger firearm discharge occurrence at residential institution |
| <b>U242.00</b> | [X]Intentional self-harm by rifle shotgun/larger firearm discharge in school/public admin area           |
| <b>U25.00</b>  | [X]Intentional self-harm by other/unspecified firearm discharge                                          |
| <b>U250.00</b> | [X]Intentional self-harm other/unspecif firearm discharge occurrence at home                             |
| <b>U26.00</b>  | [X]Intentional self-harm by explosive material                                                           |
| <b>U27.00</b>  | [X]Intentional self-harm by smoke                                                                        |
| <b>U270.00</b> | [X]Intentional self-harm by smoke fire/flames occurrence at home                                         |
| <b>U274.00</b> | [X]Intentional self-harm by smoke fire/flame occurrence in street/highway                                |
| <b>U27z.00</b> | [X]Intentional self-harm by smoke fire/flames occurrence in unspecified place                            |
| <b>U28.00</b>  | [X]Intentional self-harm by steam hot vapours/hot objects                                                |
| <b>U280.00</b> | [X]Intentional self-harm by steam hot vapours/hot objects occurrence at home                             |
| <b>U28z.00</b> | [X]Intentional self-harm by steam hot vapours/hot objects occurrence in unspecified place                |
| <b>U29.00</b>  | [X]Intentional self-harm by sharp object                                                                 |
| <b>U290.00</b> | [X]Intentional self-harm by sharp object occurrence at home                                              |
| <b>U291.00</b> | [X]Intentional self-harm by sharp object occurrence at residential institution                           |
| <b>U294.00</b> | [X]Intentional self-harm by sharp object occurrence in street/highway                                    |
| <b>U29y.00</b> | [X]Intentional self-harm by sharp object occurrence at other specified place                             |
| <b>U29z.00</b> | [X]Intentional self-harm by sharp object occurrence at unspecified place                                 |
| <b>U2A.00</b>  | [X]Intentional self-harm by blunt object                                                                 |
| <b>U2A0.00</b> | [X]Intentional self-harm by blunt object occurrence at home                                              |
| <b>U2A1.00</b> | [X]Intentional self-harm by blunt object occurrence at residential institution                           |
| <b>U2A3.00</b> | [X]Intentional self-harm by blunt object occurrence at sports/athletic area                              |
| <b>U2B.00</b>  | [X]Intentional self-harm by jumping from a high place                                                    |
| <b>U2B0.00</b> | [X]Intentional self-harm by jumping from high place occurrence at home                                   |
| <b>U2B4.00</b> | [X]Intentional self-harm by jumping from high place occurring in street/highway                          |
| <b>U2B6.00</b> | [X]Intentional self-harm by jumping from high place industrial/construction area                         |



|                |                                                                                                        |
|----------------|--------------------------------------------------------------------------------------------------------|
| <b>U2By.00</b> | [X]Intentional self-harm by jumping from high place occurrence other specified place                   |
| <b>U2Bz.0</b>  | 0                                                                                                      |
| <b>U2C.00</b>  | [X]Intentional self-harm by jumping/lying before moving object                                         |
| <b>U2C1.00</b> | [X]Intentional self-harm by jumping/lying before moving object occurrence at residential institution   |
| <b>U2C4.00</b> | [X]Intentional self-harm by jumping/lying before moving object occurrence in street/highway            |
| <b>U2Cy.00</b> | [X]Intentional self-harm by jumping/lying before moving object occurrence other specified place        |
| <b>U2D.00</b>  | [X]Intentional self-harm by crashing of motor vehicle                                                  |
| <b>U2D0.00</b> | [X]Intentional self-harm by crashing of motor vehicle occurrence at home                               |
| <b>U2D4.00</b> | [X]Intentional self-harm by crashing of motor vehicle occurrence in street/highway                     |
| <b>U2D6.00</b> | [X]Intentional self-harm by crashing of motor vehicle occurrence industrial/construction area          |
| <b>U2E.00</b>  | <b>[X]Self-mutilation</b>                                                                              |
| <b>U2y.00</b>  | [X]Intentional self-harm by other specified means                                                      |
| <b>U2y0.00</b> | [X]Intentional self-harm by other specified means occurrence at home                                   |
| <b>U2y1.00</b> | [X]Intentional self-harm by other specified means occurrence at residential institution                |
| <b>U2yz.00</b> | [X]Intentional self-harm by other specif means occurrence at unspecified place                         |
| <b>U2z.00</b>  | [X]Intentional self-harm by unspecified means                                                          |
| <b>U2z0.00</b> | [X]Intentional self-harm by unspecified means occurrence at home                                       |
| <b>U2z2.00</b> | [X]Intentional self-harm by unspecified means occurrence school/institution/public administrative area |
| <b>U2zy.00</b> | [X]Intentional self-harm by unspecified means occurrence other specified place                         |
| <b>U2zz.00</b> | [X]Intentional self-harm by unspecified means occurrence at unspecified place                          |
| <b>U30.11</b>  | [X]Deliberate drug poisoning                                                                           |
| <b>U41.00</b>  | [X]Hanging strangulation + suffocation undetermined intent                                             |
| <b>U44.00</b>  | [X]Rifle shotgun + larger firearm discharge undetermined intent                                        |
| <b>U45.00</b>  | [X]Other + unspecified firearm discharge undetermined intent                                           |
| <b>U4B.00</b>  | [X]Falling jumping/pushed from high place undetermine intent                                           |
| <b>U4Bz.00</b> | [X]Fall jump/push from high place undetermine intent occurring at unspecified place                    |
| <b>U72.00</b>  | [X]Sequelae of intentional self-harm assault + event of undetermined intent                            |
| <b>U720.00</b> | [X]Sequelae of intentional self-harm                                                                   |
| <b>ZRLfc12</b> | Health of the Nation Outcome Scales item 2 “ nonaccidental self-injury                                 |
| <b>ZX..00</b>  | Self-harm                                                                                              |
| <b>ZX..11</b>  | Self-damage                                                                                            |
| <b>ZX1.00</b>  | Self-injurious behaviour                                                                               |
| <b>ZX1.12</b>  | SIB “ self-injurious behaviour                                                                         |
| <b>ZX1.13</b>  | Deliberate self-harm                                                                                   |
| <b>ZX11.00</b> | Biting self                                                                                            |

|    |                   |                                                                                                                                                   |
|----|-------------------|---------------------------------------------------------------------------------------------------------------------------------------------------|
| 1  | <b>ZX11.11</b>    | Bites self                                                                                                                                        |
| 2  | <b>ZX12.00</b>    | Burning self                                                                                                                                      |
| 3  | <b>ZX13.00</b>    | Cutting self                                                                                                                                      |
| 4  | <b>ZX13.11</b>    | Cuts self                                                                                                                                         |
| 5  | <b>ZX15.00</b>    | Drowning self                                                                                                                                     |
| 6  | <b>ZX18.00</b>    | Hanging self                                                                                                                                      |
| 7  | <b>ZX19.00</b>    | Hitting self                                                                                                                                      |
| 8  | <b>ZX19100</b>    | Punching self                                                                                                                                     |
| 9  | <b>ZX19200</b>    | Slapping self                                                                                                                                     |
| 10 | <b>ZX1B.00</b>    | Jumping from height                                                                                                                               |
| 11 | <b>ZX1B100</b>    | Jumping from building                                                                                                                             |
| 12 | <b>ZX1B200</b>    | Jumping from bridge                                                                                                                               |
| 13 | <b>ZX1B300</b>    | Jumping from cliff                                                                                                                                |
| 14 | <b>ZX1C.00</b>    | Nipping self                                                                                                                                      |
| 15 | <b>ZX1E.00</b>    | Pinching self                                                                                                                                     |
| 16 | <b>ZX1G.00</b>    | Scratches self                                                                                                                                    |
| 17 | <b>ZX1H.00</b>    | Self-asphyxiation                                                                                                                                 |
| 18 | <b>ZX1H100</b>    | Self-strangulation                                                                                                                                |
| 19 | <b>ZX1H200</b>    | Self-suffocation                                                                                                                                  |
| 20 | <b>ZX1I.00</b>    | Self-scalding                                                                                                                                     |
| 21 | <b>ZX1J.00</b>    | Self-electrocution                                                                                                                                |
| 22 | <b>ZX1K.00</b>    | Self-incineration                                                                                                                                 |
| 23 | <b>ZX1K.11</b>    | Setting fire to self                                                                                                                              |
| 24 | <b>ZX1K.12</b>    | Setting self alight                                                                                                                               |
| 25 | <b>ZX1L.00</b>    | Self-mutilation                                                                                                                                   |
| 26 | <b>ZX1L100</b>    | Self-mutilation of hands                                                                                                                          |
| 27 | <b>ZX1L200</b>    | Self-mutilation of genitalia                                                                                                                      |
| 28 | <b>ZX1L300</b>    | Self-mutilation of penis                                                                                                                          |
| 29 | <b>ZX1L600</b>    | Self-mutilation of ears                                                                                                                           |
| 30 | <b>ZX1LD00</b>    | [X]Self mutilation                                                                                                                                |
| 31 | <b>ZX1M.00</b>    | Shooting self                                                                                                                                     |
| 32 | <b>ZX1N.00</b>    | Stabbing self                                                                                                                                     |
| 33 | <b>ZX1Q.00</b>    | Throwing self in front of train                                                                                                                   |
| 34 | <b>ZX1Q.11</b>    | Jumping under train                                                                                                                               |
| 35 | <b>ZX1R.00</b>    | Throwing self in front of vehicle                                                                                                                 |
| 36 | <b>ZX1S.00</b>    | Throwing self onto floor                                                                                                                          |
| 37 |                   |                                                                                                                                                   |
| 38 |                   |                                                                                                                                                   |
| 39 |                   |                                                                                                                                                   |
| 40 |                   |                                                                                                                                                   |
| 41 |                   |                                                                                                                                                   |
| 42 |                   |                                                                                                                                                   |
| 43 |                   |                                                                                                                                                   |
| 44 |                   |                                                                                                                                                   |
| 45 |                   |                                                                                                                                                   |
| 46 |                   |                                                                                                                                                   |
| 47 |                   |                                                                                                                                                   |
| 48 |                   |                                                                                                                                                   |
| 49 |                   |                                                                                                                                                   |
| 50 |                   |                                                                                                                                                   |
| 51 | <b>ICD-10code</b> | <b>Description</b>                                                                                                                                |
| 52 | <b>X60</b>        | Intentional self-poisoning by and exposure to nonopioid analgesics, antipyretics and antirheumatics                                               |
| 53 | <b>X61</b>        | Intentional self-poisoning by and exposure to antiepileptic, sedative-hypnotic, antiparkinsonism and psychotropic drugs, not elsewhere classified |
| 54 | <b>X62</b>        | Intentional self-poisoning by and exposure to narcotics and psychodysleptics                                                                      |

|            |                                                                                                                                                       |
|------------|-------------------------------------------------------------------------------------------------------------------------------------------------------|
|            | [hallucinogens], not elsewhere classified                                                                                                             |
| <b>X63</b> | Intentional self-poisoning by and exposure to other drugs acting on the autonomic nervous system                                                      |
| <b>X64</b> | Intentional self-poisoning by and exposure to other and unspecified drugs, medicaments and biological substances                                      |
| <b>X65</b> | Intentional self-poisoning by and exposure to alcohol                                                                                                 |
| <b>X66</b> | Intentional self-poisoning by and exposure to organic solvents and halogenated hydrocarbons and their vapours                                         |
| <b>X67</b> | Intentional self-poisoning by and exposure to other gases and vapours                                                                                 |
| <b>X68</b> | Intentional self-poisoning by and exposure to pesticides                                                                                              |
| <b>X69</b> | Intentional self-poisoning by and exposure to other and unspecified chemicals and noxious substances                                                  |
| <b>X70</b> | Intentional self-harm by hanging, strangulation and suffocation                                                                                       |
| <b>X71</b> | Intentional self-harm by drowning and submersion                                                                                                      |
| <b>X72</b> | Intentional self-harm by handgun discharge                                                                                                            |
| <b>X73</b> | Intentional self-harm by rifle, shotgun and larger firearm discharge                                                                                  |
| <b>X74</b> | Intentional self-harm by other and unspecified firearm discharge                                                                                      |
| <b>X75</b> | Intentional self-harm by explosive material                                                                                                           |
| <b>X76</b> | Intentional self-harm by smoke, fire and flames                                                                                                       |
| <b>X77</b> | Intentional self-harm by steam, hot vapours and hot objects                                                                                           |
| <b>X78</b> | Intentional self-harm by sharp object                                                                                                                 |
| <b>X79</b> | Intentional self-harm by blunt object                                                                                                                 |
| <b>X80</b> | Intentional self-harm by jumping from a high place                                                                                                    |
| <b>X81</b> | Intentional self-harm by jumping or lying before moving object                                                                                        |
| <b>X82</b> | Intentional self-harm by crashing of motor vehicle                                                                                                    |
| <b>X83</b> | Intentional self-harm by other specified means                                                                                                        |
| <b>X84</b> | Intentional self-harm by unspecified means                                                                                                            |
| <b>Y10</b> | Poisoning by and exposure to nonopioid analgesics, antipyretics and antirheumatics, undetermined intent                                               |
| <b>Y11</b> | Poisoning by and exposure to antiepileptic, sedative-hypnotic, antiparkinsonism and psychotropic drugs, not elsewhere classified, undetermined intent |
| <b>Y12</b> | Poisoning by and exposure to narcotics and psychodysleptics [hallucinogens], not elsewhere classified, undetermined intent                            |
| <b>Y13</b> | Poisoning by and exposure to other drugs acting on the autonomic nervous system, undetermined intent                                                  |
| <b>Y14</b> | Poisoning by and exposure to other and unspecified drugs, medicaments and biological substances, undetermined intent                                  |
| <b>Y15</b> | Poisoning by and exposure to alcohol, undetermined intent                                                                                             |
| <b>Y16</b> | Poisoning by and exposure to organic solvents and halogenated hydrocarbons and their vapours, undetermined intent                                     |
| <b>Y17</b> | Poisoning by and exposure to other gases and vapours, undetermined intent                                                                             |
| <b>Y18</b> | Poisoning by and exposure to pesticides, undetermined intent                                                                                          |
| <b>Y19</b> | Poisoning by and exposure to other and unspecified chemicals and noxious substances, undetermined intent                                              |
| <b>Y20</b> | Hanging, strangulation and suffocation, undetermined intent                                                                                           |

|    |            |                                                                             |
|----|------------|-----------------------------------------------------------------------------|
| 1  | <b>Y21</b> | Drowning and submersion, undetermined intent                                |
| 2  | <b>Y22</b> | Handgun discharge, undetermined intent                                      |
| 3  | <b>Y23</b> | Rifle, shotgun and larger firearm discharge, undetermined intent            |
| 4  | <b>Y24</b> | Other and unspecified firearm discharge, undetermined intent                |
| 5  | <b>Y25</b> | Contact with explosive material, undetermined intent                        |
| 6  | <b>Y26</b> | Exposure to smoke, fire and flames, undetermined intent                     |
| 7  | <b>Y27</b> | Contact with steam, hot vapours and hot objects, undetermined intent        |
| 8  | <b>Y28</b> | Contact with sharp object, undetermined intent                              |
| 9  | <b>Y29</b> | Contact with blunt object, undetermined intent                              |
| 10 | <b>Y30</b> | Falling, jumping or pushed from a high place, undetermined intent           |
| 11 | <b>Y31</b> | Falling, lying or running before or into moving object, undetermined intent |
| 12 | <b>Y32</b> | Crashing of motor vehicle, undetermined intent                              |
| 13 | <b>Y33</b> | Other specified events, undetermined intent                                 |
| 14 | <b>Y34</b> | Unspecified event, undetermined intent                                      |

### Appendix C. Covariates Forced into the High Density Propensity Score

|    |                                                                                                                                          |
|----|------------------------------------------------------------------------------------------------------------------------------------------|
| 23 | <b>All covariates assessed in the 365 days prior to study index date</b>                                                                 |
| 24 | Age at index date                                                                                                                        |
| 25 | Alcohol Abuse [Never, Former, Current, Unknown]                                                                                          |
| 26 | BMI                                                                                                                                      |
| 27 | Duration of treated diabetes [time between first oral antidiabetic drug and study index date]                                            |
| 28 | History of:                                                                                                                              |
| 29 | Cirrhosis                                                                                                                                |
| 30 | Congestive heart failure                                                                                                                 |
| 31 | Hypertension                                                                                                                             |
| 32 | Hyperlipidemia                                                                                                                           |
| 33 | Ischemic heart disease                                                                                                                   |
| 34 | Peripheral heart disease                                                                                                                 |
| 35 | Number of hospitalizations                                                                                                               |
| 36 | Most recent HbA1c value to index date                                                                                                    |
| 37 | Number of distinct prescription drugs                                                                                                    |
| 38 | Prior use of benzodiazepines or other hypnotics, antipsychotics, levothyroxine or triiodothyronine, anticonvulsants, or mood stabilizers |
| 39 | Sex                                                                                                                                      |
| 40 | Smoking status [Never, Former, Current, Unknown]                                                                                         |
| 41 | Socioeconomic status [quintiles of Index of Multiple Deprivation]                                                                        |
| 42 | Use of other antidiabetic agents                                                                                                         |
| 43 | Year of cohort entry                                                                                                                     |

**Appendix D. Measures of frequency and association for depression among DPP-4 inhibitor and GLP-1 receptor agonist cohorts**

|                                             | DPP4i               | SU                  | GLP1ra              | SU                  |
|---------------------------------------------|---------------------|---------------------|---------------------|---------------------|
| Number of patients                          | 6207                | 22218               | 502                 | 16728               |
| Person-years follow-up                      | 5591                | 18683               | 549                 | 13628               |
| Number of events                            | 45                  | 215                 | 10                  | 182                 |
| Incidence per 1000 person-years<br>(95% CI) | 8.0<br>(6.0-10.8)   | 11.5<br>(10.1-13.2) | 18.2<br>(10-33.5)   | 13.4<br>(11.6-15.4) |
| Crude Hazard Ratio<br>(95% CI)              | 0.70<br>(0.50-0.96) | -ref-               | 1.39<br>(0.74-2.63) | -ref-               |
| Adjusted Hazard Ratio<br>(95% CI)           | 0.81<br>(0.57-1.14) | -ref-               | 1.22<br>(0.61-2.42) | -ref-               |

**S = suppressed due to low number of events**

**Appendix E. Measures of frequency and association for self-harm among DPP-4 inhibitor and GLP-1 receptor agonist cohorts**

|                                             | DPP4i               | SU               | GLP1ra | SU    |
|---------------------------------------------|---------------------|------------------|--------|-------|
| Number of patients                          | 6211                | 22180            | 502    | 16632 |
| Person-years follow-up                      | 5632                | 18839            | 563    | 13696 |
| Number of events                            | S                   | 5                | S      | S     |
| Incidence per 1000 person-years<br>(95% CI) | S                   | 0.3<br>(0.1-0.6) | S      | S     |
| Crude Hazard Ratio<br>(95% CI)              | 0.66<br>(0.08-5.69) | -ref-            | S      | -ref- |
| Adjusted Hazard Ratio<br>(95% CI)           | 0.77<br>(0.07-8.21) | -ref-            | S      | -ref- |

**S = suppressed due to low number of events**

**Appendix F. Measures of frequency and association for depression or self-harm among DPP-4 inhibitor and GLP-1 receptor agonist cohorts when patients are matched 1:1 by propensity score.**

|                                             | DPP4i               | SU                 | GLP1ra              | SU                 |
|---------------------------------------------|---------------------|--------------------|---------------------|--------------------|
| Number of patients                          | 6008                | 6008               | 488                 | 488                |
| Person-years follow-up                      | 548                 | 4488               | 529                 | 349                |
| Number of events                            | 44                  | 49                 | 10                  | 7                  |
| Incidence per 1000 person-years<br>(95% CI) | 8.0<br>(6-10.8)     | 10.9<br>(8.3-14.4) | 18.9<br>(10.4-34.8) | 20.1<br>(9.9-41.3) |
| Crude Hazard Ratio<br>(95% CI)              | 0.75<br>(0.50-1.13) | -ref-              | 0.99<br>(0.37-2.61) | -ref-              |
| Adjusted Hazard Ratio<br>(95% CI)           | 0.77<br>(0.51-1.16) | -ref-              | 0.98<br>(0.36-2.61) | -ref-              |

**Appendix G. Measures of frequency and association for depression or self-harm among DPP-4 inhibitor and GLP-1 receptor agonist cohorts when patients are adjusted for pattern of glucose-lowering therapy.**

|                                            | DPP4i               | SU                 | GLP1RA              | SU                  |
|--------------------------------------------|---------------------|--------------------|---------------------|---------------------|
| Number of patients                         | 4416                | 15943              | 117                 | 4165                |
| Person-years follow-up                     | 3743                | 12614              | 90                  | 3327                |
| Number of events                           | 36                  | 140                | S                   | 61                  |
| Incidence per 1000 person-years<br>(95%CI) | 9.6<br>(7-13.3)     | 11.1<br>(9.4-13.1) | 33.4<br>(12.1-97.5) | 18.3<br>(14.3-23.6) |
| Crude Hazard Ratio<br>(95% CI)             | 0.86<br>(0.60-1.24) | -ref-              | 1.82<br>(0.57-5.80) | -ref-               |
| Adjusted Hazard Ratio<br>(95% CI)          | 1.00<br>(0.66-1.49) | -ref-              | 1.55<br>(0.46-5.18) | -ref-               |

**S = suppressed due to low number of events**

**Appendix H. Measures of frequency and association for depression or self-harm among DPP-4 inhibitor and GLP-1 receptor agonist cohorts when patients are restricted to only those with HES/ONS linked data.**

|                                            | DPP4i               | SU                  | GLP1ra              | SU                |
|--------------------------------------------|---------------------|---------------------|---------------------|-------------------|
| Number of patients                         | 3348                | 13243               | 262                 | 9997              |
| Person-years follow-up                     | 2841                | 10762               | 290                 | 7904              |
| Number of events                           | 27                  | 132                 | S                   | 111               |
| Incidence per 1000 person-years<br>(95%CI) | 9.5<br>(6.5-13.8)   | 12.3<br>(10.3-14.5) | 13.8<br>(5.6-35.3)  | 14<br>(11.7-16.9) |
| Crude Hazard Ratio<br>(95% CI)             | 0.78<br>(0.51-1.17) | -ref-               | 1.00<br>(0.37-2.72) | -ref-             |
| Adjusted Hazard Ratio<br>(95% CI)          | 0.99<br>(0.63-1.55) | -ref-               | 0.93<br>(0.32-2.71) | -ref-             |

**Appendix I. Measures of frequency and association for depression or self-harm among DPP-4 inhibitor and GLP-1 receptor agonist cohorts when patients are restricted to second-line therapy after metformin monotherapy.**

|                                            | DPP4i               | SU                  | GLP1ra           | SU                |
|--------------------------------------------|---------------------|---------------------|------------------|-------------------|
| Number of patients                         | 1255                | 4612                | 65               | 2112              |
| Person-years follow-up                     | 1191                | 3601                | 47               | 1680              |
| Number of events                           | 11                  | 48                  | S                | 29                |
| Incidence per 1000 person-years<br>(95%CI) | 9.2<br>(5.2-16.5)   | 13.3<br>(10.1-17.7) | 43(13.3-155.3)   | 17.3<br>(12-24.8) |
| Crude Hazard Ratio<br>(95% CI)             | 0.71<br>(0.37-1.38) | -ref-               | 2.49(0.59-10.45) | -ref-             |
| Adjusted Hazard Ratio<br>(95% CI)          | 0.67<br>(0.34-1.34) | -ref-               | 1.92(0.44-8.31)  | -ref-             |

**S = suppressed due to low number of events**

**Appendix J. Measures of frequency and association for depression or self-harm among DPP-4 inhibitor and GLP-1 receptor agonist cohorts when BMI categories (in addition to hdps deciles) were added to the Cox proportional regression model.**

|                                            | DPP4i               | SU                  | GLP1ra              | SU                  |
|--------------------------------------------|---------------------|---------------------|---------------------|---------------------|
| Number of patients                         | 6206                | 22128               | 501                 | 16409               |
| Person-years follow-up                     | 5589                | 18596               | 549                 | 13418               |
| Number of events                           | 46                  | 218                 | 10                  | 183                 |
| Incidence per 1000 person-years<br>(95%CI) | 8.2<br>(6.2-11)     | 11.7<br>(10.3-13.4) | 18.2<br>(10-33.5)   | 13.6<br>(11.8-15.8) |
| Crude Hazard Ratio<br>(95% CI)             | 0.70<br>(0.51-0.96) | -ref-               | 1.36<br>(0.72-2.58) | -ref-               |
| Adjusted Hazard Ratio<br>(95% CI)          | 0.81<br>(0.58-1.15) | -ref-               | 1.25<br>(0.63-2.51) | -ref-               |

S = suppressed due to low number of events

**Appendix K. Time-dependent Cox regression for DPP-4 inhibitor monotherapy and combination therapies Vs. Sulfonylurea (SU) monotherapy**

| Exposure vs. SU monotherapy | Coef  | *Adjusted HR | Lower .95 | Upper .95 | Se (coef) | Pr (> z ) |
|-----------------------------|-------|--------------|-----------|-----------|-----------|-----------|
| DPP-4i monotherapy          | -0.07 | 0.93         | 0.65      | 1.32      | 0.18      | 0.69      |
| DPP-4i/SU                   | -0.53 | 0.59         | 0.34      | 1.02      | 0.28      | 0.06      |
| DPP-4i/Other                | -0.16 | 0.85         | 0.70      | 1.04      | 0.10      | 0.11      |
| DPP-4i/SU/Other             | -0.13 | 0.88         | 0.68      | 1.14      | 0.13      | 0.33      |

\*Adjusted for deciles of hdps

**Appendix L. Time-dependent Cox regression for GLP-1 receptor agonist (GLP1ra) monotherapy and combination therapies Vs. Sulfonylurea (SU) monotherapy**

| Exposure vs. SU monotherapy | Coef  | *Adjusted HR | Lower .95 | Upper .95 | Se (coef) | Pr (> z ) |
|-----------------------------|-------|--------------|-----------|-----------|-----------|-----------|
| GLP1ra monotherapy          | -0.51 | 0.60         | 0.30      | 1.21      | 0.36      | 0.15      |
| GLP1ra /SU                  | 0.45  | 1.57         | 0.78      | 3.18      | 0.36      | 0.21      |
| GLP1ra /Other               | 0.14  | 1.16         | 0.88      | 1.52      | 0.14      | 0.31      |
| GLP1ra /SU/Other            | -0.31 | 0.73         | 0.47      | 1.15      | 0.23      | 0.18      |

\*Adjusted for deciles of hdps



STROBE Statement—Checklist of items that should be included in reports of *cohort studies*

|                              | Item No | Recommendation                                                                                                                                                                                                                                                                                                                                                         |
|------------------------------|---------|------------------------------------------------------------------------------------------------------------------------------------------------------------------------------------------------------------------------------------------------------------------------------------------------------------------------------------------------------------------------|
| <b>Title and abstract</b>    | 1       | (a) Indicate the study's design with a commonly used term in the title or the abstract<br><b>Cohort in title</b><br>(b) Provide in the abstract an informative and balanced summary of what was done and what was found<br><b>Structured abstract provided</b>                                                                                                         |
| <b>Introduction</b>          |         |                                                                                                                                                                                                                                                                                                                                                                        |
| Background/rationale         | 2       | Explain the scientific background and rationale for the investigation being reported<br><b>Introduction – paragraphs 1 and 2</b>                                                                                                                                                                                                                                       |
| Objectives                   | 3       | State specific objectives, including any prespecified hypotheses<br><b>Introduction – paragraph 3</b>                                                                                                                                                                                                                                                                  |
| <b>Methods</b>               |         |                                                                                                                                                                                                                                                                                                                                                                        |
| Study design                 | 4       | Present key elements of study design early in the paper<br><b>Methods, Study Design and Data Sources section, paragraph 1</b>                                                                                                                                                                                                                                          |
| Setting                      | 5       | Describe the setting, locations, and relevant dates, including periods of recruitment, exposure, follow-up, and data collection<br><b>Methods, Study Design and Data Sources section, paragraph 1</b>                                                                                                                                                                  |
| Participants                 | 6       | (a) Give the eligibility criteria, and the sources and methods of selection of participants. Describe methods of follow-up<br><b>Methods, Study Cohort section, paragraph 1</b><br>(b) For matched studies, give matching criteria and number of exposed and unexposed                                                                                                 |
| Variables                    | 7       | Clearly define all outcomes, exposures, predictors, potential confounders, and effect modifiers. Give diagnostic criteria, if applicable<br><b>Methods, Exposure and Outcome Definitions section</b>                                                                                                                                                                   |
| Data sources/<br>measurement | 8*      | For each variable of interest, give sources of data and details of methods of assessment (measurement). Describe comparability of assessment methods if there is more than one group<br><b>Methods, Exposure and Outcome Definitions section</b><br><b>Supplemental appendix</b>                                                                                       |
| Bias                         | 9       | Describe any efforts to address potential sources of bias<br><b>Methods, Statistical Analysis section, paragraphs 2 and 3</b>                                                                                                                                                                                                                                          |
| Study size                   | 10      | Explain how the study size was arrived at<br><b>Figure 1</b>                                                                                                                                                                                                                                                                                                           |
| Quantitative variables       | 11      | Explain how quantitative variables were handled in the analyses. If applicable, describe which groupings were chosen and why<br><b>Methods, Exposure and Outcome Definitions section</b><br><b>Methods, Statistical Analysis section</b>                                                                                                                               |
| Statistical methods          | 12      | (a) Describe all statistical methods, including those used to control for confounding<br>(b) Describe any methods used to examine subgroups and interactions<br>(c) Explain how missing data were addressed<br>(d) If applicable, explain how loss to follow-up was addressed<br>(e) Describe any sensitivity analyses<br><b>Methods, Statistical Analysis section</b> |
| <b>Results</b>               |         |                                                                                                                                                                                                                                                                                                                                                                        |
| Participants                 | 13*     | (a) Report numbers of individuals at each stage of study—eg numbers potentially                                                                                                                                                                                                                                                                                        |

|                          |     |                                                                                                                                                                                                              |
|--------------------------|-----|--------------------------------------------------------------------------------------------------------------------------------------------------------------------------------------------------------------|
|                          |     | eligible, examined for eligibility, confirmed eligible, included in the study, completing follow-up, and analysed                                                                                            |
|                          |     | (b) Give reasons for non-participation at each stage                                                                                                                                                         |
|                          |     | (c) Consider use of a flow diagram                                                                                                                                                                           |
|                          |     | <b>Figure 1 is a flow diagram</b>                                                                                                                                                                            |
| Descriptive data         | 14* | (a) Give characteristics of study participants (eg demographic, clinical, social) and information on exposures and potential confounders                                                                     |
|                          |     | (b) Indicate number of participants with missing data for each variable of interest                                                                                                                          |
|                          |     | (c) Summarise follow-up time (eg, average and total amount)                                                                                                                                                  |
|                          |     | <b>Table 3</b>                                                                                                                                                                                               |
|                          |     | <b>Results section</b>                                                                                                                                                                                       |
| Outcome data             | 15* | Report numbers of outcome events or summary measures over time                                                                                                                                               |
|                          |     | <b>Table 3</b>                                                                                                                                                                                               |
|                          |     | <b>Results section</b>                                                                                                                                                                                       |
|                          |     | <b>Supplemental appendix</b>                                                                                                                                                                                 |
| Main results             | 16  | (a) Give unadjusted estimates and, if applicable, confounder-adjusted estimates and their precision (eg, 95% confidence interval). Make clear which confounders were adjusted for and why they were included |
|                          |     | (b) Report category boundaries when continuous variables were categorized                                                                                                                                    |
|                          |     | (c) If relevant, consider translating estimates of relative risk into absolute risk for a meaningful time period                                                                                             |
|                          |     | <b>Results section</b>                                                                                                                                                                                       |
|                          |     | <b>Table 3</b>                                                                                                                                                                                               |
| Other analyses           | 17  | Report other analyses done—eg analyses of subgroups and interactions, and sensitivity analyses                                                                                                               |
|                          |     | <b>Results section, paragraph 5</b>                                                                                                                                                                          |
|                          |     | <b>Figure 2</b>                                                                                                                                                                                              |
|                          |     | <b>Figure 3</b>                                                                                                                                                                                              |
|                          |     | <b>Supplemental appendix</b>                                                                                                                                                                                 |
| <b>Discussion</b>        |     |                                                                                                                                                                                                              |
| Key results              | 18  | Summarise key results with reference to study objectives                                                                                                                                                     |
|                          |     | <b>Discussion section, paragraph 1</b>                                                                                                                                                                       |
| Limitations              | 19  | Discuss limitations of the study, taking into account sources of potential bias or imprecision. Discuss both direction and magnitude of any potential bias                                                   |
|                          |     | <b>Discussion section, paragraph 5</b>                                                                                                                                                                       |
| Interpretation           | 20  | Give a cautious overall interpretation of results considering objectives, limitations, multiplicity of analyses, results from similar studies, and other relevant evidence                                   |
|                          |     | <b>Discussion section, final paragraph</b>                                                                                                                                                                   |
| Generalisability         | 21  | Discuss the generalisability (external validity) of the study results                                                                                                                                        |
| <b>Other information</b> |     |                                                                                                                                                                                                              |
| Funding                  | 22  | Give the source of funding and the role of the funders for the present study and, if applicable, for the original study on which the present article is based                                                |
|                          |     | <b>Funding support</b>                                                                                                                                                                                       |

\*Give information separately for exposed and unexposed groups.

**Note:** An Explanation and Elaboration article discusses each checklist item and gives methodological background and published examples of transparent reporting. The STROBE checklist is best used in conjunction with this article (freely available on the Web sites of PLoS Medicine at <http://www.plosmedicine.org/>, Annals of Internal Medicine at

1 <http://www.annals.org/>, and Epidemiology at <http://www.epidem.com/>). Information on the STROBE Initiative is  
2 available at <http://www.strobe-statement.org>.  
3  
4  
5  
6  
7  
8  
9  
10  
11  
12  
13  
14  
15  
16  
17  
18  
19  
20  
21  
22  
23  
24  
25  
26  
27  
28  
29  
30  
31  
32  
33  
34  
35  
36  
37  
38  
39  
40  
41  
42  
43  
44  
45  
46  
47  
48  
49  
50  
51  
52  
53  
54  
55  
56  
57  
58  
59  
60

For peer review only

# BMJ Open

## Examining the Risk of Depression or Self-Harm Associated with Incretin-based Therapies Used to Manage Hyperglycemia in Patients with Type 2 Diabetes: A Cohort Study Using the UK Clinical Practice Research Datalink

|                                 |                                                                                                                                                                                                                                                                                                                                                                                                                                                                                                                                |
|---------------------------------|--------------------------------------------------------------------------------------------------------------------------------------------------------------------------------------------------------------------------------------------------------------------------------------------------------------------------------------------------------------------------------------------------------------------------------------------------------------------------------------------------------------------------------|
| Journal:                        | <i>BMJ Open</i>                                                                                                                                                                                                                                                                                                                                                                                                                                                                                                                |
| Manuscript ID                   | bmjopen-2018-023830.R2                                                                                                                                                                                                                                                                                                                                                                                                                                                                                                         |
| Article Type:                   | Research                                                                                                                                                                                                                                                                                                                                                                                                                                                                                                                       |
| Date Submitted by the Author:   | 27-Aug-2018                                                                                                                                                                                                                                                                                                                                                                                                                                                                                                                    |
| Complete List of Authors:       | Gamble, John Michael; University of Waterloo, School of Pharmacy; Memorial University of Newfoundland, School of Pharmacy<br>Chibrikov, Eugene; Memorial University of Newfoundland, School of Pharmacy and Faculty of Medicine; University of Waterloo, School of Pharmacy<br>Midodzi, William; Memorial University of Newfoundland, Faculty of Medicine<br>Twells, Laurie; Memorial University of Newfoundland, School of Pharmacy and Faculty of Medicine<br>Majumdar, Sumit; University of Alberta, Department of Medicine |
| <b>Primary Subject Heading</b>: | Diabetes and endocrinology                                                                                                                                                                                                                                                                                                                                                                                                                                                                                                     |
| Secondary Subject Heading:      | Pharmacology and therapeutics, Epidemiology                                                                                                                                                                                                                                                                                                                                                                                                                                                                                    |
| Keywords:                       | General diabetes < DIABETES & ENDOCRINOLOGY, EPIDEMIOLOGY, Depression & mood disorders < PSYCHIATRY, cohort study, pharmacoepidemiology                                                                                                                                                                                                                                                                                                                                                                                        |
|                                 |                                                                                                                                                                                                                                                                                                                                                                                                                                                                                                                                |

SCHOLARONE™  
Manuscripts

1  
2 **Examining the Risk of Depression or Self-Harm Associated with Incretin-based Therapies**  
3 **Used to Manage Hyperglycemia in Patients with Type 2 Diabetes: A Cohort Study Using the**  
4 **UK Clinical Practice Research Datalink**  
5

6  
7 John-Michael Gamble<sup>1,2</sup>, Eugene Chibrikov<sup>1,2,3</sup>, William K Midodzi<sup>3</sup>, Laurie K Twells<sup>2,3</sup>, Sumit R  
8 Majumdar<sup>† 4</sup>  
9

10  
11  
12 1. School of Pharmacy, Faculty of Science, University of Waterloo, Waterloo, Ontario, Canada

13  
14 2. School of Pharmacy, Memorial University of Newfoundland, St. John's, Newfoundland and  
15 Labrador, Canada

16  
17 3. Faculty of Medicine, Memorial University of Newfoundland, St. John's, Newfoundland and  
18 Labrador, Canada

19  
20 4. Division of General Internal Medicine, Department of Medicine, University of Alberta, Edmonton,  
21 Alberta, Canada  
22  
23  
24  
25

26 **Correspondence to:**

27 John-Michael Gamble

28 School of Pharmacy

29 University of Waterloo

30 10A Victoria Street South

31 Kitchener, ON, Canada N2G 2C5

32 Phone: (519) 888-4567, ext. 21343 Fax: (519) 883-7580

33 Email: [jm.gamble@uwaterloo.ca](mailto:jm.gamble@uwaterloo.ca)  
34  
35  
36  
37  
38  
39  
40  
41

42 **Abbreviated Title:** Depression and Self-Harm Among Incretin-based Therapy Users  
43

44  
45 Key terms: cohort study, type 2 diabetes, dipeptidyl-peptidase 4 inhibitors, glucagon-like receptor 1  
46 agonists, depression, suicide, self-harm  
47  
48

49 **Counts:** Abstract=290; Manuscript= 3079; Figures=3; Tables=3; References=45  
50  
51  
52  
53  
54  
55  
56  
57  
58

59 <sup>†</sup> Deceased January 19, 2018

## Abstract

**Objectives:** To compare population-based incidence rates of new-onset depression or self-harm in patients initiating incretin-based therapies with that of sulfonylureas (SU) and other glucose-lowering agents.

**Design:** Population-based cohort study

**Setting:** Patients attending primary care practices registered with the UK-based Clinical Practice Research Datalink (CPRD).

**Participants:** Using the UK-based Clinical Practice Research Datalink (CPRD), we identified two incretin-based therapies cohorts: (1) DPP-4i-cohort, consisting of new-users of DPP-4 inhibitors and sulfonylureas, and (2) GLP-1RA-cohort, consisting of new-users of GLP-1 receptor agonists and sulfonylureas, between Jan-2007 and Jan-2016. Patients with a prior history of depression, self-harm, and other serious psychiatric conditions were excluded.

**Main outcome measures:** The primary study outcome comprised a composite of new-onset depression or self-harm. Unadjusted and adjusted Cox proportional hazards regression was used to quantify the association between incretin-based therapies and depression or self-harm. Deciles of high-dimensional propensity scores and concurrent number of glucose-lowering agents were used to adjust for potential confounding.

**Results:** We identified new-users of 6206 DPP-4i and 22128 sulfonylureas in the DPP-4i-cohort, and 501 GLP-1RA and 16409 sulfonylurea new-users in the GLP-1RA-cohort. The incidence of depression or self-harm was 8.2 vs. 11.7 events/1000-person-years in the DPP-4i-cohort and 18.2 vs. 13.6 events/1000-person-years in the GLP-1RA-cohort for incretin-based therapies vs sulfonylureas, respectively. Incretin-based therapies were not associated with an increased or decreased incidence of depression or self-harm compared to sulfonylureas (DPP-4i-cohort: unadjusted hazard ratio (HR) 0.70, 95% confidence interval (CI): 0.51-0.96) adjusted HR 0.80, 95% CI: 0.57-1.13; GLP-1RA-cohort: unadjusted hazard ratio (HR) 1.36, 95% confidence interval (CI): 0.72-2.58; adjusted HR 1.25, 95% CI: 0.63-2.50). Consistent results were observed for other glucose-lowering comparators including insulin and thiazolidinediones.

**Conclusions:** Our findings suggest that the two incretin-based therapies are not associated with an increased or decreased risk of depression or self-harm.

### Strengths and limitations of the study

- This study used a new-user active comparator design with high dimensional propensity scores to control for confounding
- Depression is likely underestimated using diagnostic codes, although previous studies have shown positive predictive values around 90% or greater
- There were a limited number of self-harm events and the study was not powered to detect clinically relevant differences across exposure groups for this component of the composite outcome
- This study cannot rule out small or modest difference in risk of depression or self-harm between incretin-based therapy users and other glucose-lowering due to study power limitations

### Introduction

Patients with diabetes frequently have coexisting depression with a prevalence ranging from 12% to 27%.<sup>[1]</sup> Depression is not only associated with diabetes but with an increased risk of diabetes-related complications,<sup>[2]</sup> decreased quality of life,<sup>[3]</sup> and decreased life-expectancy.<sup>[4]</sup> Diabetes is also associated with new-onset depression; however, the temporal association between diabetes and depression remains unclear.<sup>[5,6]</sup> Moreover, diabetes is associated with an increased risk of intentional self-harm,<sup>[7,8]</sup> albeit there is significant heterogeneity between studies assessing the association between diabetes and suicide.<sup>[9]</sup> It has been postulated that certain glucose-lowering pharmacotherapies may have a positive influence on the symptoms of depression, although the evidence is sparse.<sup>[10–15]</sup> The incretin-based therapies in particular may have neuropsychiatric effects given the presence of glucagon-like peptide-1 (GLP-1) receptors in the central nervous system.<sup>[16,17]</sup>

Concerns surrounding central nervous system effects stem from a case report of exenatide-induced depression and from pooled adverse event data from pre-marketing clinical trials for sitagliptin.<sup>[18–20]</sup> Pooled event rates for the latter suggested a 4-fold increased risk of suicide ideation and completed suicide in sitagliptin users compared to non-users.<sup>[19,21]</sup> Animal models suggest adverse neuropsychiatric effects are biologically plausible given the expression of GLP-1 receptors in the brain.<sup>[20]</sup> Furthermore, studies have shown low dipeptidyl peptidase-4 (DPP-4) activity is correlated with depression.<sup>[22–24]</sup> Although the case-report mentioned above suggested a potential increased risk of



1  
2 depression, a recent study reported positive effects of GLP-1 receptor agonists on patients  
3 well-being.[25] Therefore alternations in DPP-4 enzymatic activity may modulate the  
4 pathophysiology of neuropsychiatric conditions such as major depression.  
5  
6

7  
8 Using data from a population-based cohort of patients with type 2 diabetes, we aimed  
9 to quantify the association between incretin-based therapies and the composite of new-onset  
10 depression and self-harm.  
11  
12  
13  
14  
15  
16  
17  
18  
19  
20  
21  
22  
23  
24  
25  
26  
27  
28  
29  
30  
31  
32  
33  
34  
35  
36  
37  
38  
39  
40  
41  
42  
43  
44  
45  
46  
47  
48  
49  
50  
51  
52  
53  
54  
55  
56  
57  
58  
59  
60

## Methods

### *Study Design and Data Sources*

We conducted a population-based cohort study using data from the Clinical Practice Research Datalink (CPRD), which captures electronic medical information for primary care encounters by general practitioners in the United Kingdom (UK).[26] The CPRD contains de-identified individual-level longitudinal data collected from a subset of primary care practices (~700) in the UK. The CPRD data is a representative sample that is similar to the overall UK population in age, sex, and ethnicity.[27] The database includes sociodemographic and lifestyle variables (e.g., alcohol consumption), physiological measures (e.g., blood pressure), laboratory testing (e.g., glycated hemoglobin [A1c]), physician-assigned diagnoses using the Read classification system, and prescription records from general practitioner records. Data quality checks are performed in accordance with standardized guidelines that certify practices as up-to-standard. Furthermore, over 350 validation studies have been performed using the CPRD.[28,29] Information on hospitalizations and causes of death are available for a subset of CPRD patients through linkages with the external databases. Details regarding the data quality, linkages, and utility are available elsewhere.[30] The CPRD has been used extensively to study associations between drugs and depression and self-harm.[31–35] Our study protocol was approved by the Independent Scientific Advisory Committee (ISAC 15\_016RARA, August 2017) and received approval from the Health Research Ethics Board at Memorial University.

### *Study Cohorts*

Our source population consisted of all patients over 18 years of age with a minimum of 12-months of up-to-standard medical history in the CPRD database that received a new diagnosis for type 2 diabetes or a new prescription for any glucose-lowering therapy between January 1, 2001 and the February 2016 CPRD dataset build. We used a 365-day washout period to define a new diagnosis or new glucose-lowering therapy use. A sub-cohort of patients (~58%) selected from the source population was linked to Hospital Episode Statistics (HES – follow-up until 31March2014), Office of National Statistics (ONS – follow-up until 30April2014), and index of multiple deprivation (IMD [2010]) data to capture hospital records, causes of death, and socioeconomic status information, respectively. Women with polycystic ovarian syndrome, gestational diabetes, or whom were pregnant during the study period were

1  
2 excluded. In addition, we excluded patients with a study entry date prior to January 1, 2007 as  
3 the first incretin-based therapies became available in the UK in early 2007.  
4  
5

6  
7 We identified two main study cohorts. Specifically, the first cohort consisted of new-  
8 users of DPP-4 inhibitors and new-users of sulfonylureas (DPP-4 inhibitor cohort) and the  
9 second cohort consisted of new-users of GLP-1 receptor agonists and new-users of  
10 sulfonylureas (GLP-1 receptor agonist cohort). Although new-users of sulfonylureas served as  
11 the reference population for both cohorts, these individuals were selected separately for each  
12 cohort as prior use of other non-incretin glucose-lowering agents was permitted. To minimize  
13 potential selection bias within the above cohorts, we excluded patients with a history of  
14 depression, self-harm, anxiety, and other serious psychiatric conditions in the year prior to a  
15 patient's cohort entry date.  
16  
17  
18  
19  
20  
21  
22  
23

### 24 ***Exposure and Outcome Definitions***

25  
26  
27 Within each incretin-based therapy cohort, we defined person-time exposure to all  
28 classes of glucose-lowering therapy including (1) DPP-4 inhibitors, (2) GLP-1 receptor  
29 agonists, (3) Sulfonylureas, (4) Metformin, (5) Thiazolidinediones, (6) Sodium glucose co-  
30 transporter-2 inhibitors, (7) Meglitinides, (8) Acarbose, (9) Insulin, and (10) no glucose-  
31 lowering drug therapy (i.e. diet/lifestyle). Patient's contributed person-time to each of the  
32 aforementioned categories on the day of their first prescription or date of diagnosis (defined  
33 as the patient's index date) until a patient discontinued the drug, left a CPRD practice, died, or  
34 on the final date of follow-up, whichever occurred first. To account for potential non-  
35 adherence, we included a portion of follow-up time following the end of the expected  
36 medication supply that was equivalent to 50% of the prescription duration as a period of  
37 exposure.  
38  
39  
40  
41  
42  
43  
44  
45

46 Our primary outcome the composite of either new-onset depression or self-harm,  
47 including suicide and suicidal ideation. If a patient experienced more than one event, the date  
48 of the first event was used. New-onset depression or episodes of self-harm were identified  
49 using diagnostic codes from either the CPRD, HES, or ONS data sources (specific codes  
50 available in supplemental material in Appendices A and B).  
51  
52  
53  
54  
55  
56  
57  
58  
59  
60

## **Statistical Analysis**

Unadjusted and adjusted Cox proportional hazards regression was used to quantify the association between incretin-based therapies and depression or self-harm. Our primary exposure contrasts of interest were DPP-4 inhibitors vs. sulfonylureas and GLP-1 receptor agonists vs. sulfonylureas within the DPP-4 inhibitor and GLP-1 receptor agonists cohorts respectively. Sulfonylureas were chosen a priori as the main reference group given their use in clinical practice as second or third agents resembles incretin-based therapies. Patients contributed follow-up time from the initiation of the incretin-based therapy of interest or comparator until they experienced the composite outcome of interest or were censored. Censoring occurred upon the earliest date of the following events: discontinuation of the incretin-based therapy of interest or comparator, switching between an incretin-based therapy to the comparator (or vice-versa), leaving a CPRD practice site, death, end of study period.

To adjust for potential confounders, we used a high-dimensional propensity score (hdPS) algorithm to select up to 40 empirical covariates.[36] Using a multivariable logistic regression model that included the both empirically derived and predefined (age, sex, alcohol abuse, body mass index, duration of treated diabetes, comorbidities, number of hospitalizations, HbA1c, prior medications use, smoking status, socioeconomic status [quintiles of the index of multiple deprivation], use of other glucose-lowering therapies, year of cohort entry. A detailed list of covariates forced into propensity score model is shown in Appendix C) covariates, we calculated the probability of initiating a DPP-4 inhibitor versus a sulfonylurea (or comparator for sensitivity analysis). Patients with overlapping propensity scores were included in the analysis. A separate hdPS procedure was run for the GLP-1 receptor agonist cohort. Adjusted hazard ratios and 95% confidence intervals were calculated using a Cox proportional hazards regression model with deciles of the hdPS and variable indicating the number of glucose-lowering agents during follow-up (1, 2, 3 or more). We used standard graphical approaches to assess model assumptions for which no violations were noted.

Secondary analyses included alternative comparator groups and components of composite outcome (i.e., depression and self-harm as separate outcomes). In addition, we conducted several additional sensitivity analyses. First, we used two alternative methods to adjust for potential confounding including a matched propensity score approach (1:1 -

1  
2 matching using greedy nearest neighbor approach with a caliper set at 0.2 times the standard  
3 deviation of the natural logarithm of the propensity score) and grouping patients with identical  
4 patterns of glucose-lowering therapies prior to and following cohort initiation. For the latter  
5 approach, an example of how we grouped patients is as follows. Patients who started with  
6 metformin monotherapy and added an incretin-based therapy would be grouped with patients  
7 who also started metformin monotherapy and then added the comparator drug of interest.  
8 Groups with less than 25 patients were excluded from this analysis. We used a categorical  
9 variable to adjust for all groups within our multivariable Cox proportional hazards model.  
10 Second, we ran several analyses using restricted cohorts including restricting our cohort to  
11 patients eligible for HES/ONS linkage (i.e., patients with hospital and death certificate  
12 records), restricting to monotherapy users, restricting to a cohort of metformin monotherapy  
13 users who added the incretin-based therapy of interest or a sulfonylurea. Third, we added  
14 BMI (as a categorical variable) to Cox proportional hazards model given that weight may be a  
15 confounding factor.[37,38] Fourth, we used time-dependent variables to classify our  
16 exposures of interest throughout follow-up time. All analyses were conducted with R version  
17 3.3.3.  
18  
19  
20  
21  
22  
23  
24  
25  
26  
27  
28  
29  
30

### 31 ***Patient and Public Involvement***

32 No patients were involved in any aspect of the study.  
33  
34  
35  
36

## 37 **Results**

### 38 *DPP-4 Inhibitor Cohort*

39 Within the DPP-4 inhibitor new user cohort, there were 6206 initiators of a DPP-4  
40 inhibitor and 22128 initiators of a sulfonylurea (Figure 1). The mean (standard deviation)  
41 follow-up time was 324 (362) days for DPP-4 inhibitor users and 299 (385) days for  
42 sulfonylurea users. Compared to sulfonylurea users, DPP-4 inhibitor users were on average  
43 younger, had fewer hospitalizations in the year prior to cohort entry, and less likely to have  
44 impaired kidney function. Patient characteristics were well-balanced following propensity  
45 score matching (Table 1). There were a total 264 patients identified with new-onset  
46 depression or self-harm.  
47  
48  
49  
50  
51  
52  
53

54 The incidence of depression or self-harm was 8.2 per 1000 person-years in DPP-4  
55 inhibitor users compared to 11.7 per 1000 person-years in sulfonylurea users (unadjusted  
56  
57  
58  
59  
60

1 hazard ratio (HR): 0.70 95% confidence interval (CI) 0.51-0.96 [table 2]). Similarly, the crude  
2 incidence rates were smaller for DPP-4 inhibitor users versus other comparators (10.0 vs.  
3 10.8 per 1000 person-years for TZDs; 9.8 vs. 20.7 for insulin users). However, following  
4 adjustment for potential confounding variables, there was no significant association between  
5 DPP-4 inhibitor use and the risk of depression or self-harm for all comparator groups  
6 (sulfonylurea comparator: adjusted HR 0.80, 95% CI 0.57-1.13; TZD comparator: adjusted  
7 HR 1.17, 95% CI 0.70-1.96; insulin comparator: adjusted HR 0.98, 95% CI 0.53-1.83).  
8 Appendices D and E show the results for the risks of depression and self-harm separately.  
9

### 10 *GLP-1 Receptor Agonist Cohort*

11 Within the GLP-1 receptor agonist cohort, there were 501 initiators of a GLP-1 receptor  
12 agonist and 16409 initiators of a sulfonylurea (Figure 1). The mean (standard deviation)  
13 follow-up time was 397 (409) days for GLP-1 receptor agonist users and 292 (373) days for  
14 sulfonylurea users. Compared to sulfonylurea users, GLP-1 receptor agonist users were on  
15 average younger, more likely female, used more drugs in the year prior to cohort entry, had a  
16 lower baseline HbA1c, more likely to have used several medications prior to cohort entry  
17 including insulin, SSRIs, or other antidepressant. Following propensity score matching,  
18 baseline patient characteristics were well-balanced (Table 3). There were a total 193 patients  
19 identified with new-onset depression or self-harm.  
20

21 The incidence rate of depression or self-harm was non-significantly higher for GLP-1  
22 receptor users compared to sulfonylurea users (18.2 vs. 13.6 per 1000 person-years;  
23 unadjusted HR 1.36, 95% CI 0.72-2.58; adjusted HR 1.25, 95% CI 0.63-2.50), TZDs (16.4 vs.  
24 12.5 per 1000 person-years; unadjusted HR 1.32, 95% CI 0.72-2.42; adjusted HR 1.18, 95%  
25 CI 0.53-2.65), and insulin users (13.6 vs. 20.7 per 1000 person-years; unadjusted HR 0.74,  
26 95% CI 0.35-1.56; adjusted HR 1.07, 95% CI 0.39-2.94). All measured associations remained  
27 non-significant following adjustment for potential confounders (Table 2). Appendix D shows  
28 the results for depression analyzed as a separate outcome. We were unable to analyze  
29 results for self-harm separately, due to small numbers of events (Appendix E).  
30

### 31 *Sensitivity Analyses*

32 Figures 2 and 3 provide the number of events per treatment exposure group and  
33 measures of association for selected sensitivity analyses across the main DPP-4 inhibitor and  
34

1  
2 GLP-1 receptor agonist cohorts. There were too few events to run a stable statistical model  
3 for all pre-specified sensitivity analyses (e.g. new monotherapy users); however, findings from  
4 models that were run were consistent with our main results suggesting that DPP-4 inhibitor  
5 use did not have an increased or decreased risk of new-onset depression (Appendix F to L).  
6  
7  
8  
9

## 10 11 12 **Discussion**

13  
14 New users of DPP-4 inhibitors and new users of GLP-1 receptor agonists did not have  
15 an increased or decreased risk of a new diagnosis of depression or episode of self-harm.  
16 These findings extend our current knowledge regarding the relative safety of the incretin-  
17 based therapies used to manage hyperglycemia in patients with type 2 diabetes.  
18  
19

20  
21 The impetus for our study was the safety signal generated by randomized controlled  
22 trials and a case-report suggesting that incretin-based therapies may affect the risk of  
23 depression or self-harm. Specifically, early trial data found a 4-times greater risk of suicidal  
24 ideation or completed suicide in sitagliptin users vs glipizide users.[19,21] A higher incidence  
25 of depression was also observed in the long-term safety population among phase-3 clinical  
26 trial in sitagliptin 100mg users (13/429) compared to placebo (0/154); however, the incidence  
27 of psychiatric events was no different among pooled phase 3 studies (3.0% in sitagliptin  
28 100mg users; 2.4% in sitagliptin 200mg users, and 3.2% in placebo users).[20] Moreover, a  
29 case-report has also been published regarding exenatide-induced depression.[18]  
30  
31

32  
33 Despite our findings suggesting a lack of association between incretin-based agents  
34 and depression or self-harm, there is a substantial evidence-base from animal models that  
35 suggest incretin-based therapies may affect mood disorders. Anderberg and colleagues found  
36 differential effects of acute versus chronic exposure to a GLP-1 receptor agonist.[39] Acute  
37 activation of GLP-1 receptors was associated with anxiogenic effects, whereas chronic GLP-1  
38 receptor activation did not elicit anxiogenic effects in Sprague-Dawley rats. In fact, chronic  
39 exposure to a GLP-1 receptor agonist was associated with a decrease in depressive-like  
40 behavior. Furthermore, acute stimulation of GLP-1 receptors affected serotonin turnover and  
41 serotonin receptor expression in the amygdala; however, chronic stimulation did not affect  
42 serotonin turnover or receptor expression. In addition to effects on serotonin, activation of  
43 GLP-1 may have mood effects through impacting central dopamine levels.[40] A mice model  
44 suggests that liraglutide, a GLP-1 receptor agonist, has antipsychotic properties possibly  
45  
46  
47  
48  
49  
50  
51  
52  
53  
54  
55  
56  
57  
58  
59  
60



1 through its affecting dopamine activity in the brain.[41] Interestingly, the DPP-4 inhibitor  
2 sitagliptin, did not exhibit the same antipsychotic properties.  
3

4  
5 Another possible mechanism by which glucose lowering therapies may affect mood  
6 disorders is through the reduction in inflammatory cytokines/mediators. Moulton et al reported  
7 improvement in depressive symptoms over 1-year in a cohort of 1735 newly diagnosed  
8 patients with type 2 diabetes.[10] The improvement in depressive symptoms measure by the  
9 PHQ-9 was independent of change in glycemic control and was correlated with a change in  
10 the inflammatory marker hs-CRP. Furthermore, a meta-analysis found that pioglitazone was  
11 associated with a reduction in symptoms of depression compared to placebo (pooled odds  
12 ratio = 3.3, 95% confidence interval 1.4 to 7.8).[11] A 12-week open-label study also found  
13 that pioglitazone was associated with a reduction in depression symptoms as well as a  
14 decrease in c-reactive protein and decreased insulin resistance.[12] Indeed, a population-  
15 based cross-sectional study found that numerous inflammatory markers (e.g., c-reactive  
16 protein, interleukin-1 receptor agonist, monocyte chemoattractant protein-1, white blood cell count,  
17 triglyceride) were associated with depression in patients with type 2 diabetes.[42] To further  
18 test this hypothesis among DPP-4 inhibitor users, there is an ongoing small clinical trial  
19 evaluating the effect of sitagliptin on symptoms of depression in the elderly (EudraCT  
20 Number: 2015-004527-32).[43]  
21  
22

23  
24 Our study is subject to the standard limitations of observational cohort studies including  
25 the potential for residual and unmeasured confounding. Although we adjusted for over 70  
26 potential confounders using an HdPS approach, we were not able to capture all relevant  
27 potential confounders such as severity of depressive symptoms and patient level  
28 socioeconomic status. Our follow-up time was also limited (DPP-4 cohort mean follow-up time  
29 = 305 days; GLP-1 receptor agonist cohort mean follow-up = 296 days), therefore, it is  
30 possible that a longer time frame was required to detect an association. However, it would be  
31 expected that an effect on depression symptoms mediated by serotonin or dopaminergic  
32 central pathways would be apparent after 4 to 6 weeks or sooner. There were a limited  
33 number of self-harm events and our study was not powered to detect clinically relevant  
34 differences across exposure groups for this component of our composite outcome. Similarly,  
35 given the lower and upper limits of the 95% confidence intervals, our study cannot rule out  
36 small or moderate differences in the risk of depression across exposure groups.  
37  
38 Misclassification of the exposure or outcome variables of interest may have also impacted our  
39  
40  
41  
42  
43  
44  
45  
46  
47  
48  
49  
50  
51  
52  
53  
54  
55  
56  
57  
58  
59  
60

1 findings. Our exposure variables of interest (incretin-based therapies) were measured based  
2 on primary care prescription records and therefore may overestimate true exposure due to  
3 primary and secondary non-adherence. In addition, prescriptions written by specialists are not  
4 captured in the CPRD. It is possible that when the incretin-based therapies were introduced  
5 they were more frequently prescribed by specialists and our study would miss the initial  
6 prescription, however, subsequent prescriptions written by general practitioners would be  
7 captured. Previous studies have shown that depression is likely underestimated using  
8 diagnostic codes, although positive predictive values have generally been greater than 90%  
9 using ICD-10 codes.[44] Under-ascertainment of depression would likely be non-differential  
10 between our exposure groups of interest and therefore bias our findings toward the null.  
11 Suicide and self-harm have also been shown to be underestimated using CPRD data and the  
12 use of linked mortality data via the Office of National Statistics improves the sensitivity for  
13 capturing suicide and self-harm; however, underreporting of events is still expected.[45] In  
14 addition, the role of incretin-based agents may have shifted over time whereby when they  
15 were first introduced to the market were not used commonly as 2<sup>nd</sup> line agents and  
16 sulfonylureas may have been used as first or second-line agents. We attempted to control for  
17 both temporal trends and timing of therapy by using calendar time, duration of and prior  
18 exposure of glucose-lowering therapies as covariates in the propensity score.  
19

20 Our findings provide some reassurance regarding the safety of the incretin-based  
21 therapies in the treatment of type 2 diabetes. Specifically, our study results suggest that there  
22 is not a clinically relevant association between either DPP-4 inhibitors or GLP-1 receptor  
23 agonists and depression or self-harm.  
24  
25  
26  
27  
28  
29  
30  
31  
32

1  
2 **Authors' Contributions:** JMG, EC, WKM, LKT and SRM, were involved in the concept and  
3 design of the study. JMG was responsible for drafting the first version of the manuscript. All  
4 authors contributed to the interpretation of data. JMG, EC, WKM, and LKT provided revisions  
5 to the manuscript. JMG will act as guarantor for the study.  
6  
7  
8  
9

10 **Acknowledgements:** JMG is supported as a New Investigator Award from the Canadian  
11 Institute of Health Research and a Clinician Scientist Award from Diabetes Canada. This  
12 study is based in part on data from the Clinical Practice Research Datalink obtained under  
13 licence from the UK Medicines and Healthcare products Regulatory Agency. However, the  
14 interpretation and conclusions contained in this study are those of the author/s alone.  
15  
16  
17  
18  
19

20 **Funding Support:** This work was supported by an operating grant from the Canadian  
21 Institute for Health Research (FRN173599 – 287647).  
22  
23  
24  
25

26 **Competing Interest:** All authors have completed the Unified Competing Interest form at  
27 [www.icmje.org/coi\\_disclosure.pdf](http://www.icmje.org/coi_disclosure.pdf) (available on request from the corresponding author) and  
28 declare no support from any organization for the submitted work; no financial relationships  
29 that may be relevant to the submitted work; and no other relationships or activities that could  
30 appear to have influence the submitted work.  
31  
32  
33  
34  
35

36 **Ethical approval:** This study was approved by the Independent Scientific Advisory  
37 Committee (ISAC 15\_016RARA) and received approval from the Health Research Ethics  
38 Board at Memorial University.  
39  
40  
41  
42

43 **Copyright:** The Corresponding Author has the right to grant on behalf of all authors and  
44 does grant on behalf of all authors, [a worldwide licence](#) to the Publishers and its licensees in  
45 perpetuity, in all forms, formats and media (whether known now or created in the future), to i)  
46 publish, reproduce, distribute, display and store the Contribution, ii) translate the Contribution  
47 into other languages, create adaptations, reprints, include within collections and create  
48 summaries, extracts and/or, abstracts of the Contribution, iii) create any other derivative  
49 work(s) based on the Contribution, iv) to exploit all subsidiary rights in the Contribution, v) the  
50 inclusion of electronic links from the Contribution to third party material where-ever it may be  
51  
52  
53  
54  
55  
56  
57  
58  
59  
60

1  
2 located; and, vi) licence any third party to do any or all of the above.  
3  
4

5 **Transparency:** The lead author (the manuscript's guarantor) affirms that the manuscript is an  
6 honest, accurate, and transparent account of the study being reported; that no important  
7 aspects of the study have been omitted; and that any discrepancies from the study as  
8 planned (and, if relevant, registered) have been explained.  
9  
10  
11  
12

13  
14 **Data Sharing:** no additional data available.  
15  
16  
17  
18  
19  
20  
21  
22  
23  
24  
25  
26  
27  
28  
29  
30  
31  
32  
33  
34  
35  
36  
37  
38  
39  
40  
41  
42  
43  
44  
45  
46  
47  
48  
49  
50  
51  
52  
53  
54  
55  
56  
57  
58  
59  
60

1  
2  
3  
4  
5  
6  
7  
8  
9  
10  
11  
12  
13  
14  
15  
16  
17  
18  
19  
20  
21  
22  
23  
24  
25  
26  
27  
28  
29  
30  
31  
32  
33  
34  
35  
36  
37  
38  
39  
40  
41  
42  
43  
44  
45  
46  
47  
48  
49  
50  
51  
52  
53  
54  
55  
56  
57  
58  
59  
60  
**REFERENCES**

- 1 Holt RIG, Groot M de, Lucki I, *et al.* NIDDK International Conference Report on Diabetes and Depression: Current Understanding and Future Directions. *Diabetes Care* 2014;**37**:2067–77. doi:10.2337/dc13-2134
- 2 Association of Depression and Diabetes Complications: A Meta... : Psychosomatic Medicine. LWW. [http://journals.lww.com/psychosomaticmedicine/Fulltext/2001/07000/Association\\_of\\_Depression\\_and\\_Diabetes.15.aspx](http://journals.lww.com/psychosomaticmedicine/Fulltext/2001/07000/Association_of_Depression_and_Diabetes.15.aspx) (accessed 18 Apr 2017).
- 3 Ali S, Stone M, Skinner TC, *et al.* The association between depression and health-related quality of life in people with type 2 diabetes: a systematic literature review. *Diabetes Metab Res Rev* 2010;**26**:75–89. doi:10.1002/dmrr.1065
- 4 Holt RIG, de Groot M, Golden SH. Diabetes and Depression. *Curr Diab Rep* 2014;**14**:491. doi:10.1007/s11892-014-0491-3
- 5 Knol MJ, Twisk JWR, Beekman ATF, *et al.* Depression as a risk factor for the onset of type 2 diabetes mellitus. A meta-analysis. *Diabetologia* 2006;**49**:837. doi:10.1007/s00125-006-0159-x
- 6 Golden SH, Lazo M, Carnethon M, *et al.* Examining a Bidirectional Association Between Depressive Symptoms and Diabetes. *JAMA J Am Med Assoc* 2008;**299**:2751–9. doi:10.1001/jama.299.23.2751
- 7 Collaboration ERF, Seshasai SRK, Kaptoge S, *et al.* Diabetes mellitus, fasting glucose, and risk of cause-specific death. *N Engl J Med* 2011;**364**:829–841. doi:10.1056/NEJMoa1008862
- 8 Singhal A, Ross J, Seminog O, *et al.* Risk of self-harm and suicide in people with specific psychiatric and physical disorders: comparisons between disorders using English national record linkage. *J R Soc Med* 2014;**107**:194–204. doi:10.1177/0141076814522033
- 9 Wang Y, Tang S, Xu S, *et al.* Association between diabetes and risk of suicide death: A meta-analysis of 3 million participants. *Compr Psychiatry* 2016;**71**:11–6. doi:10.1016/j.comppsy.2016.08.006
- 10 Moulton CD, Pickup JC, Amiel SA, *et al.* Investigating incretin-based therapies as a novel treatment for depression in type 2 diabetes: Findings from the South London Diabetes (SOUL-D) Study. *Prim Care Diabetes* 2016;**10**:156–9. doi:10.1016/j.pcd.2015.06.003
- 11 Colle R, de Larminat D, Rotenberg S, *et al.* Pioglitazone could induce remission in major depression: a meta-analysis. *Neuropsychiatr Dis Treat* 2016;**13**:9–16. doi:10.2147/NDT.S121149
- 12 Kemp DE, Ismail-Beigi F, Ganocy SJ, *et al.* Use of Insulin Sensitizers for the Treatment of Major Depressive Disorder: A Pilot Study of Pioglitazone for Major Depression Accompanied by Abdominal Obesity. *J Affect Disord* 2012;**136**:1164–73. doi:10.1016/j.jad.2011.06.033
- 13 Wahlqvist ML, Lee M-S, Chuang S-Y, *et al.* Increased risk of affective disorders in type 2 diabetes is minimized by sulfonylurea and metformin combination: a population-based cohort study. *BMC Med* 2012;**10**:150. doi:10.1186/1741-7015-10-150

- 1  
2 14 Berge LI, Riise T, Tell GS, *et al.* Depression in Persons with Diabetes by Age and Antidiabetic  
3 Treatment: A Cross-Sectional Analysis with Data from the Hordaland Health Study. *PLoS ONE*  
4 2015;**10**. doi:10.1371/journal.pone.0127161  
5
- 6 15 Bode BW, Testa MA, Magwire M, *et al.* Patient-reported outcomes following treatment with the  
7 human GLP-1 analogue liraglutide or glimepiride in monotherapy: results from a randomized  
8 controlled trial in patients with type 2 diabetes. *Diabetes Obes Metab* 2010;**12**:604–12.  
9 doi:10.1111/j.1463-1326.2010.01196.x  
10
- 11 16 Alvarez E, Roncero I, Chowen JA, *et al.* Expression of the glucagon-like peptide-1 receptor gene in  
12 rat brain. *J Neurochem* 1996;**66**:920–7.  
13  
14
- 15 17 Lockie SH. Glucagon-Like Peptide-1 Receptor in the Brain: Role in Neuroendocrine Control of  
16 Energy Metabolism and Treatment Target for Obesity. *J Neuroendocrinol* 2013;**25**:597–604.  
17 doi:10.1111/jne.12039  
18
- 19 18 Kohen I, Lester P. Exenatide-induced depression in a geriatric patient. *Int J Geriatr Psychiatry*  
20 2008;**23**:443–4.  
21  
22
- 23 19 European Medicines Agency. Januvia: European Public Assessment Report (EPAR) - Scientific  
24 Discussion. European Medicines Agency 2007.  
25
- 26 20 U.S. Food and Drug Administration - Center For Drug Evaluation and Research. Application  
27 number: 21-995 Medical review. 2006.  
28 [http://www.accessdata.fda.gov/drugsatfda\\_docs/nda/2006/021995s000\\_MedR.pdf](http://www.accessdata.fda.gov/drugsatfda_docs/nda/2006/021995s000_MedR.pdf) (accessed 24  
29 Nov 2014).  
30
- 31 21 Prescrire Editorial Staff. Sitagliptin. Type 2 diabetes: limited efficacy, too many unknown risks.  
32 *Prescrire Int* 2008;**17**:12–5.  
33  
34
- 35 22 Maes M, De Meester I, Scharpe S, *et al.* Alterations in plasma dipeptidyl peptidase IV enzyme  
36 activity in depression and schizophrenia: effects of antidepressants and antipsychotic drugs. *Acta*  
37 *Psychiatr Scand* 1996;**93**.  
38
- 39 23 Maes M, De Meester I, Vanhoof G, *et al.* Decreased serum dipeptidyl peptidase IV activity in  
40 major depression. *Biol Psychiatry* 1991;**30**:577–86.  
41  
42
- 43 24 Maes M, De Meester I, Verkerk R, *et al.* Lower serum dipeptidyl peptidase IV activity in treatment  
44 resistant major depression: relationships with immune-inflammatory markers.  
45 *Psychoneuroendocrinology* 1997;**22**.  
46
- 47 25 Grant P, Lipscomb D, Quin J. Psychological and quality of life changes in patients using GLP-1  
48 analogues. *J Diabetes Complications* 2011;**25**:244–6. doi:10.1016/j.jdiacom.2011.03.002  
49  
50
- 51 26 Gamble J-M, Thomas JM, Twells LK, *et al.* Comparative effectiveness of incretin-based therapies  
52 and the risk of death and cardiovascular events in 38,233 metformin monotherapy users: *Medicine*  
53 *(Baltimore)* 2016;**95**:e3995. doi:10.1097/MD.0000000000003995  
54
- 55 27 Herrett E, Gallagher AM, Bhaskaran K, *et al.* Data Resource Profile: Clinical Practice Research  
56 Datalink (CPRD). *Int J Epidemiol* 2015;**44**:827–36. doi:10.1093/ije/dyv098  
57  
58  
59



- 1  
2 28 Herrett E, Thomas SL, Schoonen WM, *et al.* Validation and validity of diagnoses in the General  
3 Practice Research Database: a systematic review. *Br J Clin Pharmacol* 2010;**69**:4–14.  
4 doi:10.1111/j.1365-2125.2009.03537.x  
5
- 6 29 Jick SS, Kaye JA, Vasilakis-Scaramozza C, *et al.* Validity of the general practice research database.  
7 *Pharmacotherapy* 2003;**23**:686–689.  
8
- 9 30 Williams T, Van Staa T, Puri S, *et al.* Recent advances in the utility and use of the General Practice  
10 Research Database as an example of a UK Primary Care Data resource. *Ther Adv Drug Saf*  
11 2012;**3**:89–99. doi:10.1177/2042098611435911  
12  
13
- 14 31 Bornand D, Toovey S, Jick SS, *et al.* The risk of new onset depression in association with influenza  
15 – A population-based observational study. *Brain Behav Immun* 2016;**53**:131–7.  
16 doi:10.1016/j.bbi.2015.12.005  
17
- 18 32 Hagberg KW, Li L, Peng M, *et al.* Incidence rates of suicidal behaviors and treated depression in  
19 patients with and without psoriatic arthritis using the Clinical Practice Research Datalink. *Mod*  
20 *Rheumatol* 2016;**26**:774–9. doi:10.3109/14397595.2015.1136726  
21  
22
- 23 33 Jick H, Kaye JA, Jick SS. Antidepressants and the Risk of Suicidal Behaviors. *JAMA*  
24 2004;**292**:338–43. doi:10.1001/jama.292.3.338  
25
- 26 34 Thomas KH, Martin RM, Davies NM, *et al.* Smoking cessation treatment and risk of depression,  
27 suicide, and self harm in the Clinical Practice Research Datalink: prospective cohort study. *BMJ*  
28 2013;**347**:f5704–f5704. doi:10.1136/bmj.f5704  
29  
30
- 31 35 Welk B, McArthur E, Ordon M, *et al.* Association of Suicidality and Depression With 5α-  
32 Reductase Inhibitors. *JAMA Intern Med* 2017;**177**:683–91. doi:10.1001/jamainternmed.2017.0089  
33
- 34 36 Schneeweiss S, Rassen JA, Glynn RJ, *et al.* High-dimensional propensity score adjustment in  
35 studies of treatment effects using health care claims data. *Epidemiology* 2009;**20**:512–522.  
36 doi:10.1097/EDE.0b013e3181a663cc  
37
- 38 37 Sevilla-González M del R, Quintana-Mendoza BM, Aguilar-Salinas CA. Interaction Between  
39 Depression, Obesity, and Type 2 Diabetes: A Complex Picture. *Arch Med Res* 2017;**48**:582–91.  
40 doi:10.1016/j.arcmed.2018.02.004  
41  
42
- 43 38 Svenningsson I, Björkelund C, Marklund B, *et al.* Anxiety and depression in obese and normal-  
44 weight individuals with diabetes type 2: A gender perspective. *Scand J Caring Sci*; **26**:349–54.  
45 doi:10.1111/j.1471-6712.2011.00940.x  
46
- 47 39 Anderberg RH, Richard JE, Hansson C, *et al.* GLP-1 is both anxiogenic and antidepressant;  
48 divergent effects of acute and chronic GLP-1 on emotionality. *Psychoneuroendocrinology*  
49 2016;**65**:54–66. doi:10.1016/j.psyneuen.2015.11.021  
50
- 51 40 Anderberg RH, Anefors C, Bergquist F, *et al.* Dopamine signaling in the amygdala, increased by  
52 food ingestion and GLP-1, regulates feeding behavior. *Physiol Behav* 2014;**136**:135–44.  
53 doi:10.1016/j.physbeh.2014.02.026  
54  
55  
56  
57  
58  
59



- 1  
2 41 Dixit TS, Sharma AN, Lucot JB, *et al.* Antipsychotic-like effect of GLP-1 agonist liraglutide but  
3 not DPP-IV inhibitor sitagliptin in mouse model for psychosis. *Physiol Behav* 2013;**114–115**:38–  
4 41. doi:10.1016/j.physbeh.2013.03.008  
5
- 6 42 Laake J-PS, Stahl D, Amiel SA, *et al.* The Association Between Depressive Symptoms and  
7 Systemic Inflammation in People With Type 2 Diabetes: Findings From the South London  
8 Diabetes Study. *Diabetes Care* 2014;:DC\_132522. doi:10.2337/dc13-2522  
9
- 10 43 Pilot randomised controlled trial of SITAgliptin for Depressive Symptoms in type 2 diabetes  
11 (EudraCT Number: 2015-004527-32). [https://www.clinicaltrialsregister.eu/ctr-](https://www.clinicaltrialsregister.eu/ctr-search/search?query=2015-004527-32)  
12 [search/search?query=2015-004527-32](https://www.clinicaltrialsregister.eu/ctr-search/search?query=2015-004527-32) (accessed 7 Dec 2017).  
13  
14
- 15 44 Fiest KM, Jette N, Quan H, *et al.* Systematic review and assessment of validated case definitions  
16 for depression in administrative data. *BMC Psychiatry* 2014;**14**:289.  
17
- 18 45 Thomas KH, Davies N, Metcalfe C, *et al.* Validation of suicide and self-harm records in the  
19 Clinical Practice Research Datalink: Validation of suicide and self-harm records. *Br J Clin*  
20 *Pharmacol* 2013;**76**:145–57. doi:10.1111/bcp.12059  
21  
22  
23  
24  
25  
26  
27  
28  
29  
30  
31  
32  
33  
34  
35  
36  
37  
38  
39  
40  
41  
42  
43  
44  
45  
46  
47  
48  
49  
50  
51  
52  
53  
54  
55  
56  
57  
58  
59  
60

## TABLES

**Table 1. Patient Characteristics of New-user DPP-4 Inhibitor Cohort Before and After Propensity Score Matching, and GLP-1 Receptor Agonist Cohorts.**

|                                                          | DPP4 Inhibitor New User Cohort Before Propensity Score Matching |                 | DPP4 Inhibitor New User Cohort After Propensity Score Matching |                |
|----------------------------------------------------------|-----------------------------------------------------------------|-----------------|----------------------------------------------------------------|----------------|
|                                                          | DPP-4i<br>(n=6206)                                              | SU<br>(n=22128) | DPP-4i<br>(n=6008)                                             | SU<br>(n=6008) |
| Age in yrs (sd)                                          | 58(12.2)                                                        | 60.5(13.8)      | 58.1(12.2)                                                     | 58.2(12.5)     |
| Female                                                   | 2258(36.4%)                                                     | 8107(36.6%)     | 2189(36.4%)                                                    | 2187(36.4%)    |
| Measure of deprivation                                   |                                                                 |                 |                                                                |                |
| Least                                                    | 624(10.1%)                                                      | 2492(11.3%)     | 603(10%)                                                       | 594(9.9%)      |
| Most                                                     | 615(9.9%)                                                       | 2342(10.6%)     | 603(10%)                                                       | 614(10.2%)     |
| Unknown                                                  | 2862(46.1%)                                                     | 8780(39.7%)     | 2739(45.6%)                                                    | 2683(44.7%)    |
| Diabetes duration in yrs (sd)                            | 2.0(1.8)                                                        | 1.0(1.5)        | 1.9(1.7)                                                       | 1.9(1.8)       |
| Body Mass Index >30                                      | 4162(67.1%)                                                     | 10661(48.2%)    | 3994(66.5%)                                                    | 3978(66.2%)    |
| Number of hospitalizations in year prior to cohort entry |                                                                 |                 |                                                                |                |
| 0                                                        | 5647(91%)                                                       | 18516(83.7%)    | 5452(90.7%)                                                    | 5470(91%)      |
| 1                                                        | 378(6.1%)                                                       | 2105(9.5%)      | 375(6.2%)                                                      | 379(6.3%)      |
| 2                                                        | 109(1.8%)                                                       | 784(3.5%)       | 109(1.8%)                                                      | 92(1.5%)       |
| 3+                                                       | 72(1.2%)                                                        | 723(3.3%)       | 72(1.2%)                                                       | 67(1.1%)       |
| Number of drugs in year prior to cohort entry            |                                                                 |                 |                                                                |                |
| 0-4                                                      | 721(11.6%)                                                      | 3098(14%)       | 703(11.7%)                                                     | 671(11.2%)     |
| 5-10                                                     | 3204(51.6%)                                                     | 10379(46.9%)    | 3081(51.3%)                                                    | 3119(51.9%)    |
| 11+                                                      | 2281(36.8%)                                                     | 8651(39.1%)     | 2224(37%)                                                      | 2218(36.9%)    |
| HbA1c                                                    |                                                                 |                 |                                                                |                |
| <6.5%                                                    | 242(3.9%)                                                       | 1393(6.3%)      | 238(4%)                                                        | 233(3.9%)      |
| 6.5-7.5%                                                 | 1104(17.8%)                                                     | 3349(15.1%)     | 1049(17.5%)                                                    | 1053(17.5%)    |
| 7.5-9%                                                   | 2831(45.6%)                                                     | 7121(32.2%)     | 2701(45%)                                                      | 2694(44.8%)    |
| 9%+                                                      | 2000(32.2%)                                                     | 9833(44.4%)     | 1991(33.1%)                                                    | 2007(33.4%)    |
| Unknown                                                  | 29(<1%)                                                         | 432(2%)         | 29(<1%)                                                        | 21(<1%)        |
| eGFR <60                                                 | 883(14.2%)                                                      | 4429(20%)       | 857(14.3%)                                                     | 890(14.8%)     |
| Diagnoses in year prior to cohort entry                  |                                                                 |                 |                                                                |                |
| Heart Failure                                            | 68(1.1%)                                                        | 369(1.7%)       | 68(1.1%)                                                       | 51(<1%)        |
| Hypertension                                             | 1095(17.6%)                                                     | 4475(20.2%)     | 1066(17.7%)                                                    | 1087(18.1%)    |
| Dyslipidemia                                             | 213(3.4%)                                                       | 1093(4.9%)      | 213(3.5%)                                                      | 212(3.5%)      |
| Ischemic heart                                           | 174(2.8%)                                                       | 1033(4.7%)      | 171(2.8%)                                                      | 168(2.8%)      |
| Peripheral vascular                                      | 25(<1%)                                                         | 145(<1%)        | 25(<1%)                                                        | 24(<1%)        |
| Prescription drug use in year prior to cohort entry      |                                                                 |                 |                                                                |                |
| Metformin                                                | 5775(93.1%)                                                     | 16534(74.7%)    | 5578(92.8%)                                                    | 5638(93.8%)    |
| Acarbose                                                 | S                                                               | 8(<1%)          | S                                                              | S              |
| SGLT2 inhibitors                                         | 38(<1%)                                                         | 93(<1%)         | 38(<1%)                                                        | 40(<1%)        |
| Meglitinide                                              | 47(<1%)                                                         | 39(<1%)         | 38(<1%)                                                        | 29(<1%)        |
| Thiazolidinedione                                        | 252(4.1%)                                                       | 403(1.8%)       | 222(3.7%)                                                      | 209(3.5%)      |
| Insulin                                                  | 82(1.3%)                                                        | 331(1.5%)       | 80(1.3%)                                                       | 86(1.4%)       |
| Hypnotic                                                 | 332(5.3%)                                                       | 1486(6.7%)      | 328(5.5%)                                                      | 324(5.4%)      |
| Mood                                                     | 85(1.4%)                                                        | 280(1.3%)       | 81(1.3%)                                                       | 83(1.4%)       |
| Anticonvulsant                                           | 271(4.4%)                                                       | 832(3.8%)       | 260(4.3%)                                                      | 266(4.4%)      |
| Antipsychotics                                           | 176(2.8%)                                                       | 829(3.7%)       | 172(2.9%)                                                      | 171(2.8%)      |

S = suppressed due to low number of events

**Table 2. Measures of frequency and association for depression or self-harm in new-users of DPP-4 Inhibitors (DPP4i) or new-users of GLP-1 receptor agonists (GLP1ra) vs. sulfonylureas (SU), thiazolidinediones (TZD), or insulin.**

|                                         | DPP4 Inhibitor New User Cohort |                 | GLP1 Receptor Agonist New User Cohort |                 |
|-----------------------------------------|--------------------------------|-----------------|---------------------------------------|-----------------|
| <b>COMPARATOR: SU</b>                   |                                |                 |                                       |                 |
|                                         | <b>DPP4i</b>                   | <b>SU</b>       | <b>GLP1ra</b>                         | <b>SU</b>       |
| Number of patients                      | 6206                           | 22128           | 501                                   | 16409           |
| Person-years of follow-up               | 5589                           | 18596           | 549                                   | 13418           |
| Number of Events                        | 46                             | 218             | 10                                    | 183             |
| Incidence per 1000 person-years (95%CI) | 8.2(6.2-11)                    | 11.7(10.3-13.4) | 18.2(10-33.5)                         | 13.6(11.8-15.8) |
| Crude HR                                | 0.70(0.51-0.96)                | -ref-           | 1.36(0.72-2.58)                       | -ref-           |
| Adjusted HR                             | 0.80(0.57-1.13)                | -ref-           | 1.25(0.63-2.50)                       | -ref-           |
| <b>COMPARATOR: TZD</b>                  |                                |                 |                                       |                 |
|                                         | <b>DPP4i</b>                   | <b>TZD</b>      | <b>GLP1ra</b>                         | <b>TZD</b>      |
| Number of patients                      | 9565                           | 2512            | 851                                   | 2011            |
| Person-years of follow-up               | 9190                           | 2786            | 1035                                  | 2165            |
| Number of Events                        | 92                             | 30              | 17                                    | 27              |
| Incidence per 1000 person-years (95%CI) | 10.0(8.2-12.3)                 | 10.8(7.6-15.4)  | 16.4(10.3-26.3)                       | 12.5(8.6-18.1)  |
| Crude HR                                | 0.90(0.59-1.36)                | -ref-           | 1.32(0.72-2.42)                       | -ref-           |
| Adjusted HR                             | 1.17(0.70-1.96)                | -ref-           | 1.18(0.53-2.65)                       | -ref-           |
| <b>COMPARATOR: INSULIN</b>              |                                |                 |                                       |                 |
|                                         | <b>DPP4i</b>                   | <b>Insulin</b>  | <b>GLP1ra</b>                         | <b>Insulin</b>  |
| Number of patients                      | 10049                          | 3600            | 854                                   | 2745            |
| Person-years of follow-up               | 9878                           | 1161            | 1033                                  | 919             |
| Number of Events                        | 97                             | 24              | 14                                    | 19              |
| Incidence per 1000 person-years (95%CI) | 9.8(8.1-12)                    | 20.7(13.9-30.8) | 13.6(8.1-22.7)                        | 20.7(13.3-32.3) |
| Crude HR                                | 0.54(0.34-0.87)                | -ref-           | 0.74(0.35-1.56)                       | -ref-           |
| Adjusted HR                             | 0.98(0.53-1.83)                | -ref-           | 1.07(0.39-2.94)                       | -ref-           |

**Table 3. Patient Characteristics of New-user GLP-1 Receptor Agonist Cohort Before and After Propensity Score Matching.**

|                                                          | GLP-1 Receptor Agonist New User Cohort Before Propensity Score Matching |              | GLP-1 Receptor Agonist New User Cohort After Propensity Score Matching |            |
|----------------------------------------------------------|-------------------------------------------------------------------------|--------------|------------------------------------------------------------------------|------------|
|                                                          | GLP-1RA (n=501)                                                         | SU (n=16409) | GLP-1RA (n=488)                                                        | SU (n=488) |
| Age in yrs (sd)                                          | 49.4(11.3)                                                              | 57.8(12.9)   | 49.7(11.2)                                                             | 49.2(12.6) |
| Female                                                   | 204(40.7%)                                                              | 6021(36.7%)  | 198(40.6%)                                                             | 174(35.7%) |
| Measure of                                               |                                                                         |              |                                                                        |            |
| Least                                                    | 40(8%)                                                                  | 1688(10.3%)  | 40(8.2%)                                                               | 29(5.9%)   |
| Most                                                     | 56(11.2%)                                                               | 1770(10.8%)  | 56(11.5%)                                                              | 52(10.7%)  |
| Unknown                                                  | 240(47.9%)                                                              | 6784(41.3%)  | 230(47.1%)                                                             | 214(43.9%) |
| Diabetes duration in yrs (sd)                            | 1.7(1.6)                                                                | 1.2(1.6)     | 1.7(1.6)                                                               | 1.7(1.8)   |
| Body Mass Index>30                                       | 470(93.8%)                                                              | 10481(63.9%) | 458(93.9%)                                                             | 452(92.6%) |
| Number of hospitalizations in year prior to cohort entry |                                                                         |              |                                                                        |            |
| 0                                                        | 456(91%)                                                                | 14170(86.4%) | 445(91.2%)                                                             | 437(89.5%) |
| 1                                                        | 29(5.8%)                                                                | 1344(8.2%)   | 28(5.7%)                                                               | 27(5.5%)   |
| 2                                                        | 10(2%)                                                                  | 499(3%)      | 9(1.8%)                                                                | 17(3.5%)   |
| 3+                                                       | 6(1.2%)                                                                 | 396(2.4%)    | 6(1.2%)                                                                | 7(1.4%)    |
| Number of drugs in year prior to cohort entry            |                                                                         |              |                                                                        |            |
| 0-4                                                      | 17(3.4%)                                                                | 1660(10.1%)  | 17(3.5%)                                                               | 18(3.7%)   |
| 5-10                                                     | 195(38.9%)                                                              | 7899(48.1%)  | 192(39.3%)                                                             | 208(42.6%) |
| 11+                                                      | 289(57.7%)                                                              | 6850(41.7%)  | 279(57.2%)                                                             | 262(53.7%) |
| HbA1c                                                    |                                                                         |              |                                                                        |            |
| <6.5%                                                    | 66(13.2%)                                                               | 1085(6.6%)   | 62(12.7%)                                                              | 66(13.5%)  |
| 6.5-7.5%                                                 | 99(19.8%)                                                               | 2593(15.8%)  | 97(19.9%)                                                              | 99(20.3%)  |
| 7.5-9%                                                   | 150(29.9%)                                                              | 5357(32.6%)  | 145(29.7%)                                                             | 134(27.5%) |
| 9%+                                                      | 179(35.7%)                                                              | 7068(43.1%)  | 177(36.3%)                                                             | 178(36.5%) |
| Unknown                                                  | 7(1.4%)                                                                 | 306(1.9%)    | 7(1.4%)                                                                | 11(2.3%)   |
| eGFR <60                                                 | 36(7.2%)                                                                | 2821(17.2%)  | 35(7.2%)                                                               | 40(8.2%)   |
| Diagnoses in year prior to cohort entry                  |                                                                         |              |                                                                        |            |
| Heart Failure                                            | 5(1%)                                                                   | 244(1.5%)    | 5(1%)                                                                  | 6(1.2%)    |
| Hypertension                                             | 107(21.4%)                                                              | 3398(20.7%)  | 106(21.7%)                                                             | 104(21.3%) |
| Dyslipidemia                                             | 16(3.2%)                                                                | 771(4.7%)    | 16(3.3%)                                                               | 23(4.7%)   |
| Ischemic heart                                           | 11(2.2%)                                                                | 644(3.9%)    | 11(2.3%)                                                               | 9(1.8%)    |
| Peripheral                                               | S                                                                       | 106(<1%)     | S                                                                      | S          |
| Prescription drug use in year prior to cohort entry      |                                                                         |              |                                                                        |            |
| Metformin                                                | 457(91.2%)                                                              | 13542(82.5%) | 445(91.2%)                                                             | 449(92%)   |
| Acarbose                                                 | 2(<1%)                                                                  | 7(<1%)       | 1(<1%)                                                                 | 1(<1%)     |
| SGLT2 inhibitors                                         | 5(1%)                                                                   | 87(<1%)      | 5(1%)                                                                  | 5(1%)      |
| Meglitinide                                              | 11(2.2%)                                                                | 39(<1%)      | 10(2%)                                                                 | 10(2%)     |
| Thiazolidinedione                                        | 38(7.6%)                                                                | 376(2.3%)    | 38(7.8%)                                                               | 41(8.4%)   |
| Insulin                                                  | 65(13%)                                                                 | 307(1.9%)    | 55(11.3%)                                                              | 59(12.1%)  |
| Hypnotic                                                 | 32(6.4%)                                                                | 1093(6.7%)   | 32(6.6%)                                                               | 35(7.2%)   |
| Mood                                                     | 10(2%)                                                                  | 228(1.4%)    | 10(2%)                                                                 | 8(1.6%)    |
| Anticonvulsant                                           | 33(6.6%)                                                                | 682(4.2%)    | 31(6.4%)                                                               | 32(6.6%)   |
| Antipsychotics                                           | 12(2.4%)                                                                | 507(3.1%)    | <b>12(2.5%)</b>                                                        | 12(2.5%)   |

S = suppressed due to low number of events

## FIGURES

**Figure 1. Flow Diagram to Identify Initiators of DPP-4 Inhibitors and Sulfonylureas (DPP-4 Inhibitor Cohort), and GLP-1 Receptor Agonists and Sulfonylureas (GLP-1 Receptor Agonist Cohort)**

**Figure 1. Hazard Ratios and Number of Events within DPP-4 Inhibitor (DPP4i) and Sulfonylurea (SU) Users Across Sensitivity Analysis**

**Figure 3. Hazard Ratios and Number of Events within GLP-1 Receptor Agonist (GLP1ra) and Sulfonylurea (SU) Users Across Sensitivity Analysis**



Flow Diagram to Identify Initiators of DPP-4 Inhibitors and Sulfonylureas (DPP-4 Inhibitor Cohort), and GLP-1 Receptor Agonists and Sulfonylureas (GLP-1 Receptor Agonist Cohort)

177x181mm (300 x 300 DPI)



Hazard Ratios and Number of Events within DPP-4 Inhibitor (DPP4i) and Sulfonylurea (SU) Users Across Sensitivity Analysis

peer review only



1  
2  
3  
4  
5  
6  
7  
8  
9  
10  
11  
12  
13  
14  
15  
16  
17  
18  
19  
20  
21  
22  
23  
24  
25  
26  
27  
28  
29  
30  
31  
32  
33  
34  
35  
36  
37  
38  
39  
40  
41  
42  
43  
44  
45  
46  
47  
48  
49  
50  
51  
52  
53  
54  
55  
56  
57  
58  
59  
60



Hazard Ratios and Number of Events within GLP-1 Receptor Agonist (GLP1ra) and Sulfonylurea (SU) Users Across Sensitivity Analysis

peer review only

## Supplementary Material

## Appendix A: READ and ICD-10 Codes Used to Identify Depression

| READ Code      | Description                                                                              |
|----------------|------------------------------------------------------------------------------------------|
| <b>3004a</b>   | Depression                                                                               |
| <b>E2b..00</b> | Depressive Disorder Nec                                                                  |
| <b>E204.00</b> | Neurotic Depression Reactive Type                                                        |
| <b>1b17.00</b> | Depressed                                                                                |
| <b>Eu32z11</b> | [X]Depression Nos                                                                        |
| <b>3004am</b>  | Mood Depressed                                                                           |
| <b>3004er</b>  | Reactive Depression                                                                      |
| <b>1b17.11</b> | C/O - Feeling Depressed                                                                  |
| <b>3004l</b>   | Looking Depressed                                                                        |
| <b>E112.14</b> | Endogenous Depression                                                                    |
| <b>E112.11</b> | Agitated Depression                                                                      |
| <b>2960ad</b>  | Depression Agitated                                                                      |
| <b>E204.11</b> | Postnatal Depression                                                                     |
| <b>E135.00</b> | Agitated Depression                                                                      |
|                |                                                                                          |
| ICD-10 Code    | Definition                                                                               |
| <b>F20.4</b>   | post-schizophrenic depression                                                            |
| <b>F31.3</b>   | Bipolar affective disorder, current episode mild or moderate depression                  |
| <b>F31.4</b>   | Bipolar affective disorder, current episode severe depression without psychotic symptoms |
| <b>F31.5</b>   | Bipolar affective disorder, current episode severe depression with psychotic symptoms    |
| <b>F31.6</b>   | Bipolar affective disorder, current episode mixed                                        |
| <b>F32.0</b>   | Mild depressive episode                                                                  |
| <b>F32.1</b>   | Moderate depressive episode                                                              |
| <b>F32.2</b>   | Severe depressive episode without psychotic symptoms                                     |
| <b>F32.3</b>   | Severe depressive episode with psychotic symptoms                                        |
| <b>F32.4</b>   | Depressive disorder, single episode in partial remission                                 |
| <b>F32.5</b>   | Depressive disorder, single episode in full remission                                    |
| <b>F32.8</b>   | Other depressive episodes                                                                |
| <b>F32.9</b>   | Depressive episode, unspecified                                                          |
| <b>F33.0</b>   | Recurrent depressive disorder, current episode                                           |

|              |                                                                                  |
|--------------|----------------------------------------------------------------------------------|
|              | mild                                                                             |
| <b>F33.1</b> | Recurrent depressive disorder, current episode moderate                          |
| <b>F33.2</b> | Recurrent depressive disorder, current episode severe without psychotic symptoms |
| <b>F33.3</b> | Recurrent depressive disorder, current episode severe with psychotic symptoms    |
| <b>F33.8</b> | Other recurrent depressive disorders                                             |
| <b>F33.9</b> | Recurrent depressive disorder, unspecified                                       |
| <b>F34.1</b> | Dysthymia                                                                        |
| <b>F34.8</b> | Other persistent mood [affective] disorders                                      |
| <b>F34.9</b> | Persistent mood [affective] disorder, unspecified                                |
| <b>F38.0</b> | Other single mood [affective] disorders                                          |
| <b>F38.1</b> | Other recurrent mood [affective] disorders                                       |
| <b>F38.8</b> | Other specified mood [affective] disorders                                       |
| <b>F39</b>   | Unspecified mood [affective] disorder                                            |
| <b>F41.2</b> | Mixed anxiety and depressive disorder                                            |
| <b>F99</b>   | Mental disorder, not elsewhere specified                                         |

#### Appendix B: READ and ICD-10 Codes Used to Identify Self-harm

| READ Code      | Description                                                     |
|----------------|-----------------------------------------------------------------|
| <b>SL..14</b>  | Overdose of biological substance                                |
| <b>SL..15</b>  | Overdose of drug                                                |
| <b>SLHz.00</b> | Drug and medicament poisoning not otherwise specified           |
| <b>TK..00</b>  | Suicide and self-inflicted injury                               |
| <b>TK..11</b>  | Cause of overdose "deliberate                                   |
| <b>TK..12</b>  | Injury "self-inflicted                                          |
| <b>TK..13</b>  | Poisoning "self-inflicted                                       |
| <b>TK..14</b>  | Suicide and self-harm                                           |
| <b>TK..15</b>  | Attempted suicide                                               |
| <b>TK..17</b>  | Para-suicide                                                    |
| <b>TK0.00</b>  | Suicide + self-inflicted poisoning by solid/liquid substances   |
| <b>TK00.00</b> | Suicide + self-inflicted poisoning by analgesic/antipyretic     |
| <b>TK01.00</b> | Suicide + self-inflicted poisoning by barbiturates              |
| <b>TK01000</b> | Suicide and self-inflicted injury by amylobarbitone             |
| <b>TK01100</b> | Suicide and self-inflicted injury by barbitone                  |
| <b>TK01400</b> | Suicide and self-inflicted injury by phenobarbitone             |
| <b>TK02.00</b> | Suicide + self-inflicted poisoning by other sedatives/hypnotics |
| <b>TK03.00</b> | Suicide + self-inflicted poisoning tranquilizer/psychotropic    |
| <b>TK04.00</b> | Suicide + self-inflicted poisoning by other drugs/medicines     |

|    |                |                                                                                      |
|----|----------------|--------------------------------------------------------------------------------------|
| 1  | <b>TK05.00</b> | Suicide + self-inflicted poisoning by drug or medicine not otherwise specified       |
| 2  | <b>TK06.00</b> | Suicide + self-inflicted poisoning by agricultural chemical                          |
| 3  | <b>TK07.00</b> | Suicide + self-inflicted poisoning by corrosive/caustic substance                    |
| 4  | <b>TK0z.00</b> | Suicide + self-inflicted poisoning by solid/liquid substance not otherwise specified |
| 5  |                |                                                                                      |
| 6  |                |                                                                                      |
| 7  | <b>TK1.00</b>  | Suicide + self-inflicted poisoning by gases in domestic use                          |
| 8  | <b>TK10.00</b> | Suicide + self-inflicted poisoning by gas via pipeline                               |
| 9  |                |                                                                                      |
| 10 | <b>TK11.00</b> | Suicide + self-inflicted poisoning by liquified petrol gas                           |
| 11 | <b>TK1y.00</b> | Suicide and self-inflicted poisoning by other utility gas                            |
| 12 | <b>TK1z.00</b> | Suicide + self-inflicted poisoning by domestic gases not otherwise specified         |
| 13 |                |                                                                                      |
| 14 | <b>TK2.00</b>  | Suicide + self-inflicted poisoning by other gases and vapours                        |
| 15 | <b>TK20.00</b> | Suicide + self-inflicted poisoning by motor vehicle exhaust gas                      |
| 16 | <b>TK21.00</b> | Suicide and self-inflicted poisoning by other carbon monoxide                        |
| 17 |                |                                                                                      |
| 18 | <b>TK2z.00</b> | Suicide + self-inflicted poisoning by gases and vapours not otherwise specified      |
| 19 | <b>TK3.00</b>  | Suicide + self-inflicted injury by hang/strangulate/suffocate                        |
| 20 |                |                                                                                      |
| 21 | <b>TK30.00</b> | Suicide and self-inflicted injury by hanging                                         |
| 22 | <b>TK31.00</b> | Suicide + self-inflicted injury by suffocation by plastic bag                        |
| 23 | <b>TK3y.00</b> | Suicide + self-inflicted injury by other means than hang/strangle/suffocate          |
| 24 | <b>TK3z.00</b> | Suicide + self-inflicted injury by hang/strangle/suffocate not otherwise specified   |
| 25 |                |                                                                                      |
| 26 |                |                                                                                      |
| 27 | <b>TK4.00</b>  | Suicide and self-inflicted injury by drowning                                        |
| 28 |                |                                                                                      |
| 29 | <b>TK5.00</b>  | Suicide and self-inflicted injury by firearms and explosives                         |
| 30 | <b>TK51.00</b> | Suicide and self-inflicted injury by shotgun                                         |
| 31 | <b>TK52.00</b> | Suicide and self-inflicted injury by hunting rifle                                   |
| 32 | <b>TK54.00</b> | Suicide and self-inflicted injury by other firearm                                   |
| 33 | <b>TK5z.00</b> | Suicide and self-inflicted injury by firearms/explosives not otherwise specified     |
| 34 |                |                                                                                      |
| 35 | <b>TK6.00</b>  | Suicide and self-inflicted injury by cutting and stabbing                            |
| 36 |                |                                                                                      |
| 37 | <b>TK60.00</b> | Suicide and self-inflicted injury by cutting                                         |
| 38 | <b>TK60100</b> | Self-inflicted lacerations to wrist                                                  |
| 39 | <b>TK60111</b> | Slashed wrists self-inflicted                                                        |
| 40 |                |                                                                                      |
| 41 | <b>TK61.00</b> | Suicide and self-inflicted injury by stabbing                                        |
| 42 | <b>TK6z.00</b> | Suicide and self-inflicted injury by cutting and stabbing not otherwise specified    |
| 43 |                |                                                                                      |
| 44 | <b>TK7.00</b>  | Suicide and self-inflicted injury by jumping from high place                         |
| 45 | <b>TK70.00</b> | Suicide + self-inflicted injury " jump from residential premises                     |
| 46 | <b>TK71.00</b> | Suicide + self-inflicted injury " jump from other manmade structure                  |
| 47 | <b>TK72.00</b> | Suicide + self-inflicted injury " jump from natural sites                            |
| 48 | <b>TK7z.00</b> | Suicide + self-inflicted injury " jump from high place not otherwise specified       |
| 49 |                |                                                                                      |
| 50 | <b>TKx.00</b>  | Suicide and self-inflicted injury by other means                                     |
| 51 | <b>TKx0.00</b> | Suicide + self-inflicted injury " jump/lie before moving object                      |
| 52 | <b>TKx0000</b> | Suicide + self-inflicted injury " jumping before moving object                       |
| 53 | <b>TKx1.00</b> | Suicide and self-inflicted injury by burns or fire                                   |
| 54 | <b>TKx2.00</b> | Suicide and self-inflicted injury by scald                                           |
| 55 | <b>TKx3.00</b> | Suicide and self-inflicted injury by extremes of cold                                |
| 56 |                |                                                                                      |
| 57 |                |                                                                                      |
| 58 |                |                                                                                      |
| 59 |                |                                                                                      |

|    |                |                                                                               |
|----|----------------|-------------------------------------------------------------------------------|
| 1  | <b>TKx4.00</b> | Suicide and self-inflicted injury by electrocution                            |
| 2  | <b>TKx5.00</b> | Suicide and self-inflicted injury by crashing motor vehicle                   |
| 3  | <b>TKx6.00</b> | Suicide and self-inflicted injury by crashing of aircraft                     |
| 4  | <b>TKx7.00</b> | Suicide and self-inflicted injury caustic substance                           |
| 5  | <b>TKxy.00</b> | Suicide and self-inflicted injury by other specified means                    |
| 6  | <b>TKxz.00</b> | Suicide and self-inflicted injury by other means not otherwise specified      |
| 7  | <b>TKy.00</b>  | Late effects of self-inflicted injury                                         |
| 8  | <b>TKz.00</b>  | Suicide and self-inflicted injury not otherwise specified                     |
| 9  | <b>U2..00</b>  | [X]Intentional self-harm                                                      |
| 10 | <b>U2..11</b>  | [X]Self-inflicted injury                                                      |
| 11 | <b>U2..12</b>  | [X]Injury " self-inflicted                                                    |
| 12 | <b>U2..13</b>  | [X]Suicide                                                                    |
| 13 | <b>U2..14</b>  | [X]Attempted suicide                                                          |
| 14 | <b>U2..15</b>  | [X]Para-suicide                                                               |
| 15 | <b>U20.00</b>  | [X]Intentional self-poisoning/exposure to noxious substances                  |
| 16 | <b>U20.11</b>  | [X]Deliberate drug overdose/other poisoning                                   |
| 17 | <b>U200.00</b> | [X]Intentional self-poisoning/exposure to non-opioid analgesic                |
| 18 | <b>U200.11</b> | [X]Overdose " paracetamol                                                     |
| 19 | <b>U200.12</b> | [X]Overdose " ibuprofen                                                       |
| 20 | <b>U200.13</b> | [X]Overdose " aspirin                                                         |
| 21 | <b>U200000</b> | [X]Intentional self-poisoning/exposure to non-opioid analgesic at home        |
| 22 | <b>U200100</b> | [X]Intentional self-poisoning non-opioid analgesic at residential institution |
| 23 | <b>U200400</b> | [X]Intentional self-poisoning non-opioid analgesic in street/highway          |
| 24 | <b>U200500</b> | [X]Intentional self-poisoning non-opioid analgesic trade/service area         |
| 25 | <b>U200y00</b> | [X]Intentional self-poisoning non-opioid analgesic other specified place      |
| 26 | <b>U200z00</b> | [X]Intentional self-poisoning non-opioid analgesic unspecified place          |
| 27 | <b>U201.00</b> | [X]Intentional self-poisoning/exposure to antiepileptic                       |
| 28 | <b>U201000</b> | [X]Intentional self-poisoning/exposure to antiepileptic at home               |
| 29 | <b>U201z00</b> | [X]Intentional self-poisoning antiepileptic unspecified place                 |
| 30 | <b>U202.00</b> | [X]Intentional self-poisoning/exposure to sedative hypnotic                   |
| 31 | <b>U202.11</b> | [X]Overdose " sleeping tablets                                                |
| 32 | <b>U202.12</b> | [X]Overdose " diazepam                                                        |
| 33 | <b>U202.13</b> | [X]Overdose " temazepam                                                       |
| 34 | <b>U202.15</b> | [X]Overdose " nitrazepam                                                      |
| 35 | <b>U202.16</b> | [X]Overdose " benzodiazepine                                                  |
| 36 | <b>U202.17</b> | [X]Overdose " barbiturate                                                     |
| 37 | <b>U202.18</b> | [X]Overdose " amobarbital                                                     |
| 38 | <b>U202000</b> | [X]Intentional self-poisoning /exposure to sedative hypnotic at home          |
| 39 | <b>U202400</b> | [X]Intentional self-poisoning sedative hypnotic in street/highway             |
| 40 | <b>U202y00</b> | [X]Intentional self-poisoning sedative hypnotic other specified place         |
| 41 | <b>U202z00</b> | [X]Intentional self-poisoning sedative hypnotic unspecified place             |
| 42 | <b>U204.00</b> | [X]Intentional self-poisoning/exposure to psychotropic drug                   |
| 43 | <b>U204.11</b> | [X]Overdose " antidepressant                                                  |

|    |                |                                                                                                      |
|----|----------------|------------------------------------------------------------------------------------------------------|
| 1  | <b>U204.12</b> | [X]Overdose " amitriptyline                                                                          |
| 2  | <b>U204.13</b> | [X]Overdose " SSRI                                                                                   |
| 3  | <b>U204000</b> | [X]Intentional self-poisoning /exposure to psychotropic drug at home                                 |
| 4  | <b>U204100</b> | [X]Intentional self-poisoning psychotropic drug at residential institution                           |
| 5  | <b>U204y00</b> | [X]Intentional self-poisoning psychotropic drug other specified place                                |
| 6  | <b>U204z00</b> | [X]Intentional self-poisoning psychotropic drug unspecified place                                    |
| 7  | <b>U205000</b> | [X]Intentional self-poisoning/exposure to narcotic drug at home                                      |
| 8  | <b>U205y00</b> | [X]Intentional self-poisoning narcotic drug other specified place                                    |
| 9  | <b>U205z00</b> | [X]Intentional self-poisoning narcotic drug unspecified place                                        |
| 10 | <b>U206.00</b> | [X]Intentional self-poisoning/exposure to hallucinogen                                               |
| 11 | <b>U206400</b> | [X]Intentional self-poisoning hallucinogen in street/highway                                         |
| 12 | <b>U207.00</b> | [X]Intentional self-poisoning/exposure to other autonomic drug                                       |
| 13 | <b>U207000</b> | [X]Intentional self-poisoning/exposure to other autonomic drug at home                               |
| 14 | <b>U207z00</b> | [X]Intentional self-poisoning other autonomic drug unspecified place                                 |
| 15 | <b>U208.00</b> | [X]Intentional self-poisoning/exposure to other/unspecified drug/ medicament                         |
| 16 | <b>U208400</b> | [X]Intentional self-poisoning other/unspecified drug/medication in street/highway                    |
| 17 | <b>U208y00</b> | [X]Intentional self-poisoning other/unspecified drug/medication other specified place                |
| 18 | <b>U208z00</b> | [X]Intentional self-poisoning other/unspecified drug/medication unspecified place                    |
| 19 | <b>U20A.00</b> | [X]Intentional self-poisoning organic solvent                                                        |
| 20 | <b>U20A.11</b> | [X]Self-poisoning from glue solvent                                                                  |
| 21 | <b>U20A000</b> | "[X]Intentional self-poisoning organic solvent                                                       |
| 22 | <b>U20A400</b> | "[X]Intentional self-poisoning organic solvent                                                       |
| 23 | <b>U20Az00</b> | "[X]Intentional self-poisoning organic solvent                                                       |
| 24 | <b>U20B.00</b> | [X]Intentional self-poisoning/exposure to other gas/vapour U20B.11 [X]Self carbon monoxide poisoning |
| 25 | <b>U20B000</b> | [X]Intentional self-poisoning/exposure to other gas/vapour at home                                   |
| 26 | <b>U20B200</b> | [X]Intentional self-poisoning other gas/vapour school/public admin area                              |
| 27 | <b>U20By00</b> | [X]Intentional self-poisoning other gas/vapour other specified place                                 |
| 28 | <b>U20Bz00</b> | [X]Intentional self-poisoning other gas/vapour unspecified place                                     |
| 29 | <b>U20C.00</b> | [X]Intentional self-poisoning/exposure to pesticide                                                  |
| 30 | <b>U20C.11</b> | [X]Self-poisoning with weedkiller                                                                    |
| 31 | <b>U20C.12</b> | [X]Self-poisoning with paraquat                                                                      |
| 32 | <b>U20C000</b> | [X]Intentional self-poisoning/exposure to pesticide at home                                          |
| 33 | <b>U20Cy00</b> | [X]Intentional self-poisoning pesticide other specified place                                        |
| 34 | <b>U20y.00</b> | [X]Intentional self-poisoning/exposure to unspecified chemical                                       |
| 35 | <b>U20y000</b> | [X]Intentional self-poisoning/exposure to unspecified chemical at home                               |
| 36 | <b>U20y200</b> | [X]Intentional self-poisoning unspecified chemical school/public admin area                          |
| 37 | <b>U20yz00</b> | [X]Intentional self-poisoning unspecified chemical unspecified place                                 |
| 38 | <b>U21.00</b>  | [X]Intentional self-harm by hanging/strangulation/suffocation                                        |
| 39 | <b>U210.00</b> | [X]Intentional self-harm by hanging/strangulation/suffocation at home                                |

|                |                                                                                                          |
|----------------|----------------------------------------------------------------------------------------------------------|
| <b>U211.00</b> | [X]Intentional self-harm by hanging/strangulation/suffocation occurrence at residential institution      |
| <b>U21y.00</b> | [X]Intentional self-harm by hanging/strangulation/suffocation other specified place                      |
| <b>U21z.00</b> | [X]Intentional self-harm by hanging/strangulation/suffocation unspecified place                          |
| <b>U22.00</b>  | [X]Intentional self-harm by drowning and submersion                                                      |
| <b>U221.0</b>  | [X]Intentional self-harm by drowning/submersion occurrence at residential institution                    |
| <b>U22y.00</b> | [X]Intentional self-harm by drowning/submersion occurrence at other specified place                      |
| <b>U22z.00</b> | [X]Intentional self-harm by drowning/submersion occurrence at unspecified place                          |
| <b>U24.00</b>  | [X]Intentional self-harm by rifle shotgun/larger firearm discharge                                       |
| <b>U241.00</b> | [X]Intentional self-harm by rifle shotgun/larger firearm discharge occurrence at residential institution |
| <b>U242.00</b> | [X]Intentional self-harm by rifle shotgun/larger firearm discharge in school/public admin area           |
| <b>U25.00</b>  | [X]Intentional self-harm by other/unspecified firearm discharge                                          |
| <b>U250.00</b> | [X]Intentional self-harm other/unspecif firearm discharge occurrence at home                             |
| <b>U26.00</b>  | [X]Intentional self-harm by explosive material                                                           |
| <b>U27.00</b>  | [X]Intentional self-harm by smoke                                                                        |
| <b>U270.00</b> | [X]Intentional self-harm by smoke fire/flames occurrence at home                                         |
| <b>U274.00</b> | [X]Intentional self-harm by smoke fire/flame occurrence in street/highway                                |
| <b>U27z.00</b> | [X]Intentional self-harm by smoke fire/flames occurrence in unspecified place                            |
| <b>U28.00</b>  | [X]Intentional self-harm by steam hot vapours/hot objects                                                |
| <b>U280.00</b> | [X]Intentional self-harm by steam hot vapours/hot objects occurrence at home                             |
| <b>U28z.00</b> | [X]Intentional self-harm by steam hot vapours/hot objects occurrence in unspecified place                |
| <b>U29.00</b>  | [X]Intentional self-harm by sharp object                                                                 |
| <b>U290.00</b> | [X]Intentional self-harm by sharp object occurrence at home                                              |
| <b>U291.00</b> | [X]Intentional self-harm by sharp object occurrence at residential institution                           |
| <b>U294.00</b> | [X]Intentional self-harm by sharp object occurrence in street/highway                                    |
| <b>U29y.00</b> | [X]Intentional self-harm by sharp object occurrence at other specified place                             |
| <b>U29z.00</b> | [X]Intentional self-harm by sharp object occurrence at unspecified place                                 |
| <b>U2A.00</b>  | [X]Intentional self-harm by blunt object                                                                 |
| <b>U2A0.00</b> | [X]Intentional self-harm by blunt object occurrence at home                                              |
| <b>U2A1.00</b> | [X]Intentional self-harm by blunt object occurrence at residential institution                           |
| <b>U2A3.00</b> | [X]Intentional self-harm by blunt object occurrence at sports/athletic area                              |
| <b>U2B.00</b>  | [X]Intentional self-harm by jumping from a high place                                                    |
| <b>U2B0.00</b> | [X]Intentional self-harm by jumping from high place occurrence at home                                   |
| <b>U2B4.00</b> | [X]Intentional self-harm by jumping from high place occurring in street/highway                          |
| <b>U2B6.00</b> | [X]Intentional self-harm by jumping from high place industrial/construction area                         |



|                |                                                                                                        |
|----------------|--------------------------------------------------------------------------------------------------------|
| <b>U2By.00</b> | [X]Intentional self-harm by jumping from high place occurrence other specified place                   |
| <b>U2Bz.0</b>  | 0                                                                                                      |
| <b>U2C.00</b>  | [X]Intentional self-harm by jumping/lying before moving object                                         |
| <b>U2C1.00</b> | [X]Intentional self-harm by jumping/lying before moving object occurrence at residential institution   |
| <b>U2C4.00</b> | [X]Intentional self-harm by jumping/lying before moving object occurrence in street/highway            |
| <b>U2Cy.00</b> | [X]Intentional self-harm by jumping/lying before moving object occurrence other specified place        |
| <b>U2D.00</b>  | [X]Intentional self-harm by crashing of motor vehicle                                                  |
| <b>U2D0.00</b> | [X]Intentional self-harm by crashing of motor vehicle occurrence at home                               |
| <b>U2D4.00</b> | [X]Intentional self-harm by crashing of motor vehicle occurrence in street/highway                     |
| <b>U2D6.00</b> | [X]Intentional self-harm by crashing of motor vehicle occurrence industrial/construction area          |
| <b>U2E.00</b>  | <b>[X]Self-mutilation</b>                                                                              |
| <b>U2y.00</b>  | [X]Intentional self-harm by other specified means                                                      |
| <b>U2y0.00</b> | [X]Intentional self-harm by other specified means occurrence at home                                   |
| <b>U2y1.00</b> | [X]Intentional self-harm by other specified means occurrence at residential institution                |
| <b>U2yz.00</b> | [X]Intentional self-harm by other specif means occurrence at unspecified place                         |
| <b>U2z.00</b>  | [X]Intentional self-harm by unspecified means                                                          |
| <b>U2z0.00</b> | [X]Intentional self-harm by unspecified means occurrence at home                                       |
| <b>U2z2.00</b> | [X]Intentional self-harm by unspecified means occurrence school/institution/public administrative area |
| <b>U2zy.00</b> | [X]Intentional self-harm by unspecified means occurrence other specified place                         |
| <b>U2zz.00</b> | [X]Intentional self-harm by unspecified means occurrence at unspecified place                          |
| <b>U30.11</b>  | [X]Deliberate drug poisoning                                                                           |
| <b>U41.00</b>  | [X]Hanging strangulation + suffocation undetermined intent                                             |
| <b>U44.00</b>  | [X]Rifle shotgun + larger firearm discharge undetermined intent                                        |
| <b>U45.00</b>  | [X]Other + unspecified firearm discharge undetermined intent                                           |
| <b>U4B.00</b>  | [X]Falling jumping/pushed from high place undetermine intent                                           |
| <b>U4Bz.00</b> | [X]Fall jump/push from high place undetermine intent occurring at unspecified place                    |
| <b>U72.00</b>  | [X]Sequelae of intentional self-harm assault + event of undetermined intent                            |
| <b>U720.00</b> | [X]Sequelae of intentional self-harm                                                                   |
| <b>ZRLfc12</b> | Health of the Nation Outcome Scales item 2 “ nonaccidental self-injury                                 |
| <b>ZX..00</b>  | Self-harm                                                                                              |
| <b>ZX..11</b>  | Self-damage                                                                                            |
| <b>ZX1.00</b>  | Self-injurious behaviour                                                                               |
| <b>ZX1.12</b>  | SIB “ self-injurious behaviour                                                                         |
| <b>ZX1.13</b>  | Deliberate self-harm                                                                                   |
| <b>ZX11.00</b> | Biting self                                                                                            |

|    |                   |                                                                                                                                                   |
|----|-------------------|---------------------------------------------------------------------------------------------------------------------------------------------------|
| 1  | <b>ZX11.11</b>    | Bites self                                                                                                                                        |
| 2  | <b>ZX12.00</b>    | Burning self                                                                                                                                      |
| 3  | <b>ZX13.00</b>    | Cutting self                                                                                                                                      |
| 4  | <b>ZX13.11</b>    | Cuts self                                                                                                                                         |
| 5  | <b>ZX15.00</b>    | Drowning self                                                                                                                                     |
| 6  | <b>ZX18.00</b>    | Hanging self                                                                                                                                      |
| 7  | <b>ZX19.00</b>    | Hitting self                                                                                                                                      |
| 8  | <b>ZX19100</b>    | Punching self                                                                                                                                     |
| 9  | <b>ZX19200</b>    | Slapping self                                                                                                                                     |
| 10 | <b>ZX1B.00</b>    | Jumping from height                                                                                                                               |
| 11 | <b>ZX1B100</b>    | Jumping from building                                                                                                                             |
| 12 | <b>ZX1B200</b>    | Jumping from bridge                                                                                                                               |
| 13 | <b>ZX1B300</b>    | Jumping from cliff                                                                                                                                |
| 14 | <b>ZX1C.00</b>    | Nipping self                                                                                                                                      |
| 15 | <b>ZX1E.00</b>    | Pinching self                                                                                                                                     |
| 16 | <b>ZX1G.00</b>    | Scratches self                                                                                                                                    |
| 17 | <b>ZX1H.00</b>    | Self-asphyxiation                                                                                                                                 |
| 18 | <b>ZX1H100</b>    | Self-strangulation                                                                                                                                |
| 19 | <b>ZX1H200</b>    | Self-suffocation                                                                                                                                  |
| 20 | <b>ZX1I.00</b>    | Self-scalding                                                                                                                                     |
| 21 | <b>ZX1J.00</b>    | Self-electrocution                                                                                                                                |
| 22 | <b>ZX1K.00</b>    | Self-incineration                                                                                                                                 |
| 23 | <b>ZX1K.11</b>    | Setting fire to self                                                                                                                              |
| 24 | <b>ZX1K.12</b>    | Setting self alight                                                                                                                               |
| 25 | <b>ZX1L.00</b>    | Self-mutilation                                                                                                                                   |
| 26 | <b>ZX1L100</b>    | Self-mutilation of hands                                                                                                                          |
| 27 | <b>ZX1L200</b>    | Self-mutilation of genitalia                                                                                                                      |
| 28 | <b>ZX1L300</b>    | Self-mutilation of penis                                                                                                                          |
| 29 | <b>ZX1L600</b>    | Self-mutilation of ears                                                                                                                           |
| 30 | <b>ZX1LD00</b>    | [X]Self mutilation                                                                                                                                |
| 31 | <b>ZX1M.00</b>    | Shooting self                                                                                                                                     |
| 32 | <b>ZX1N.00</b>    | Stabbing self                                                                                                                                     |
| 33 | <b>ZX1Q.00</b>    | Throwing self in front of train                                                                                                                   |
| 34 | <b>ZX1Q.11</b>    | Jumping under train                                                                                                                               |
| 35 | <b>ZX1R.00</b>    | Throwing self in front of vehicle                                                                                                                 |
| 36 | <b>ZX1S.00</b>    | Throwing self onto floor                                                                                                                          |
| 37 |                   |                                                                                                                                                   |
| 38 |                   |                                                                                                                                                   |
| 39 |                   |                                                                                                                                                   |
| 40 |                   |                                                                                                                                                   |
| 41 |                   |                                                                                                                                                   |
| 42 |                   |                                                                                                                                                   |
| 43 |                   |                                                                                                                                                   |
| 44 |                   |                                                                                                                                                   |
| 45 |                   |                                                                                                                                                   |
| 46 |                   |                                                                                                                                                   |
| 47 |                   |                                                                                                                                                   |
| 48 |                   |                                                                                                                                                   |
| 49 |                   |                                                                                                                                                   |
| 50 |                   |                                                                                                                                                   |
| 51 | <b>ICD-10code</b> | <b>Description</b>                                                                                                                                |
| 52 | <b>X60</b>        | Intentional self-poisoning by and exposure to nonopioid analgesics, antipyretics and antirheumatics                                               |
| 53 | <b>X61</b>        | Intentional self-poisoning by and exposure to antiepileptic, sedative-hypnotic, antiparkinsonism and psychotropic drugs, not elsewhere classified |
| 54 | <b>X62</b>        | Intentional self-poisoning by and exposure to narcotics and psychodysleptics                                                                      |

|            |                                                                                                                                                       |
|------------|-------------------------------------------------------------------------------------------------------------------------------------------------------|
|            | [hallucinogens], not elsewhere classified                                                                                                             |
| <b>X63</b> | Intentional self-poisoning by and exposure to other drugs acting on the autonomic nervous system                                                      |
| <b>X64</b> | Intentional self-poisoning by and exposure to other and unspecified drugs, medicaments and biological substances                                      |
| <b>X65</b> | Intentional self-poisoning by and exposure to alcohol                                                                                                 |
| <b>X66</b> | Intentional self-poisoning by and exposure to organic solvents and halogenated hydrocarbons and their vapours                                         |
| <b>X67</b> | Intentional self-poisoning by and exposure to other gases and vapours                                                                                 |
| <b>X68</b> | Intentional self-poisoning by and exposure to pesticides                                                                                              |
| <b>X69</b> | Intentional self-poisoning by and exposure to other and unspecified chemicals and noxious substances                                                  |
| <b>X70</b> | Intentional self-harm by hanging, strangulation and suffocation                                                                                       |
| <b>X71</b> | Intentional self-harm by drowning and submersion                                                                                                      |
| <b>X72</b> | Intentional self-harm by handgun discharge                                                                                                            |
| <b>X73</b> | Intentional self-harm by rifle, shotgun and larger firearm discharge                                                                                  |
| <b>X74</b> | Intentional self-harm by other and unspecified firearm discharge                                                                                      |
| <b>X75</b> | Intentional self-harm by explosive material                                                                                                           |
| <b>X76</b> | Intentional self-harm by smoke, fire and flames                                                                                                       |
| <b>X77</b> | Intentional self-harm by steam, hot vapours and hot objects                                                                                           |
| <b>X78</b> | Intentional self-harm by sharp object                                                                                                                 |
| <b>X79</b> | Intentional self-harm by blunt object                                                                                                                 |
| <b>X80</b> | Intentional self-harm by jumping from a high place                                                                                                    |
| <b>X81</b> | Intentional self-harm by jumping or lying before moving object                                                                                        |
| <b>X82</b> | Intentional self-harm by crashing of motor vehicle                                                                                                    |
| <b>X83</b> | Intentional self-harm by other specified means                                                                                                        |
| <b>X84</b> | Intentional self-harm by unspecified means                                                                                                            |
| <b>Y10</b> | Poisoning by and exposure to nonopioid analgesics, antipyretics and antirheumatics, undetermined intent                                               |
| <b>Y11</b> | Poisoning by and exposure to antiepileptic, sedative-hypnotic, antiparkinsonism and psychotropic drugs, not elsewhere classified, undetermined intent |
| <b>Y12</b> | Poisoning by and exposure to narcotics and psychodysleptics [hallucinogens], not elsewhere classified, undetermined intent                            |
| <b>Y13</b> | Poisoning by and exposure to other drugs acting on the autonomic nervous system, undetermined intent                                                  |
| <b>Y14</b> | Poisoning by and exposure to other and unspecified drugs, medicaments and biological substances, undetermined intent                                  |
| <b>Y15</b> | Poisoning by and exposure to alcohol, undetermined intent                                                                                             |
| <b>Y16</b> | Poisoning by and exposure to organic solvents and halogenated hydrocarbons and their vapours, undetermined intent                                     |
| <b>Y17</b> | Poisoning by and exposure to other gases and vapours, undetermined intent                                                                             |
| <b>Y18</b> | Poisoning by and exposure to pesticides, undetermined intent                                                                                          |
| <b>Y19</b> | Poisoning by and exposure to other and unspecified chemicals and noxious substances, undetermined intent                                              |
| <b>Y20</b> | Hanging, strangulation and suffocation, undetermined intent                                                                                           |

|    |            |                                                                             |
|----|------------|-----------------------------------------------------------------------------|
| 1  | <b>Y21</b> | Drowning and submersion, undetermined intent                                |
| 2  | <b>Y22</b> | Handgun discharge, undetermined intent                                      |
| 3  | <b>Y23</b> | Rifle, shotgun and larger firearm discharge, undetermined intent            |
| 4  | <b>Y24</b> | Other and unspecified firearm discharge, undetermined intent                |
| 5  | <b>Y25</b> | Contact with explosive material, undetermined intent                        |
| 6  | <b>Y26</b> | Exposure to smoke, fire and flames, undetermined intent                     |
| 7  | <b>Y27</b> | Contact with steam, hot vapours and hot objects, undetermined intent        |
| 8  | <b>Y28</b> | Contact with sharp object, undetermined intent                              |
| 9  | <b>Y29</b> | Contact with blunt object, undetermined intent                              |
| 10 | <b>Y30</b> | Falling, jumping or pushed from a high place, undetermined intent           |
| 11 | <b>Y31</b> | Falling, lying or running before or into moving object, undetermined intent |
| 12 | <b>Y32</b> | Crashing of motor vehicle, undetermined intent                              |
| 13 | <b>Y33</b> | Other specified events, undetermined intent                                 |
| 14 | <b>Y34</b> | Unspecified event, undetermined intent                                      |

### Appendix C. Covariates Forced into the High Density Propensity Score

|    |                                                                                                                                          |
|----|------------------------------------------------------------------------------------------------------------------------------------------|
| 23 | <b>All covariates assessed in the 365 days prior to study index date</b>                                                                 |
| 24 | Age at index date                                                                                                                        |
| 25 | Alcohol Abuse [Never, Former, Current, Unknown]                                                                                          |
| 26 | BMI                                                                                                                                      |
| 27 | Duration of treated diabetes [time between first oral antidiabetic drug and study index date]                                            |
| 28 | History of:                                                                                                                              |
| 29 | Cirrhosis                                                                                                                                |
| 30 | Congestive heart failure                                                                                                                 |
| 31 | Hypertension                                                                                                                             |
| 32 | Hyperlipidemia                                                                                                                           |
| 33 | Ischemic heart disease                                                                                                                   |
| 34 | Peripheral heart disease                                                                                                                 |
| 35 | Number of hospitalizations                                                                                                               |
| 36 | Most recent HbA1c value to index date                                                                                                    |
| 37 | Number of distinct prescription drugs                                                                                                    |
| 38 | Prior use of benzodiazepines or other hypnotics, antipsychotics, levothyroxine or triiodothyronine, anticonvulsants, or mood stabilizers |
| 39 | Sex                                                                                                                                      |
| 40 | Smoking status [Never, Former, Current, Unknown]                                                                                         |
| 41 | Socioeconomic status [quintiles of Index of Multiple Deprivation]                                                                        |
| 42 | Use of other antidiabetic agents                                                                                                         |
| 43 | Year of cohort entry                                                                                                                     |

**Appendix D. Measures of frequency and association for depression among DPP-4 inhibitor and GLP-1 receptor agonist cohorts**

|                                             | DPP4i               | SU                  | GLP1ra              | SU                  |
|---------------------------------------------|---------------------|---------------------|---------------------|---------------------|
| Number of patients                          | 6207                | 22218               | 502                 | 16728               |
| Person-years follow-up                      | 5591                | 18683               | 549                 | 13628               |
| Number of events                            | 45                  | 215                 | 10                  | 182                 |
| Incidence per 1000 person-years<br>(95% CI) | 8.0<br>(6.0-10.8)   | 11.5<br>(10.1-13.2) | 18.2<br>(10-33.5)   | 13.4<br>(11.6-15.4) |
| Crude Hazard Ratio<br>(95% CI)              | 0.70<br>(0.50-0.96) | -ref-               | 1.39<br>(0.74-2.63) | -ref-               |
| Adjusted Hazard Ratio<br>(95% CI)           | 0.81<br>(0.57-1.14) | -ref-               | 1.22<br>(0.61-2.42) | -ref-               |

**S = suppressed due to low number of events**

**Appendix E. Measures of frequency and association for self-harm among DPP-4 inhibitor and GLP-1 receptor agonist cohorts**

|                                             | DPP4i               | SU               | GLP1ra | SU    |
|---------------------------------------------|---------------------|------------------|--------|-------|
| Number of patients                          | 6211                | 22180            | 502    | 16632 |
| Person-years follow-up                      | 5632                | 18839            | 563    | 13696 |
| Number of events                            | S                   | 5                | S      | S     |
| Incidence per 1000 person-years<br>(95% CI) | S                   | 0.3<br>(0.1-0.6) | S      | S     |
| Crude Hazard Ratio<br>(95% CI)              | 0.66<br>(0.08-5.69) | -ref-            | S      | -ref- |
| Adjusted Hazard Ratio<br>(95% CI)           | 0.77<br>(0.07-8.21) | -ref-            | S      | -ref- |

**S = suppressed due to low number of events**

**Appendix F. Measures of frequency and association for depression or self-harm among DPP-4 inhibitor and GLP-1 receptor agonist cohorts when patients are matched 1:1 by propensity score.**

|                                             | DPP4i               | SU                 | GLP1ra              | SU                 |
|---------------------------------------------|---------------------|--------------------|---------------------|--------------------|
| Number of patients                          | 6008                | 6008               | 488                 | 488                |
| Person-years follow-up                      | 548                 | 4488               | 529                 | 349                |
| Number of events                            | 44                  | 49                 | 10                  | 7                  |
| Incidence per 1000 person-years<br>(95% CI) | 8.0<br>(6-10.8)     | 10.9<br>(8.3-14.4) | 18.9<br>(10.4-34.8) | 20.1<br>(9.9-41.3) |
| Crude Hazard Ratio<br>(95% CI)              | 0.75<br>(0.50-1.13) | -ref-              | 0.99<br>(0.37-2.61) | -ref-              |
| Adjusted Hazard Ratio<br>(95% CI)           | 0.77<br>(0.51-1.16) | -ref-              | 0.98<br>(0.36-2.61) | -ref-              |

**Appendix G. Measures of frequency and association for depression or self-harm among DPP-4 inhibitor and GLP-1 receptor agonist cohorts when patients are adjusted for pattern of glucose-lowering therapy.**

|                                                    | <b>DPP4i</b>        | <b>SU</b>          | <b>GLP1RA</b>       | <b>SU</b>           |
|----------------------------------------------------|---------------------|--------------------|---------------------|---------------------|
| <b>Number of patients</b>                          | 4416                | 15943              | 117                 | 4165                |
| <b>Person-years follow-up</b>                      | 3743                | 12614              | 90                  | 3327                |
| <b>Number of events</b>                            | 36                  | 140                | S                   | 61                  |
| <b>Incidence per 1000 person-years<br/>(95%CI)</b> | 9.6<br>(7-13.3)     | 11.1<br>(9.4-13.1) | 33.4<br>(12.1-97.5) | 18.3<br>(14.3-23.6) |
| <b>Crude Hazard Ratio<br/>(95% CI)</b>             | 0.86<br>(0.60-1.24) | -ref-              | 1.82<br>(0.57-5.80) | -ref-               |
| <b>Adjusted Hazard Ratio<br/>(95% CI)</b>          | 1.00<br>(0.66-1.49) | -ref-              | 1.55<br>(0.46-5.18) | -ref-               |

**S = suppressed due to low number of events**

**Appendix H. Measures of frequency and association for depression or self-harm among DPP-4 inhibitor and GLP-1 receptor agonist cohorts when patients are restricted to only those with HES/ONS linked data.**

|                                                    | <b>DPP4i</b>        | <b>SU</b>           | <b>GLP1ra</b>       | <b>SU</b>         |
|----------------------------------------------------|---------------------|---------------------|---------------------|-------------------|
| <b>Number of patients</b>                          | 3348                | 13243               | 262                 | 9997              |
| <b>Person-years follow-up</b>                      | 2841                | 10762               | 290                 | 7904              |
| <b>Number of events</b>                            | 27                  | 132                 | S                   | 111               |
| <b>Incidence per 1000 person-years<br/>(95%CI)</b> | 9.5<br>(6.5-13.8)   | 12.3<br>(10.3-14.5) | 13.8<br>(5.6-35.3)  | 14<br>(11.7-16.9) |
| <b>Crude Hazard Ratio<br/>(95% CI)</b>             | 0.78<br>(0.51-1.17) | -ref-               | 1.00<br>(0.37-2.72) | -ref-             |
| <b>Adjusted Hazard Ratio<br/>(95% CI)</b>          | 0.99<br>(0.63-1.55) | -ref-               | 0.93<br>(0.32-2.71) | -ref-             |

**Appendix I. Measures of frequency and association for depression or self-harm among DPP-4 inhibitor and GLP-1 receptor agonist cohorts when patients are restricted to second-line therapy after metformin monotherapy.**

|                                                    | <b>DPP4i</b>        | <b>SU</b>           | <b>GLP1ra</b>    | <b>SU</b>         |
|----------------------------------------------------|---------------------|---------------------|------------------|-------------------|
| <b>Number of patients</b>                          | 1255                | 4612                | 65               | 2112              |
| <b>Person-years follow-up</b>                      | 1191                | 3601                | 47               | 1680              |
| <b>Number of events</b>                            | 11                  | 48                  | S                | 29                |
| <b>Incidence per 1000 person-years<br/>(95%CI)</b> | 9.2<br>(5.2-16.5)   | 13.3<br>(10.1-17.7) | 43(13.3-155.3)   | 17.3<br>(12-24.8) |
| <b>Crude Hazard Ratio<br/>(95% CI)</b>             | 0.71<br>(0.37-1.38) | -ref-               | 2.49(0.59-10.45) | -ref-             |
| <b>Adjusted Hazard Ratio<br/>(95% CI)</b>          | 0.67<br>(0.34-1.34) | -ref-               | 1.92(0.44-8.31)  | -ref-             |

**S = suppressed due to low number of events**

**Appendix J. Measures of frequency and association for depression or self-harm among DPP-4 inhibitor and GLP-1 receptor agonist cohorts when BMI categories (in addition to hdps deciles) were added to the Cox proportional regression model.**

|                                            | DPP4i               | SU                  | GLP1ra              | SU                  |
|--------------------------------------------|---------------------|---------------------|---------------------|---------------------|
| Number of patients                         | 6206                | 22128               | 501                 | 16409               |
| Person-years follow-up                     | 5589                | 18596               | 549                 | 13418               |
| Number of events                           | 46                  | 218                 | 10                  | 183                 |
| Incidence per 1000 person-years<br>(95%CI) | 8.2<br>(6.2-11)     | 11.7<br>(10.3-13.4) | 18.2<br>(10-33.5)   | 13.6<br>(11.8-15.8) |
| Crude Hazard Ratio<br>(95% CI)             | 0.70<br>(0.51-0.96) | -ref-               | 1.36<br>(0.72-2.58) | -ref-               |
| Adjusted Hazard Ratio<br>(95% CI)          | 0.81<br>(0.58-1.15) | -ref-               | 1.25<br>(0.63-2.51) | -ref-               |

S = suppressed due to low number of events

**Appendix K. Time-dependent Cox regression for DPP-4 inhibitor monotherapy and combination therapies Vs. Sulfonylurea (SU) monotherapy**

| Exposure vs. SU monotherapy | Coef  | *Adjusted HR | Lower .95 | Upper .95 | Se (coef) | Pr (> z ) |
|-----------------------------|-------|--------------|-----------|-----------|-----------|-----------|
| DPP-4i monotherapy          | -0.07 | 0.93         | 0.65      | 1.32      | 0.18      | 0.69      |
| DPP-4i/SU                   | -0.53 | 0.59         | 0.34      | 1.02      | 0.28      | 0.06      |
| DPP-4i/Other                | -0.16 | 0.85         | 0.70      | 1.04      | 0.10      | 0.11      |
| DPP-4i/SU/Other             | -0.13 | 0.88         | 0.68      | 1.14      | 0.13      | 0.33      |

\*Adjusted for deciles of hdps

**Appendix L. Time-dependent Cox regression for GLP-1 receptor agonist (GLP1ra) monotherapy and combination therapies Vs. Sulfonylurea (SU) monotherapy**

| Exposure vs. SU monotherapy | Coef  | *Adjusted HR | Lower .95 | Upper .95 | Se (coef) | Pr (> z ) |
|-----------------------------|-------|--------------|-----------|-----------|-----------|-----------|
| GLP1ra monotherapy          | -0.51 | 0.60         | 0.30      | 1.21      | 0.36      | 0.15      |
| GLP1ra /SU                  | 0.45  | 1.57         | 0.78      | 3.18      | 0.36      | 0.21      |
| GLP1ra /Other               | 0.14  | 1.16         | 0.88      | 1.52      | 0.14      | 0.31      |
| GLP1ra /SU/Other            | -0.31 | 0.73         | 0.47      | 1.15      | 0.23      | 0.18      |

\*Adjusted for deciles of hdps



STROBE Statement—Checklist of items that should be included in reports of *cohort studies*

|                              | Item No | Recommendation                                                                                                                                                                                                                                                                                                                                                         |
|------------------------------|---------|------------------------------------------------------------------------------------------------------------------------------------------------------------------------------------------------------------------------------------------------------------------------------------------------------------------------------------------------------------------------|
| <b>Title and abstract</b>    | 1       | (a) Indicate the study's design with a commonly used term in the title or the abstract<br><b>Cohort in title</b><br>(b) Provide in the abstract an informative and balanced summary of what was done and what was found<br><b>Structured abstract provided</b>                                                                                                         |
| <b>Introduction</b>          |         |                                                                                                                                                                                                                                                                                                                                                                        |
| Background/rationale         | 2       | Explain the scientific background and rationale for the investigation being reported<br><b>Introduction – paragraphs 1 and 2</b>                                                                                                                                                                                                                                       |
| Objectives                   | 3       | State specific objectives, including any prespecified hypotheses<br><b>Introduction – paragraph 3</b>                                                                                                                                                                                                                                                                  |
| <b>Methods</b>               |         |                                                                                                                                                                                                                                                                                                                                                                        |
| Study design                 | 4       | Present key elements of study design early in the paper<br><b>Methods, Study Design and Data Sources section, paragraph 1</b>                                                                                                                                                                                                                                          |
| Setting                      | 5       | Describe the setting, locations, and relevant dates, including periods of recruitment, exposure, follow-up, and data collection<br><b>Methods, Study Design and Data Sources section, paragraph 1</b>                                                                                                                                                                  |
| Participants                 | 6       | (a) Give the eligibility criteria, and the sources and methods of selection of participants. Describe methods of follow-up<br><b>Methods, Study Cohort section, paragraph 1</b><br>(b) For matched studies, give matching criteria and number of exposed and unexposed                                                                                                 |
| Variables                    | 7       | Clearly define all outcomes, exposures, predictors, potential confounders, and effect modifiers. Give diagnostic criteria, if applicable<br><b>Methods, Exposure and Outcome Definitions section</b>                                                                                                                                                                   |
| Data sources/<br>measurement | 8*      | For each variable of interest, give sources of data and details of methods of assessment (measurement). Describe comparability of assessment methods if there is more than one group<br><b>Methods, Exposure and Outcome Definitions section</b><br><b>Supplemental appendix</b>                                                                                       |
| Bias                         | 9       | Describe any efforts to address potential sources of bias<br><b>Methods, Statistical Analysis section, paragraphs 2 and 3</b>                                                                                                                                                                                                                                          |
| Study size                   | 10      | Explain how the study size was arrived at<br><b>Figure 1</b>                                                                                                                                                                                                                                                                                                           |
| Quantitative variables       | 11      | Explain how quantitative variables were handled in the analyses. If applicable, describe which groupings were chosen and why<br><b>Methods, Exposure and Outcome Definitions section</b><br><b>Methods, Statistical Analysis section</b>                                                                                                                               |
| Statistical methods          | 12      | (a) Describe all statistical methods, including those used to control for confounding<br>(b) Describe any methods used to examine subgroups and interactions<br>(c) Explain how missing data were addressed<br>(d) If applicable, explain how loss to follow-up was addressed<br>(e) Describe any sensitivity analyses<br><b>Methods, Statistical Analysis section</b> |
| <b>Results</b>               |         |                                                                                                                                                                                                                                                                                                                                                                        |
| Participants                 | 13*     | (a) Report numbers of individuals at each stage of study—eg numbers potentially                                                                                                                                                                                                                                                                                        |

|                          |     |                                                                                                                                                                                                              |
|--------------------------|-----|--------------------------------------------------------------------------------------------------------------------------------------------------------------------------------------------------------------|
|                          |     | eligible, examined for eligibility, confirmed eligible, included in the study, completing follow-up, and analysed                                                                                            |
|                          |     | (b) Give reasons for non-participation at each stage                                                                                                                                                         |
|                          |     | (c) Consider use of a flow diagram                                                                                                                                                                           |
|                          |     | <b>Figure 1 is a flow diagram</b>                                                                                                                                                                            |
| Descriptive data         | 14* | (a) Give characteristics of study participants (eg demographic, clinical, social) and information on exposures and potential confounders                                                                     |
|                          |     | (b) Indicate number of participants with missing data for each variable of interest                                                                                                                          |
|                          |     | (c) Summarise follow-up time (eg, average and total amount)                                                                                                                                                  |
|                          |     | <b>Table 3</b>                                                                                                                                                                                               |
|                          |     | <b>Results section</b>                                                                                                                                                                                       |
| Outcome data             | 15* | Report numbers of outcome events or summary measures over time                                                                                                                                               |
|                          |     | <b>Table 3</b>                                                                                                                                                                                               |
|                          |     | <b>Results section</b>                                                                                                                                                                                       |
|                          |     | <b>Supplemental appendix</b>                                                                                                                                                                                 |
| Main results             | 16  | (a) Give unadjusted estimates and, if applicable, confounder-adjusted estimates and their precision (eg, 95% confidence interval). Make clear which confounders were adjusted for and why they were included |
|                          |     | (b) Report category boundaries when continuous variables were categorized                                                                                                                                    |
|                          |     | (c) If relevant, consider translating estimates of relative risk into absolute risk for a meaningful time period                                                                                             |
|                          |     | <b>Results section</b>                                                                                                                                                                                       |
|                          |     | <b>Table 3</b>                                                                                                                                                                                               |
| Other analyses           | 17  | Report other analyses done—eg analyses of subgroups and interactions, and sensitivity analyses                                                                                                               |
|                          |     | <b>Results section, paragraph 5</b>                                                                                                                                                                          |
|                          |     | <b>Figure 2</b>                                                                                                                                                                                              |
|                          |     | <b>Figure 3</b>                                                                                                                                                                                              |
|                          |     | <b>Supplemental appendix</b>                                                                                                                                                                                 |
| <b>Discussion</b>        |     |                                                                                                                                                                                                              |
| Key results              | 18  | Summarise key results with reference to study objectives                                                                                                                                                     |
|                          |     | <b>Discussion section, paragraph 1</b>                                                                                                                                                                       |
| Limitations              | 19  | Discuss limitations of the study, taking into account sources of potential bias or imprecision. Discuss both direction and magnitude of any potential bias                                                   |
|                          |     | <b>Discussion section, paragraph 5</b>                                                                                                                                                                       |
| Interpretation           | 20  | Give a cautious overall interpretation of results considering objectives, limitations, multiplicity of analyses, results from similar studies, and other relevant evidence                                   |
|                          |     | <b>Discussion section, final paragraph</b>                                                                                                                                                                   |
| Generalisability         | 21  | Discuss the generalisability (external validity) of the study results                                                                                                                                        |
| <b>Other information</b> |     |                                                                                                                                                                                                              |
| Funding                  | 22  | Give the source of funding and the role of the funders for the present study and, if applicable, for the original study on which the present article is based                                                |
|                          |     | <b>Funding support</b>                                                                                                                                                                                       |

\*Give information separately for exposed and unexposed groups.

**Note:** An Explanation and Elaboration article discusses each checklist item and gives methodological background and published examples of transparent reporting. The STROBE checklist is best used in conjunction with this article (freely available on the Web sites of PLoS Medicine at <http://www.plosmedicine.org/>, Annals of Internal Medicine at

1 <http://www.annals.org/>, and *Epidemiology* at <http://www.epidem.com/>). Information on the STROBE Initiative is  
2 available at <http://www.strobe-statement.org>.  
3  
4  
5  
6  
7  
8  
9  
10  
11  
12  
13  
14  
15  
16  
17  
18  
19  
20  
21  
22  
23  
24  
25  
26  
27  
28  
29  
30  
31  
32  
33  
34  
35  
36  
37  
38  
39  
40  
41  
42  
43  
44  
45  
46  
47  
48  
49  
50  
51  
52  
53  
54  
55  
56  
57  
58  
59  
60

For peer review only
