# Supplementary material for: Examining the risk of depression or self-harm associated with incretin-based therapies used to manage hyperglycaemia in patients with type 2 diabetes: a cohort study using the UK Clinical Practice Research Datalink
Source: PubMed Central journal article supplement — BMJ Open. 2018 Oct 8;8(10):e023830. doi: 10.1136/bmjopen-2018-023830 (PMC6194463; doi:10.1136/bmjopen-2018-023830), 2018-10-08
Supplement: bmjopen-2018-023830supp001.pdf [file bmjopen-2018-023830supp001.pdf]

## Supplementary Material

### Appendix A: READ and ICD-10 Codes Used to Identify Depression

| READ Code      | Description                                                                              |
|----------------|------------------------------------------------------------------------------------------|
| <b>3004a</b>   | Depression                                                                               |
| <b>E2b..00</b> | Depressive Disorder Nec                                                                  |
| <b>E204.00</b> | Neurotic Depression Reactive Type                                                        |
| <b>1b17.00</b> | Depressed                                                                                |
| <b>Eu32z11</b> | [X]Depression Nos                                                                        |
| <b>3004am</b>  | Mood Depressed                                                                           |
| <b>3004er</b>  | Reactive Depression                                                                      |
| <b>1b17.11</b> | C/O - Feeling Depressed                                                                  |
| <b>3004l</b>   | Looking Depressed                                                                        |
| <b>E112.14</b> | Endogenous Depression                                                                    |
| <b>E112.11</b> | Agitated Depression                                                                      |
| <b>2960ad</b>  | Depression Agitated                                                                      |
| <b>E204.11</b> | Postnatal Depression                                                                     |
| <b>E135.00</b> | Agitated Depression                                                                      |
|                |                                                                                          |
| ICD-10 Code    | Definition                                                                               |
| <b>F20.4</b>   | post-schizophrenic depression                                                            |
| <b>F31.3</b>   | Bipolar affective disorder, current episode mild or moderate depression                  |
| <b>F31.4</b>   | Bipolar affective disorder, current episode severe depression without psychotic symptoms |
| <b>F31.5</b>   | Bipolar affective disorder, current episode severe depression with psychotic symptoms    |
| <b>F31.6</b>   | Bipolar affective disorder, current episode mixed                                        |
| <b>F32.0</b>   | Mild depressive episode                                                                  |
| <b>F32.1</b>   | Moderate depressive episode                                                              |
| <b>F32.2</b>   | Severe depressive episode without psychotic symptoms                                     |
| <b>F32.3</b>   | Severe depressive episode with psychotic symptoms                                        |
| <b>F32.4</b>   | Depressive disorder, single episode in partial remission                                 |
| <b>F32.5</b>   | Depressive disorder, single episode in full remission                                    |
| <b>F32.8</b>   | Other depressive episodes                                                                |
| <b>F32.9</b>   | Depressive episode, unspecified                                                          |
| <b>F33.0</b>   | Recurrent depressive disorder, current episode                                           |

|              |                                                                                  |
|--------------|----------------------------------------------------------------------------------|
|              | mild                                                                             |
| <b>F33.1</b> | Recurrent depressive disorder, current episode moderate                          |
| <b>F33.2</b> | Recurrent depressive disorder, current episode severe without psychotic symptoms |
| <b>F33.3</b> | Recurrent depressive disorder, current episode severe with psychotic symptoms    |
| <b>F33.8</b> | Other recurrent depressive disorders                                             |
| <b>F33.9</b> | Recurrent depressive disorder, unspecified                                       |
| <b>F34.1</b> | Dysthymia                                                                        |
| <b>F34.8</b> | Other persistent mood [affective] disorders                                      |
| <b>F34.9</b> | Persistent mood [affective] disorder, unspecified                                |
| <b>F38.0</b> | Other single mood [affective] disorders                                          |
| <b>F38.1</b> | Other recurrent mood [affective] disorders                                       |
| <b>F38.8</b> | Other specified mood [affective] disorders                                       |
| <b>F39</b>   | Unspecified mood [affective] disorder                                            |
| <b>F41.2</b> | Mixed anxiety and depressive disorder                                            |
| <b>F99</b>   | Mental disorder, not elsewhere specified                                         |

#### Appendix B: READ and ICD-10 Codes Used to Identify Self-harm

| <b>READ Code</b> | <b>Description</b>                                              |
|------------------|-----------------------------------------------------------------|
| <b>SL..14</b>    | Overdose of biological substance                                |
| <b>SL..15</b>    | Overdose of drug                                                |
| <b>SLHz.00</b>   | Drug and medicament poisoning not otherwise specified           |
| <b>TK..00</b>    | Suicide and self-inflicted injury                               |
| <b>TK..11</b>    | Cause of overdose "deliberate                                   |
| <b>TK..12</b>    | Injury "self-inflicted                                          |
| <b>TK..13</b>    | Poisoning "self-inflicted                                       |
| <b>TK..14</b>    | Suicide and self-harm                                           |
| <b>TK..15</b>    | Attempted suicide                                               |
| <b>TK..17</b>    | Para-suicide                                                    |
| <b>TK0.00</b>    | Suicide + self-inflicted poisoning by solid/liquid substances   |
| <b>TK00.00</b>   | Suicide + self-inflicted poisoning by analgesic/antipyretic     |
| <b>TK01.00</b>   | Suicide + self-inflicted poisoning by barbiturates              |
| <b>TK01000</b>   | Suicide and self-inflicted injury by amylobarbitone             |
| <b>TK01100</b>   | Suicide and self-inflicted injury by barbitone                  |
| <b>TK01400</b>   | Suicide and self-inflicted injury by phenobarbitone             |
| <b>TK02.00</b>   | Suicide + self-inflicted poisoning by other sedatives/hypnotics |
| <b>TK03.00</b>   | Suicide + self-inflicted poisoning tranquilizer/psychotropic    |
| <b>TK04.00</b>   | Suicide + self-inflicted poisoning by other drugs/medicines     |

|                |                                                                                      |
|----------------|--------------------------------------------------------------------------------------|
| <b>TK05.00</b> | Suicide + self-inflicted poisoning by drug or medicine not otherwise specified       |
| <b>TK06.00</b> | Suicide + self-inflicted poisoning by agricultural chemical                          |
| <b>TK07.00</b> | Suicide + self-inflicted poisoning by corrosive/caustic substance                    |
| <b>TK0z.00</b> | Suicide + self-inflicted poisoning by solid/liquid substance not otherwise specified |
| <b>TK1.00</b>  | Suicide + self-inflicted poisoning by gases in domestic use                          |
| <b>TK10.00</b> | Suicide + self-inflicted poisoning by gas via pipeline                               |
| <b>TK11.00</b> | Suicide + self-inflicted poisoning by liquified petrol gas                           |
| <b>TK1y.00</b> | Suicide and self-inflicted poisoning by other utility gas                            |
| <b>TK1z.00</b> | Suicide + self-inflicted poisoning by domestic gases not otherwise specified         |
| <b>TK2.00</b>  | Suicide + self-inflicted poisoning by other gases and vapours                        |
| <b>TK20.00</b> | Suicide + self-inflicted poisoning by motor vehicle exhaust gas                      |
| <b>TK21.00</b> | Suicide and self-inflicted poisoning by other carbon monoxide                        |
| <b>TK2z.00</b> | Suicide + self-inflicted poisoning by gases and vapours not otherwise specified      |
| <b>TK3.00</b>  | Suicide + self-inflicted injury by hang/strangulate/suffocate                        |
| <b>TK30.00</b> | Suicide and self-inflicted injury by hanging                                         |
| <b>TK31.00</b> | Suicide + self-inflicted injury by suffocation by plastic bag                        |
| <b>TK3y.00</b> | Suicide + self-inflicted injury by other means than hang/strangle/suffocate          |
| <b>TK3z.00</b> | Suicide + self-inflicted injury by hang/strangle/suffocate not otherwise specified   |
| <b>TK4.00</b>  | Suicide and self-inflicted injury by drowning                                        |
| <b>TK5.00</b>  | Suicide and self-inflicted injury by firearms and explosives                         |
| <b>TK51.00</b> | Suicide and self-inflicted injury by shotgun                                         |
| <b>TK52.00</b> | Suicide and self-inflicted injury by hunting rifle                                   |
| <b>TK54.00</b> | Suicide and self-inflicted injury by other firearm                                   |
| <b>TK5z.00</b> | Suicide and self-inflicted injury by firearms/explosives not otherwise specified     |
| <b>TK6.00</b>  | Suicide and self-inflicted injury by cutting and stabbing                            |
| <b>TK60.00</b> | Suicide and self-inflicted injury by cutting                                         |
| <b>TK60100</b> | Self-inflicted lacerations to wrist                                                  |
| <b>TK60111</b> | Slashed wrists self-inflicted                                                        |
| <b>TK61.00</b> | Suicide and self-inflicted injury by stabbing                                        |
| <b>TK6z.00</b> | Suicide and self-inflicted injury by cutting and stabbing not otherwise specified    |
| <b>TK7.00</b>  | Suicide and self-inflicted injury by jumping from high place                         |
| <b>TK70.00</b> | Suicide + self-inflicted injury " jump from residential premises                     |
| <b>TK71.00</b> | Suicide + self-inflicted injury " jump from other manmade structure                  |
| <b>TK72.00</b> | Suicide + self-inflicted injury " jump from natural sites                            |
| <b>TK7z.00</b> | Suicide + self-inflicted injury " jump from high place not otherwise specified       |
| <b>TKx.00</b>  | Suicide and self-inflicted injury by other means                                     |
| <b>TKx0.00</b> | Suicide + self-inflicted injury " jump/lie before moving object                      |
| <b>TKx0000</b> | Suicide + self-inflicted injury " jumping before moving object                       |
| <b>TKx1.00</b> | Suicide and self-inflicted injury by burns or fire                                   |
| <b>TKx2.00</b> | Suicide and self-inflicted injury by scald                                           |
| <b>TKx3.00</b> | Suicide and self-inflicted injury by extremes of cold                                |

|                |                                                                               |
|----------------|-------------------------------------------------------------------------------|
| <b>TKx4.00</b> | Suicide and self-inflicted injury by electrocution                            |
| <b>TKx5.00</b> | Suicide and self-inflicted injury by crashing motor vehicle                   |
| <b>TKx6.00</b> | Suicide and self-inflicted injury by crashing of aircraft                     |
| <b>TKx7.00</b> | Suicide and self-inflicted injury caustic substance                           |
| <b>TKxy.00</b> | Suicide and self-inflicted injury by other specified means                    |
| <b>TKxz.00</b> | Suicide and self-inflicted injury by other means not otherwise specified      |
| <b>TKy.00</b>  | Late effects of self-inflicted injury                                         |
| <b>TKz.00</b>  | Suicide and self-inflicted injury not otherwise specified                     |
| <b>U2..00</b>  | [X]Intentional self-harm                                                      |
| <b>U2..11</b>  | [X]Self-inflicted injury                                                      |
| <b>U2..12</b>  | [X]Injury " self-inflicted                                                    |
| <b>U2..13</b>  | [X]Suicide                                                                    |
| <b>U2..14</b>  | [X]Attempted suicide                                                          |
| <b>U2..15</b>  | [X]Para-suicide                                                               |
| <b>U20.00</b>  | [X]Intentional self-poisoning/exposure to noxious substances                  |
| <b>U20.11</b>  | [X]Deliberate drug overdose/other poisoning                                   |
| <b>U200.00</b> | [X]Intentional self-poisoning/exposure to non-opioid analgesic                |
| <b>U200.11</b> | [X]Overdose " paracetamol                                                     |
| <b>U200.12</b> | [X]Overdose " ibuprofen                                                       |
| <b>U200.13</b> | [X]Overdose " aspirin                                                         |
| <b>U200000</b> | [X]Intentional self-poisoning/exposure to non-opioid analgesic at home        |
| <b>U200100</b> | [X]Intentional self-poisoning non-opioid analgesic at residential institution |
| <b>U200400</b> | [X]Intentional self-poisoning non-opioid analgesic in street/highway          |
| <b>U200500</b> | [X]Intentional self-poisoning non-opioid analgesic trade/service area         |
| <b>U200y00</b> | [X]Intentional self-poisoning non-opioid analgesic other specified place      |
| <b>U200z00</b> | [X]Intentional self-poisoning non-opioid analgesic unspecified place          |
| <b>U201.00</b> | [X]Intentional self-poisoning/exposure to antiepileptic                       |
| <b>U201000</b> | [X]Intentional self-poisoning/exposure to antiepileptic at home               |
| <b>U201z00</b> | [X]Intentional self-poisoning antiepileptic unspecified place                 |
| <b>U202.00</b> | [X]Intentional self-poisoning/exposure to sedative hypnotic                   |
| <b>U202.11</b> | [X]Overdose " sleeping tablets                                                |
| <b>U202.12</b> | [X]Overdose " diazepam                                                        |
| <b>U202.13</b> | [X]Overdose " temazepam                                                       |
| <b>U202.15</b> | [X]Overdose " nitrazepam                                                      |
| <b>U202.16</b> | [X]Overdose " benzodiazepine                                                  |
| <b>U202.17</b> | [X]Overdose " barbiturate                                                     |
| <b>U202.18</b> | [X]Overdose " amobarbital                                                     |
| <b>U202000</b> | [X]Intentional self-poisoning /exposure to sedative hypnotic at home          |
| <b>U202400</b> | [X]Intentional self-poisoning sedative hypnotic in street/highway             |
| <b>U202y00</b> | [X]Intentional self-poisoning sedative hypnotic other specified place         |
| <b>U202z00</b> | [X]Intentional self-poisoning sedative hypnotic unspecified place             |
| <b>U204.00</b> | [X]Intentional self-poisoning/exposure to psychotropic drug                   |
| <b>U204.11</b> | [X]Overdose " antidepressant                                                  |

|                |                                                                                                      |
|----------------|------------------------------------------------------------------------------------------------------|
| <b>U204.12</b> | [X]Overdose " amitriptyline                                                                          |
| <b>U204.13</b> | [X]Overdose " SSRI                                                                                   |
| <b>U204000</b> | [X]Intentional self-poisoning /exposure to psychotropic drug at home                                 |
| <b>U204100</b> | [X]Intentional self-poisoning psychotropic drug at residential institution                           |
| <b>U204y00</b> | [X]Intentional self-poisoning psychotropic drug other specified place                                |
| <b>U204z00</b> | [X]Intentional self-poisoning psychotropic drug unspecified place                                    |
| <b>U205000</b> | [X]Intentional self-poisoning/exposure to narcotic drug at home                                      |
| <b>U205y00</b> | [X]Intentional self-poisoning narcotic drug other specified place                                    |
| <b>U205z00</b> | [X]Intentional self-poisoning narcotic drug unspecified place                                        |
| <b>U206.00</b> | [X]Intentional self-poisoning/exposure to hallucinogen                                               |
| <b>U206400</b> | [X]Intentional self-poisoning hallucinogen in street/highway                                         |
| <b>U207.00</b> | [X]Intentional self-poisoning/exposure to other autonomic drug                                       |
| <b>U207000</b> | [X]Intentional self-poisoning/exposure to other autonomic drug at home                               |
| <b>U207z00</b> | [X]Intentional self-poisoning other autonomic drug unspecified place                                 |
| <b>U208.00</b> | [X]Intentional self-poisoning/exposure to other/unspecified drug/ medicament                         |
| <b>U208400</b> | [X]Intentional self-poisoning other/unspecified drug/medication in street/highway                    |
| <b>U208y00</b> | [X]Intentional self-poisoning other/unspecified drug/medication other specified place                |
| <b>U208z00</b> | [X]Intentional self-poisoning other/unspecified drug/medication unspecified place                    |
| <b>U20A.00</b> | [X]Intentional self-poisoning organic solvent                                                        |
| <b>U20A.11</b> | [X]Self-poisoning from glue solvent                                                                  |
| <b>U20A000</b> | "[X]Intentional self-poisoning organic solvent                                                       |
| <b>U20A400</b> | "[X]Intentional self-poisoning organic solvent                                                       |
| <b>U20Az00</b> | "[X]Intentional self-poisoning organic solvent                                                       |
| <b>U20B.00</b> | [X]Intentional self-poisoning/exposure to other gas/vapour U20B.11 [X]Self carbon monoxide poisoning |
| <b>U20B000</b> | [X]Intentional self-poisoning/exposure to other gas/vapour at home                                   |
| <b>U20B200</b> | [X]Intentional self-poisoning other gas/vapour school/public admin area                              |
| <b>U20By00</b> | [X]Intentional self-poisoning other gas/vapour other specified place                                 |
| <b>U20Bz00</b> | [X]Intentional self-poisoning other gas/vapour unspecified place                                     |
| <b>U20C.00</b> | [X]Intentional self-poisoning/exposure to pesticide                                                  |
| <b>U20C.11</b> | [X]Self-poisoning with weedkiller                                                                    |
| <b>U20C.12</b> | [X]Self-poisoning with paraquat                                                                      |
| <b>U20C000</b> | [X]Intentional self-poisoning/exposure to pesticide at home                                          |
| <b>U20Cy00</b> | [X]Intentional self-poisoning pesticide other specified place                                        |
| <b>U20y.00</b> | [X]Intentional self-poisoning/exposure to unspecified chemical                                       |
| <b>U20y000</b> | [X]Intentional self-poisoning/exposure to unspecified chemical at home                               |
| <b>U20y200</b> | [X]Intentional self-poisoning unspecified chemical school/public admin area                          |
| <b>U20yz00</b> | [X]Intentional self-poisoning unspecified chemical unspecified place                                 |
| <b>U21.00</b>  | [X]Intentional self-harm by hanging/strangulation/suffocation                                        |
| <b>U210.00</b> | [X]Intentional self-harm by hanging/strangulation/suffocation at home                                |

|                |                                                                                                          |
|----------------|----------------------------------------------------------------------------------------------------------|
| <b>U211.00</b> | [X]Intentional self-harm by hanging/strangulation/suffocation occurrence at residential institution      |
| <b>U21y.00</b> | [X]Intentional self-harm by hanging/strangulation/suffocation other specified place                      |
| <b>U21z.00</b> | [X]Intentional self-harm by hanging/strangulation/suffocation unspecified place                          |
| <b>U22.00</b>  | [X]Intentional self-harm by drowning and submersion                                                      |
| <b>U221.0</b>  | [X]Intentional self-harm by drowning/submersion occurrence at residential institution                    |
| <b>U22y.00</b> | [X]Intentional self-harm by drowning/submersion occurrence at other specified place                      |
| <b>U22z.00</b> | [X]Intentional self-harm by drowning/submersion occurrence at unspecified place                          |
| <b>U24.00</b>  | [X]Intentional self-harm by rifle shotgun/larger firearm discharge                                       |
| <b>U241.00</b> | [X]Intentional self-harm by rifle shotgun/larger firearm discharge occurrence at residential institution |
| <b>U242.00</b> | [X]Intentional self-harm by rifle shotgun/larger firearm discharge in school/public admin area           |
| <b>U25.00</b>  | [X]Intentional self-harm by other/unspecified firearm discharge                                          |
| <b>U250.00</b> | [X]Intentional self-harm other/unspecif firearm discharge occurrence at home                             |
| <b>U26.00</b>  | [X]Intentional self-harm by explosive material                                                           |
| <b>U27.00</b>  | [X]Intentional self-harm by smoke                                                                        |
| <b>U270.00</b> | [X]Intentional self-harm by smoke fire/flames occurrence at home                                         |
| <b>U274.00</b> | [X]Intentional self-harm by smoke fire/flame occurrence in street/highway                                |
| <b>U27z.00</b> | [X]Intentional self-harm by smoke fire/flames occurrence in unspecified place                            |
| <b>U28.00</b>  | [X]Intentional self-harm by steam hot vapours/hot objects                                                |
| <b>U280.00</b> | [X]Intentional self-harm by steam hot vapours/hot objects occurrence at home                             |
| <b>U28z.00</b> | [X]Intentional self-harm by steam hot vapours/hot objects occurrence in unspecified place                |
| <b>U29.00</b>  | [X]Intentional self-harm by sharp object                                                                 |
| <b>U290.00</b> | [X]Intentional self-harm by sharp object occurrence at home                                              |
| <b>U291.00</b> | [X]Intentional self-harm by sharp object occurrence at residential institution                           |
| <b>U294.00</b> | [X]Intentional self-harm by sharp object occurrence in street/highway                                    |
| <b>U29y.00</b> | [X]Intentional self-harm by sharp object occurrence at other specified place                             |
| <b>U29z.00</b> | [X]Intentional self-harm by sharp object occurrence at unspecified place                                 |
| <b>U2A.00</b>  | [X]Intentional self-harm by blunt object                                                                 |
| <b>U2A0.00</b> | [X]Intentional self-harm by blunt object occurrence at home                                              |
| <b>U2A1.00</b> | [X]Intentional self-harm by blunt object occurrence at residential institution                           |
| <b>U2A3.00</b> | [X]Intentional self-harm by blunt object occurrence at sports/athletic area                              |
| <b>U2B.00</b>  | [X]Intentional self-harm by jumping from a high place                                                    |
| <b>U2B0.00</b> | [X]Intentional self-harm by jumping from high place occurrence at home                                   |
| <b>U2B4.00</b> | [X]Intentional self-harm by jumping from high place occurring in street/highway                          |
| <b>U2B6.00</b> | [X]Intentional self-harm by jumping from high place industrial/construction area                         |

|                |                                                                                                        |
|----------------|--------------------------------------------------------------------------------------------------------|
| <b>U2By.00</b> | [X]Intentional self-harm by jumping from high place occurrence other specified place                   |
| <b>U2Bz.0</b>  | 0                                                                                                      |
| <b>U2C.00</b>  | [X]Intentional self-harm by jumping/lying before moving object                                         |
| <b>U2C1.00</b> | [X]Intentional self-harm by jumping/lying before moving object occurrence at residential institution   |
| <b>U2C4.00</b> | [X]Intentional self-harm by jumping/lying before moving object occurrence in street/highway            |
| <b>U2Cy.00</b> | [X]Intentional self-harm by jumping/lying before moving object occurrence other specified place        |
| <b>U2D.00</b>  | [X]Intentional self-harm by crashing of motor vehicle                                                  |
| <b>U2D0.00</b> | [X]Intentional self-harm by crashing of motor vehicle occurrence at home                               |
| <b>U2D4.00</b> | [X]Intentional self-harm by crashing of motor vehicle occurrence in street/highway                     |
| <b>U2D6.00</b> | [X]Intentional self-harm by crashing of motor vehicle occurrence industrial/construction area          |
| <b>U2E.00</b>  | <b>[X]Self-mutilation</b>                                                                              |
| <b>U2y.00</b>  | [X]Intentional self-harm by other specified means                                                      |
| <b>U2y0.00</b> | [X]Intentional self-harm by other specified means occurrence at home                                   |
| <b>U2y1.00</b> | [X]Intentional self-harm by other specified means occurrence at residential institution                |
| <b>U2yz.00</b> | [X]Intentional self-harm by other specif means occurrence at unspecified place                         |
| <b>U2z.00</b>  | [X]Intentional self-harm by unspecified means                                                          |
| <b>U2z0.00</b> | [X]Intentional self-harm by unspecified means occurrence at home                                       |
| <b>U2z2.00</b> | [X]Intentional self-harm by unspecified means occurrence school/institution/public administrative area |
| <b>U2zy.00</b> | [X]Intentional self-harm by unspecified means occurrence other specified place                         |
| <b>U2zz.00</b> | [X]Intentional self-harm by unspecified means occurrence at unspecified place                          |
| <b>U30.11</b>  | [X]Deliberate drug poisoning                                                                           |
| <b>U41.00</b>  | [X]Hanging strangulation + suffocation undetermined intent                                             |
| <b>U44.00</b>  | [X]Rifle shotgun + larger firearm discharge undetermined intent                                        |
| <b>U45.00</b>  | [X]Other + unspecified firearm discharge undetermined intent                                           |
| <b>U4B.00</b>  | [X]Falling jumping/pushed from high place undetermine intent                                           |
| <b>U4Bz.00</b> | [X]Fall jump/push from high place undetermine intent occurring at unspecified place                    |
| <b>U72.00</b>  | [X]Sequelae of intentional self-harm assault + event of undetermined intent                            |
| <b>U720.00</b> | [X]Sequelae of intentional self-harm                                                                   |
| <b>ZRLfC12</b> | Health of the Nation Outcome Scales item 2 “ nonaccidental self-injury                                 |
| <b>ZX..00</b>  | Self-harm                                                                                              |
| <b>ZX..11</b>  | Self-damage                                                                                            |
| <b>ZX1.00</b>  | Self-injurious behaviour                                                                               |
| <b>ZX1.12</b>  | SIB “ self-injurious behaviour                                                                         |
| <b>ZX1.13</b>  | Deliberate self-harm                                                                                   |
| <b>ZX11.00</b> | Biting self                                                                                            |

|                   |                                                                                                                                                   |
|-------------------|---------------------------------------------------------------------------------------------------------------------------------------------------|
| <b>ZX11.11</b>    | Bites self                                                                                                                                        |
| <b>ZX12.00</b>    | Burning self                                                                                                                                      |
| <b>ZX13.00</b>    | Cutting self                                                                                                                                      |
| <b>ZX13.11</b>    | Cuts self                                                                                                                                         |
| <b>ZX15.00</b>    | Drowning self                                                                                                                                     |
| <b>ZX18.00</b>    | Hanging self                                                                                                                                      |
| <b>ZX19.00</b>    | Hitting self                                                                                                                                      |
| <b>ZX19100</b>    | Punching self                                                                                                                                     |
| <b>ZX19200</b>    | Slapping self                                                                                                                                     |
| <b>ZX1B.00</b>    | Jumping from height                                                                                                                               |
| <b>ZX1B100</b>    | Jumping from building                                                                                                                             |
| <b>ZX1B200</b>    | Jumping from bridge                                                                                                                               |
| <b>ZX1B300</b>    | Jumping from cliff                                                                                                                                |
| <b>ZX1C.00</b>    | Nipping self                                                                                                                                      |
| <b>ZX1E.00</b>    | Pinching self                                                                                                                                     |
| <b>ZX1G.00</b>    | Scratches self                                                                                                                                    |
| <b>ZX1H.00</b>    | Self-asphyxiation                                                                                                                                 |
| <b>ZX1H100</b>    | Self-strangulation                                                                                                                                |
| <b>ZX1H200</b>    | Self-suffocation                                                                                                                                  |
| <b>ZX1I.00</b>    | Self-scalding                                                                                                                                     |
| <b>ZX1J.00</b>    | Self-electrocution                                                                                                                                |
| <b>ZX1K.00</b>    | Self-incineration                                                                                                                                 |
| <b>ZX1K.11</b>    | Setting fire to self                                                                                                                              |
| <b>ZX1K.12</b>    | Setting self alight                                                                                                                               |
| <b>ZX1L.00</b>    | Self-mutilation                                                                                                                                   |
| <b>ZX1L100</b>    | Self-mutilation of hands                                                                                                                          |
| <b>ZX1L200</b>    | Self-mutilation of genitalia                                                                                                                      |
| <b>ZX1L300</b>    | Self-mutilation of penis                                                                                                                          |
| <b>ZX1L600</b>    | Self-mutilation of ears                                                                                                                           |
| <b>ZX1LD00</b>    | [X]Self mutilation                                                                                                                                |
| <b>ZX1M.00</b>    | Shooting self                                                                                                                                     |
| <b>ZX1N.00</b>    | Stabbing self                                                                                                                                     |
| <b>ZX1Q.00</b>    | Throwing self in front of train                                                                                                                   |
| <b>ZX1Q.11</b>    | Jumping under train                                                                                                                               |
| <b>ZX1R.00</b>    | Throwing self in front of vehicle                                                                                                                 |
| <b>ZX1S.00</b>    | Throwing self onto floor                                                                                                                          |
|                   |                                                                                                                                                   |
| <b>ICD-10code</b> | <b>Description</b>                                                                                                                                |
| <b>X60</b>        | Intentional self-poisoning by and exposure to nonopioid analgesics, antipyretics and antirheumatics                                               |
| <b>X61</b>        | Intentional self-poisoning by and exposure to antiepileptic, sedative-hypnotic, antiparkinsonism and psychotropic drugs, not elsewhere classified |
| <b>X62</b>        | Intentional self-poisoning by and exposure to narcotics and psychodysleptics                                                                      |



|            |                                                                                                                                                       |
|------------|-------------------------------------------------------------------------------------------------------------------------------------------------------|
|            | [hallucinogens], not elsewhere classified                                                                                                             |
| <b>X63</b> | Intentional self-poisoning by and exposure to other drugs acting on the autonomic nervous system                                                      |
| <b>X64</b> | Intentional self-poisoning by and exposure to other and unspecified drugs, medicaments and biological substances                                      |
| <b>X65</b> | Intentional self-poisoning by and exposure to alcohol                                                                                                 |
| <b>X66</b> | Intentional self-poisoning by and exposure to organic solvents and halogenated hydrocarbons and their vapours                                         |
| <b>X67</b> | Intentional self-poisoning by and exposure to other gases and vapours                                                                                 |
| <b>X68</b> | Intentional self-poisoning by and exposure to pesticides                                                                                              |
| <b>X69</b> | Intentional self-poisoning by and exposure to other and unspecified chemicals and noxious substances                                                  |
| <b>X70</b> | Intentional self-harm by hanging, strangulation and suffocation                                                                                       |
| <b>X71</b> | Intentional self-harm by drowning and submersion                                                                                                      |
| <b>X72</b> | Intentional self-harm by handgun discharge                                                                                                            |
| <b>X73</b> | Intentional self-harm by rifle, shotgun and larger firearm discharge                                                                                  |
| <b>X74</b> | Intentional self-harm by other and unspecified firearm discharge                                                                                      |
| <b>X75</b> | Intentional self-harm by explosive material                                                                                                           |
| <b>X76</b> | Intentional self-harm by smoke, fire and flames                                                                                                       |
| <b>X77</b> | Intentional self-harm by steam, hot vapours and hot objects                                                                                           |
| <b>X78</b> | Intentional self-harm by sharp object                                                                                                                 |
| <b>X79</b> | Intentional self-harm by blunt object                                                                                                                 |
| <b>X80</b> | Intentional self-harm by jumping from a high place                                                                                                    |
| <b>X81</b> | Intentional self-harm by jumping or lying before moving object                                                                                        |
| <b>X82</b> | Intentional self-harm by crashing of motor vehicle                                                                                                    |
| <b>X83</b> | Intentional self-harm by other specified means                                                                                                        |
| <b>X84</b> | Intentional self-harm by unspecified means                                                                                                            |
| <b>Y10</b> | Poisoning by and exposure to nonopioid analgesics, antipyretics and antirheumatics, undetermined intent                                               |
| <b>Y11</b> | Poisoning by and exposure to antiepileptic, sedative-hypnotic, antiparkinsonism and psychotropic drugs, not elsewhere classified, undetermined intent |
| <b>Y12</b> | Poisoning by and exposure to narcotics and psychodysleptics [hallucinogens], not elsewhere classified, undetermined intent                            |
| <b>Y13</b> | Poisoning by and exposure to other drugs acting on the autonomic nervous system, undetermined intent                                                  |
| <b>Y14</b> | Poisoning by and exposure to other and unspecified drugs, medicaments and biological substances, undetermined intent                                  |
| <b>Y15</b> | Poisoning by and exposure to alcohol, undetermined intent                                                                                             |
| <b>Y16</b> | Poisoning by and exposure to organic solvents and halogenated hydrocarbons and their vapours, undetermined intent                                     |
| <b>Y17</b> | Poisoning by and exposure to other gases and vapours, undetermined intent                                                                             |
| <b>Y18</b> | Poisoning by and exposure to pesticides, undetermined intent                                                                                          |
| <b>Y19</b> | Poisoning by and exposure to other and unspecified chemicals and noxious substances, undetermined intent                                              |
| <b>Y20</b> | Hanging, strangulation and suffocation, undetermined intent                                                                                           |

|            |                                                                             |
|------------|-----------------------------------------------------------------------------|
| <b>Y21</b> | Drowning and submersion, undetermined intent                                |
| <b>Y22</b> | Handgun discharge, undetermined intent                                      |
| <b>Y23</b> | Rifle, shotgun and larger firearm discharge, undetermined intent            |
| <b>Y24</b> | Other and unspecified firearm discharge, undetermined intent                |
| <b>Y25</b> | Contact with explosive material, undetermined intent                        |
| <b>Y26</b> | Exposure to smoke, fire and flames, undetermined intent                     |
| <b>Y27</b> | Contact with steam, hot vapours and hot objects, undetermined intent        |
| <b>Y28</b> | Contact with sharp object, undetermined intent                              |
| <b>Y29</b> | Contact with blunt object, undetermined intent                              |
| <b>Y30</b> | Falling, jumping or pushed from a high place, undetermined intent           |
| <b>Y31</b> | Falling, lying or running before or into moving object, undetermined intent |
| <b>Y32</b> | Crashing of motor vehicle, undetermined intent                              |
| <b>Y33</b> | Other specified events, undetermined intent                                 |
| <b>Y34</b> | Unspecified event, undetermined intent                                      |

### Appendix C. Covariates Forced into the High Density Propensity Score

|                                                                                                                                              |
|----------------------------------------------------------------------------------------------------------------------------------------------|
| <b>All covariates assessed in the 365 days prior to study index date</b>                                                                     |
| Age at index date                                                                                                                            |
| Alcohol Abuse [Never, Former, Current, Unknown]                                                                                              |
| BMI                                                                                                                                          |
| Duration of treated diabetes [time between first oral antidiabetic drug and study index date]                                                |
| History of:<br>Cirrhosis<br>Congestive heart failure<br>Hypertension<br>Hyperlipidemia<br>Ischemic heart disease<br>Peripheral heart disease |
| Number of hospitalizations                                                                                                                   |
| Most recent HbA1c value to index date                                                                                                        |
| Number of distinct prescription drugs                                                                                                        |
| Prior use of benzodiazepines or other hypnotics, antipsychotics, levothyroxine or triiodothyronine, anticonvulsants, or mood stabilizers     |
| Sex                                                                                                                                          |
| Smoking status [Never, Former, Current, Unknown]                                                                                             |
| Socioeconomic status [quintiles of Index of Multiple Deprivation]                                                                            |
| Use of other antidiabetic agents                                                                                                             |
| Year of cohort entry                                                                                                                         |

**Appendix D. Measures of frequency and association for depression among DPP-4 inhibitor and GLP-1 receptor agonist cohorts**

|                                                    | <b>DPP4i</b>        | <b>SU</b>           | <b>GLP1ra</b>       | <b>SU</b>           |
|----------------------------------------------------|---------------------|---------------------|---------------------|---------------------|
| <b>Number of patients</b>                          | 6207                | 22218               | 502                 | 16728               |
| <b>Person-years follow-up</b>                      | 5591                | 18683               | 549                 | 13628               |
| <b>Number of events</b>                            | 45                  | 215                 | 10                  | 182                 |
| <b>Incidence per 1000 person-years<br/>(95%CI)</b> | 8.0<br>(6.0-10.8)   | 11.5<br>(10.1-13.2) | 18.2<br>(10-33.5)   | 13.4<br>(11.6-15.4) |
| <b>Crude Hazard Ratio<br/>(95% CI)</b>             | 0.70<br>(0.50-0.96) | -ref-               | 1.39<br>(0.74-2.63) | -ref-               |
| <b>Adjusted Hazard Ratio<br/>(95% CI)</b>          | 0.81<br>(0.57-1.14) | -ref-               | 1.22<br>(0.61-2.42) | -ref-               |

**S = suppressed due to low number of events**

**Appendix E. Measures of frequency and association for self-harm among DPP-4 inhibitor and GLP-1 receptor agonist cohorts**

|                                                    | <b>DPP4i</b>        | <b>SU</b>        | <b>GLP1ra</b> | <b>SU</b> |
|----------------------------------------------------|---------------------|------------------|---------------|-----------|
| <b>Number of patients</b>                          | 6211                | 22180            | 502           | 16632     |
| <b>Person-years follow-up</b>                      | 5632                | 18839            | 563           | 13696     |
| <b>Number of events</b>                            | S                   | 5                | S             | S         |
| <b>Incidence per 1000 person-years<br/>(95%CI)</b> | S                   | 0.3<br>(0.1-0.6) | S             | S         |
| <b>Crude Hazard Ratio<br/>(95% CI)</b>             | 0.66<br>(0.08-5.69) | -ref-            | S             | -ref-     |
| <b>Adjusted Hazard Ratio<br/>(95% CI)</b>          | 0.77<br>(0.07-8.21) | -ref-            | S             | -ref-     |

**S = suppressed due to low number of events**

**Appendix F. Measures of frequency and association for depression or self-harm among DPP-4 inhibitor and GLP-1 receptor agonist cohorts when patients are matched 1:1 by propensity score.**

|                                                    | <b>DPP4i</b>        | <b>SU</b>          | <b>GLP1ra</b>       | <b>SU</b>          |
|----------------------------------------------------|---------------------|--------------------|---------------------|--------------------|
| <b>Number of patients</b>                          | 6008                | 6008               | 488                 | 488                |
| <b>Person-years follow-up</b>                      | 548                 | 4488               | 529                 | 349                |
| <b>Number of events</b>                            | 44                  | 49                 | 10                  | 7                  |
| <b>Incidence per 1000 person-years<br/>(95%CI)</b> | 8.0<br>(6-10.8)     | 10.9<br>(8.3-14.4) | 18.9<br>(10.4-34.8) | 20.1<br>(9.9-41.3) |
| <b>Crude Hazard Ratio<br/>(95% CI)</b>             | 0.75<br>(0.50-1.13) | -ref-              | 0.99<br>(0.37-2.61) | -ref-              |
| <b>Adjusted Hazard Ratio<br/>(95% CI)</b>          | 0.77<br>(0.51-1.16) | -ref-              | 0.98<br>(0.36-2.61) | -ref-              |

**Appendix G. Measures of frequency and association for depression or self-harm among DPP-4 inhibitor and GLP-1 receptor agonist cohorts when patients are adjusted for pattern of glucose-lowering therapy.**

|                                                    | <b>DPP4i</b>        | <b>SU</b>          | <b>GLP1RA</b>       | <b>SU</b>           |
|----------------------------------------------------|---------------------|--------------------|---------------------|---------------------|
| <b>Number of patients</b>                          | 4416                | 15943              | 117                 | 4165                |
| <b>Person-years follow-up</b>                      | 3743                | 12614              | 90                  | 3327                |
| <b>Number of events</b>                            | 36                  | 140                | S                   | 61                  |
| <b>Incidence per 1000 person-years<br/>(95%CI)</b> | 9.6<br>(7-13.3)     | 11.1<br>(9.4-13.1) | 33.4<br>(12.1-97.5) | 18.3<br>(14.3-23.6) |
| <b>Crude Hazard Ratio<br/>(95% CI)</b>             | 0.86<br>(0.60-1.24) | -ref-              | 1.82<br>(0.57-5.80) | -ref-               |
| <b>Adjusted Hazard Ratio<br/>(95% CI)</b>          | 1.00<br>(0.66-1.49) | -ref-              | 1.55<br>(0.46-5.18) | -ref-               |

**S = suppressed due to low number of events**

**Appendix H. Measures of frequency and association for depression or self-harm among DPP-4 inhibitor and GLP-1 receptor agonist cohorts when patients are restricted to only those with HES/ONS linked data.**

|                                                    | <b>DPP4i</b>        | <b>SU</b>           | <b>GLP1ra</b>       | <b>SU</b>         |
|----------------------------------------------------|---------------------|---------------------|---------------------|-------------------|
| <b>Number of patients</b>                          | 3348                | 13243               | 262                 | 9997              |
| <b>Person-years follow-up</b>                      | 2841                | 10762               | 290                 | 7904              |
| <b>Number of events</b>                            | 27                  | 132                 | S                   | 111               |
| <b>Incidence per 1000 person-years<br/>(95%CI)</b> | 9.5<br>(6.5-13.8)   | 12.3<br>(10.3-14.5) | 13.8<br>(5.6-35.3)  | 14<br>(11.7-16.9) |
| <b>Crude Hazard Ratio<br/>(95% CI)</b>             | 0.78<br>(0.51-1.17) | -ref-               | 1.00<br>(0.37-2.72) | -ref-             |
| <b>Adjusted Hazard Ratio<br/>(95% CI)</b>          | 0.99<br>(0.63-1.55) | -ref-               | 0.93<br>(0.32-2.71) | -ref-             |

**Appendix I. Measures of frequency and association for depression or self-harm among DPP-4 inhibitor and GLP-1 receptor agonist cohorts when patients are restricted to second-line therapy after metformin monotherapy.**

|                                                    | <b>DPP4i</b>        | <b>SU</b>           | <b>GLP1ra</b>    | <b>SU</b>         |
|----------------------------------------------------|---------------------|---------------------|------------------|-------------------|
| <b>Number of patients</b>                          | 1255                | 4612                | 65               | 2112              |
| <b>Person-years follow-up</b>                      | 1191                | 3601                | 47               | 1680              |
| <b>Number of events</b>                            | 11                  | 48                  | S                | 29                |
| <b>Incidence per 1000 person-years<br/>(95%CI)</b> | 9.2<br>(5.2-16.5)   | 13.3<br>(10.1-17.7) | 43(13.3-155.3)   | 17.3<br>(12-24.8) |
| <b>Crude Hazard Ratio<br/>(95% CI)</b>             | 0.71<br>(0.37-1.38) | -ref-               | 2.49(0.59-10.45) | -ref-             |
| <b>Adjusted Hazard Ratio<br/>(95% CI)</b>          | 0.67<br>(0.34-1.34) | -ref-               | 1.92(0.44-8.31)  | -ref-             |

**S = suppressed due to low number of events**

**Appendix J. Measures of frequency and association for depression or self-harm among DPP-4 inhibitor and GLP-1 receptor agonist cohorts when BMI categories (in addition to hdps deciles) were added to the Cox proportional regression model.**

|                                            | DPP4i               | SU                  | GLP1ra              | SU                  |
|--------------------------------------------|---------------------|---------------------|---------------------|---------------------|
| Number of patients                         | 6206                | 22128               | 501                 | 16409               |
| Person-years follow-up                     | 5589                | 18596               | 549                 | 13418               |
| Number of events                           | 46                  | 218                 | 10                  | 183                 |
| Incidence per 1000 person-years<br>(95%CI) | 8.2<br>(6.2-11)     | 11.7<br>(10.3-13.4) | 18.2<br>(10-33.5)   | 13.6<br>(11.8-15.8) |
| Crude Hazard Ratio<br>(95% CI)             | 0.70<br>(0.51-0.96) | -ref-               | 1.36<br>(0.72-2.58) | -ref-               |
| Adjusted Hazard Ratio<br>(95% CI)          | 0.81<br>(0.58-1.15) | -ref-               | 1.25<br>(0.63-2.51) | -ref-               |

S = suppressed due to low number of events

**Appendix K. Time-dependent Cox regression for DPP-4 inhibitor monotherapy and combination therapies Vs. Sulfonylurea (SU) monotherapy**

| Exposure vs. SU monotherapy | Coef  | *Adjusted HR | Lower .95 | Upper .95 | Se (coef) | Pr (> z ) |
|-----------------------------|-------|--------------|-----------|-----------|-----------|-----------|
| DPP-4i monotherapy          | -0.07 | 0.93         | 0.65      | 1.32      | 0.18      | 0.69      |
| DPP-4i/SU                   | -0.53 | 0.59         | 0.34      | 1.02      | 0.28      | 0.06      |
| DPP-4i/Other                | -0.16 | 0.85         | 0.70      | 1.04      | 0.10      | 0.11      |
| DPP-4i/SU/Other             | -0.13 | 0.88         | 0.68      | 1.14      | 0.13      | 0.33      |

\*Adjusted for deciles of hdps

**Appendix L. Time-dependent Cox regression for GLP-1 receptor agonist (GLP1ra) monotherapy and combination therapies Vs. Sulfonylurea (SU) monotherapy**

| Exposure vs. SU monotherapy | Coef  | *Adjusted HR | Lower .95 | Upper .95 | Se (coef) | Pr (> z ) |
|-----------------------------|-------|--------------|-----------|-----------|-----------|-----------|
| GLP1ra monotherapy          | -0.51 | 0.60         | 0.30      | 1.21      | 0.36      | 0.15      |
| GLP1ra /SU                  | 0.45  | 1.57         | 0.78      | 3.18      | 0.36      | 0.21      |
| GLP1ra /Other               | 0.14  | 1.16         | 0.88      | 1.52      | 0.14      | 0.31      |
| GLP1ra /SU/Other            | -0.31 | 0.73         | 0.47      | 1.15      | 0.23      | 0.18      |

\*Adjusted for deciles of hdps
